# Supplementary material for: Regionalized Protein Localization Domains in the Zebrafish Hair Cell Kinocilium
Source: MDPI journal article supplement (doi:10.3390/jdb11020028), 2023-06-16
Supplement: s1 [file s1]

Erickson et al. Figures S1-8

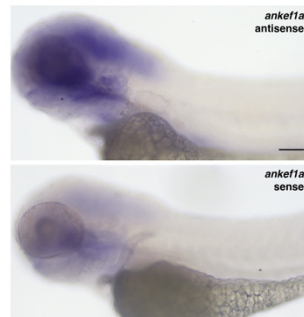

**Figure S1.** Wholemount mRNA in situ hybridization (ISH) for *ankef1a* on 3 day post-fertilization zebrafish larvae using antisense (top) and sense (bottom) DIG-labeled probes targeted to nucleotides 1912-2687 of ENSDART00000153006.2. Primers used to generate the *ankef1a* ISH probe templates are detailed in Table S1. Scale bar = 100  $\mu$ m.

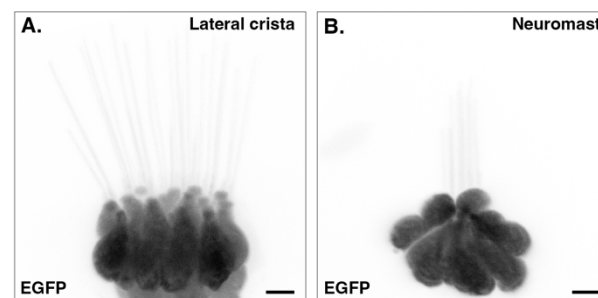

**Figure S2.** EGFP localization in hair cells of a lateral crista (A) and lateral line neuromast (B) in a *Tg(myo6b:EGFP)vo68* transgenic zebrafish at 5 days post-fertilization. Scale bars = 5  $\mu$ m.

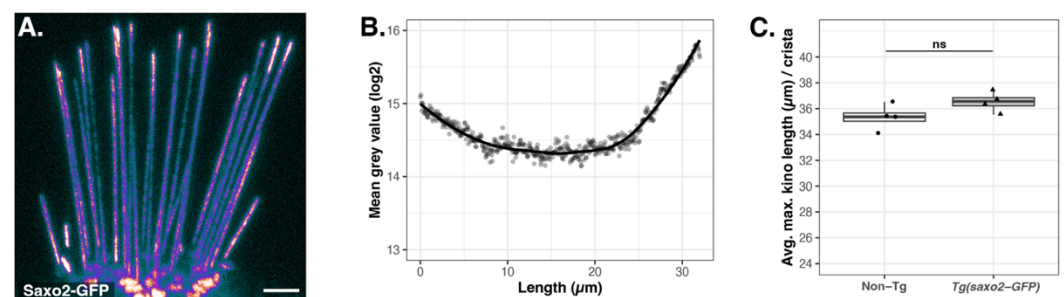

**Figure S3.** Saxo2-GFP kinocilia distribution and effect on kinocilia height. **A.** Pixel intensity-encoded image of Saxo2-GFP in the kinocilia of lateral crista hair cells at 5 days post-fertilization (dpf). Brighter colours indicate higher fluorescence intensity. **B.** Scatter plot of averaged mean grey values (log2) for fluorescence intensity from kinocilia in the lateral cristae of Saxo2-GFP transgenics ( $n = 16$  kinocilia from 4 individuals at 5 dpf). Position 0  $\mu$ m is from the proximal region near the base of kinocilia and position 32  $\mu$ m is the distal-most tip. **C.** Boxplots of maximum kinocilia length in the lateral crista of *saxo2-GFP* transgenics and their non-transgenic siblings at 5 dpf. Data points are the average length of the five tallest kinocilia from an individual larva. Two-tailed Welch's t-test statistics: non-Tg,  $n = 4$  larvae, mean = 35.3  $\mu$ m; *Tg(saxo2-GFP)*,  $n = 4$ , mean = 36.5  $\mu$ m;  $t = -1.8712$ ,  $df = 5.5674$ ,  $p = 0.1143$ . Scale bar is 5  $\mu$ m in A.

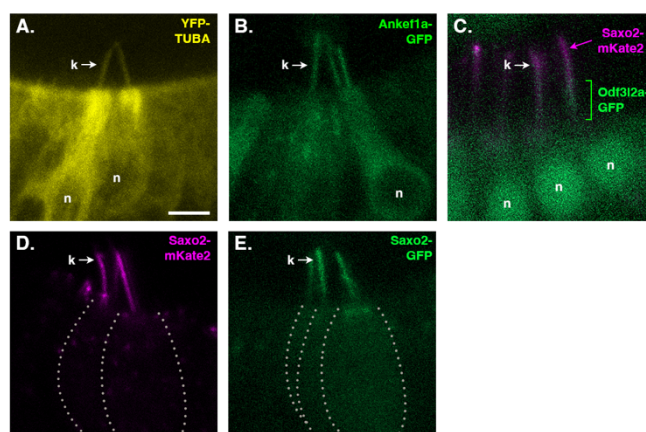

**Figure S4.** Transgenic protein localization in hair cells of the anterior macula: **A.** YFP-TUBA; **B.** Ankef1a-GFP; **C.** Odf3l2a-GFP with Saxo2-mKate2; **D.** Saxo2-mKate2; **E.** Saxo2-GFP. All images are from 1-day post-fertilization (dpf) larvae, except panel C which is at 5 dpf due to low fluorescence intensity for Odf3l2a-GFP at 1 dpf. Approximate cell outlines are indicated by dashed lines in panels D and E. k = kinocilium, n = nucleus. Scale bar = 5  $\mu$ m, applies to all images.

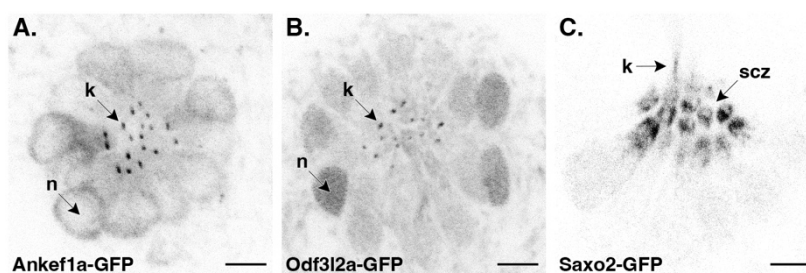

**Figure S5.** Ankef1a-GFP (**A**), Odf3l2a-GFP (**B**), and Saxo2-GFP (**C**) localization patterns in the soma of neuromast hair cells (top-down views). k = kinocilium, n = nucleus, scz = subcuticular zone. Scale bars = 5  $\mu$ m.

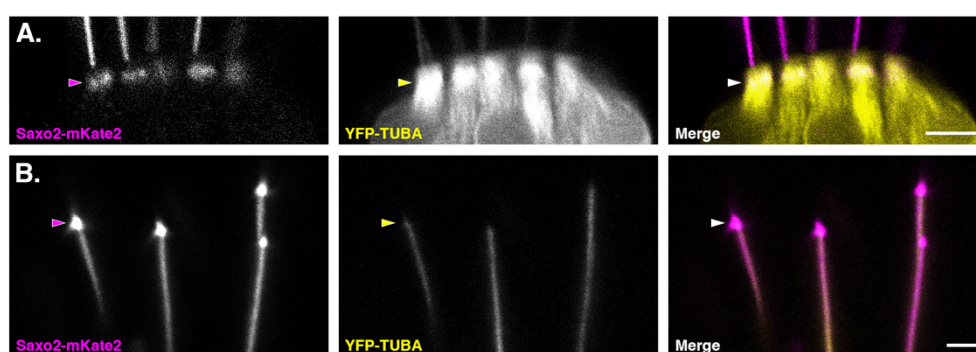

**Figure S6.** Details of Saxo2-mKate2 and YFP-TUBA co-localization in the subcuticular zone (**A**) and at the distal tip of kinocilia (**B**) in the lateral crista at 6 days post fertilization. Scale bar is 5  $\mu$ m in A and 2  $\mu$ m in B.

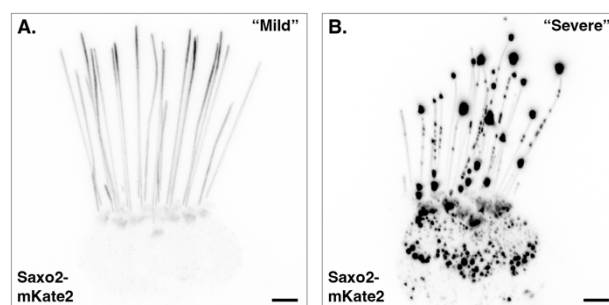

**Figure S7.** Comparison of fluorescent protein intensity levels in Saxo2-mKate2 “mild” (A) and “severe” (B) transgenic lines at 6 days post-fertilization. The image in panel B was captured at 88% of the gain of that in panel A, thus slightly underrepresenting the true intensity difference between the two lines. Scale bars = 5  $\mu$ m.

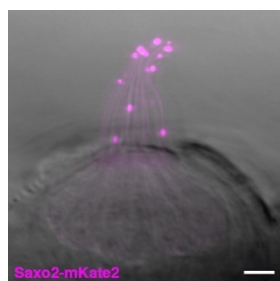

**Figure S8.** Example of the “severe” phenotype in a neuromast of a *saxo2-mKate2* transgenic at 5 days post-fertilization. Scale bar = 5  $\mu$ m.

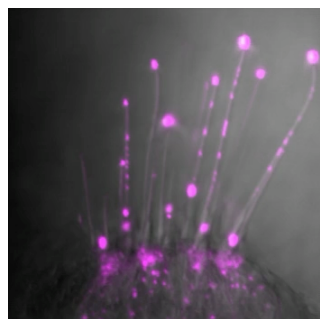

**Video S1.** Movement of Saxo2-mKate2 positive punctae in the kinocilia of lateral crista hair cells in a 5 dpf zebrafish larva. Note the bi-directional motion of the puncta on the left. Video info: 20 frames over 60 sec, played back at 7 fps, depth of 4.7  $\mu$ m, frame dimension 40x40  $\mu$ m.
