# Supplementary material for: Regionalized Protein Localization Domains in the Zebrafish Hair Cell Kinocilium
Source: J Dev Biol. 2023 Jun 16;11(2):28. doi: 10.3390/jdb11020028 (PMC10299642; doi:10.3390/jdb11020028)
Supplement: Supplementary file 1 [file jdb-11-00028-s001.zip › jdb-2216713-Supplemental Tables S1-4_v2.xlsx]

## Sheet: Table S1 Primers
Table S1 - Oligonucleotide primers
Primer name	Primer Sequence	Notes
ankef1a-attB1F	ggggACAAGTTTGTACAAAAAAGCAGGCTccaccATGTCCTGCAAACAGGCC	ankef1a sequence underlined in caps, in attB1F site in caps, ccacc Kozak
ankef1a-attB2R	ggggACCACTTTGTACAAGAAAGCTGGGTcGTCAGTGAGCTCAAACTCCATAGA	ankef1a sequence underlined in caps, in attB2R site in caps
ankef1a-ORF-ISH-F	CTGCTCATTTCAGACATCGAC	ankef1a product (2398 bp) cloned into pCR4 vector for ISH probe synthesis
ankef1a-ORF-ISH-R	CTCTGATTTTGCTTTGATATACCTG	ankef1a product (2398 bp) cloned into pCR4 vector for ISH probe synthesis
ankef1a-ISH-F	TCATCAAAGCTGGTGCAAAG	ankef1a product (776 bp) cloned into pCR4 vector for ISH probe synthesis
ankef1a-ISH-R	TGGAAACATGGGGTTCTCTC	ankef1a product (776 bp) cloned into pCR4 vector for ISH probe synthesis
odf3l2a-attB1F	ggggACAAGTTTGTACAAAAAAGCAGGCTccaccATGGCGGAGGTGGAG	odf3l2a sequence underlined in caps, in attB1F site in caps, ccacc Kozak
odf3l2a-attB2R	ggggACCACTTTGTACAAGAAAGCTGGGTcATCTAATACATCAACAATCAGTGGC	odf3l2a sequence underlined in caps, in attB2R site in caps
odf3l2a-ISH-T3-F	cacaCATTAACCCTCACTAAAGGGAACCGGCCTATTCCTTCCACAG	odf3l2a sequence underlined in caps, T3 site in caps
odf3l2a-ISH-T7-R	cacaTAATACGACTCACTATAGGGACAAACTCGGAGTGACGGAC	odf3l2a sequence underlined in caps, T7 site in caps
saxo2-attB1F	ggggACAAGTTTGTACAAAAAAGCAGGCTccaccATGAAAATGACACGCCTTTG	saxo2 sequence underlined in caps, in attB1F site in caps, ccacc Kozak
saxo2-attB2R	ggggACCACTTTGTACAAGAAAGCTGGGTcAGCTGTCAAGACCATTTCTTTTG	saxo2 sequence underlined in caps, in attB2R site in caps
saxo2-ISH-F	AAGACCCTCAGACCAACGTG	saxo2 product (729 bp) cloned into pCR4 vector for ISH probe synthesis
saxo2-ISH-R	TCTGGAAGGGTTTGTTGGAG	saxo2 product (729 bp) cloned into pCR4 vector for ISH probe synthesis

## Sheet: Table S2 4TU-UPRT enriched 
Feature	ID	Description	FDR (p<0.05)	Log2 Fold Change	Shrunk Log2 Fold Change	DMSO-UPRT	DMSO-4sU
BX511021.2	ENSDARG00000073936	Ferritin [Source:UniProtKB/TrEMBL;Acc:E7FGI6]	0	7.53026	6.24933	7.83184	0.199395
zgc:109934	ENSDARG00000094210	zgc:109934 [Source:ZFIN;Acc:ZDB-GENE-050522- 428]	0	6.20824	5.86555	9.91177	3.59249
pir	ENSDARG00000056638	pirin [Source:ZFIN;Acc:ZDB-GENE-040718-288]	0	4.79722	4.48146	8.50338	3.62035
PTGR1 (2 of 2)	ENSDARG00000087017	prostaglandin reductase 1 [Source:HGNC Symbol;Acc:HGNC:18429]	0	4.48931	4.08422	7.43223	2.86634
txn	ENSDARG00000044125	thioredoxin [Source:ZFIN;Acc:ZDB-GENE-040718- 162]	0	3.48596	3.26055	8.23924	4.71993
prdx1	ENSDARG00000058734	peroxiredoxin 1 [Source:ZFIN;Acc:ZDB-GENE- 050320-35]	0	3.36451	3.05916	7.21695	3.76486
zgc:92066	ENSDARG00000031776	zgc:92066 [Source:ZFIN;Acc:ZDB-GENE-040718- 72]	0	3.29872	2.98141	8.20359	4.82449
s100t	ENSDARG00000055589	S100 calcium binding protein T [Source:ZFIN;Acc:ZDB-GENE-050320-61]	0	3.14989	2.92899	7.63785	4.41063
sqstm1	ENSDARG00000075014	sequestosome 1 [Source:ZFIN;Acc:ZDB-GENE- 040426-2204]	0	3.13894	2.88696	7.54831	4.35454
aifm4	ENSDARG00000061634	apoptosis-inducing factor, mitochondrion- associated, 4 [Source:ZFIN;Acc:ZDB-GENE-070112-2282]	0	2.96524	2.74448	7.81644	4.78476
gstp1	ENSDARG00000104068	glutathione S-transferase pi 1 [Source:ZFIN;Acc:ZDB-GENE-020806-4]	0	2.85874	2.72001	9.07279	6.13581
zgc:173593	ENSDARG00000077360	zgc:173593 [Source:ZFIN;Acc:ZDB-GENE-071004- 57]	2.8e-44	5.88224	4.43104	5.9444	-0.0615817
gnb3a	ENSDARG00000004358	guanine nucleotide binding protein (G protein), beta polypeptide 3a [Source:ZFIN;Acc:ZDB-GENE- 040718-134]	4.06e-43	2.88573	2.64153	7.27804	4.32865
sagb	ENSDARG00000038378	S-antigen; retina and pineal gland (arrestin) b [Source:ZFIN;Acc:ZDB-GENE-050913-98]	1.19e-42	2.29577	2.16751	8.54235	6.18263
zgc:113276	ENSDARG00000056650	zgc:113276 [Source:ZFIN;Acc:ZDB-GENE-050522- 7]	5.17e-42	3.87703	3.31398	6.15484	2.20368
gnao1b	ENSDARG00000036058	guanine nucleotide binding protein (G protein), alpha activating activity polypeptide O, b [Source:ZFIN;Acc:ZDB-GENE-040426-1693]	5.17e-42	2.46431	2.30463	8.54704	6.01467
CABZ01041812.1	ENSDARG00000061481	Uncharacterized protein [Source:UniProtKB/TrEMBL;Acc:E7FGT6]	8.56e-41	3.19063	2.85023	6.67012	3.40767
sqrdl	ENSDARG00000017034	sulfide quinone reductase-like (yeast) [Source:ZFIN;Acc:ZDB-GENE-050417-436]	1.73e-38	2.84874	2.58778	6.91137	3.99489
ADGRF3 (2 of 2)	ENSDARG00000093008	adhesion G protein-coupled receptor F3 [Source:HGNC Symbol;Acc:HGNC:18989]	2.34e-38	3.76057	3.1973	6.47334	2.76844
vsx1	ENSDARG00000056292	visual system homeobox 1 homolog, chx10-like [Source:ZFIN;Acc:ZDB-GENE-990415-205]	7.79e-38	2.48352	2.30374	7.84562	5.29783
gna14a	ENSDARG00000025013	guanine nucleotide binding protein (G protein), alpha 14a [Source:ZFIN;Acc:ZDB-GENE-081105-76]	2.44e-35	3.33795	2.90149	6.41091	3.05603
TRNP1	ENSDARG00000100722	TMF1-regulated nuclear protein 1 [Source:HGNC Symbol;Acc:HGNC:34348]	2.62e-35	3.04452	2.70451	7.44349	4.33862
dhrs13l1	ENSDARG00000098746	dehydrogenase/reductase (SDR family) member 13 like 1 [Source:ZFIN;Acc:ZDB-GENE-040426-1907]	1.57e-34	2.09105	1.97178	8.0385	5.89348
nme2a	ENSDARG00000043820	NME/NM23 nucleoside diphosphate kinase 2a [Source:ZFIN;Acc:ZDB-GENE-030131-7656]	4.1e-30	2.90091	2.56077	6.47241	4.00789
opn1mw1	ENSDARG00000097008	opsin 1 (cone pigments), medium-wave- sensitive, 1 [Source:ZFIN;Acc:ZDB-GENE-990604-42]	2.66e-29	1.63528	1.56733	8.74736	7.03694
syt5a	ENSDARG00000037941	synaptotagmin Va [Source:ZFIN;Acc:ZDB-GENE- 040718-110]	5.98e-29	2.22411	2.05709	7.3928	5.08112
higd1a	ENSDARG00000022303	HIG1 hypoxia inducible domain family, member 1A [Source:ZFIN;Acc:ZDB-GENE-030826-15]	2.41e-28	2.9251	2.55823	6.28357	3.28579
maff	ENSDARG00000028957	v-maf avian musculoaponeurotic fibrosarcoma oncogene homolog F [Source:ZFIN;Acc:ZDB-GENE-040426-1280]	1.37e-27	2.08837	1.94255	7.23603	5.06342
si:ch211-117m20.5	ENSDARG00000091996	si:ch211-117m20.5 [Source:ZFIN;Acc:ZDB-GENE- 030131-12]	2.65e-27	2.33543	2.13303	6.87586	4.50076
BX957278.1	ENSDARG00000010940	Uncharacterized protein [Source:UniProtKB/TrEMBL;Acc:E7F2U0]	6.78e-27	3.06189	2.6264	6.30551	3.19374
slc40a1	ENSDARG00000000241	solute carrier family 40 (iron-regulated transporter), member 1 [Source:ZFIN;Acc:ZDB-GENE-000511- 8]	2.17e-26	1.89826	1.78273	7.85459	5.86774
pvalb8	ENSDARG00000037790	parvalbumin 8 [Source:ZFIN;Acc:ZDB-GENE- 030805-3]	8.36e-26	2.07519	1.92285	8.10133	5.94242
saga	ENSDARG00000012610	S-antigen; retina and pineal gland (arrestin) a [Source:ZFIN;Acc:ZDB-GENE-040426-1538]	8.36e-26	1.85888	1.74781	7.67333	5.74851
pcsk5a	ENSDARG00000067537	proprotein convertase subtilisin/kexin type 5a [Source:ZFIN;Acc:ZDB-GENE-060531-130]	2.22e-25	2.85736	2.47813	6.66164	3.89491
gsto2	ENSDARG00000033285	glutathione S-transferase omega 2 [Source:ZFIN;Acc:ZDB-GENE-041114-67]	5.09e-25	2.34564	2.12398	6.98222	4.59073
cmbl	ENSDARG00000073786	carboxymethylenebutenolidase homolog (Pseudomonas) [Source:ZFIN;Acc:ZDB-GENE-071004-21]	1.79e-24	2.45379	2.19737	7.20484	5.95936
sult6b1	ENSDARG00000086826	sulfotransferase family, cytosolic, 6b, member 1 [Source:ZFIN;Acc:ZDB-GENE-050417-228]	6.5e-24	1.83388	1.71928	7.51033	5.60858
igsf21b	ENSDARG00000056084	immunoglobin superfamily, member 21b [Source:ZFIN;Acc:ZDB-GENE-070424-59]	8.44e-24	2.89388	2.47957	6.29849	3.35454
AC024175.2	ENSDARG00000080151	No description	1.07e-23	1.40595	1.35247	10.8833	9.41277
pde6b	ENSDARG00000011671	phosphodiesterase 6B, cGMP-specific, rod, beta [Source:ZFIN;Acc:ZDB-GENE-090421-2]	4.8e-23	2.1657	1.97523	6.67419	4.44737
tpmt.1	ENSDARG00000055974	thiopurine S-methyltransferase, tandem duplicate 1 [Source:ZFIN;Acc:ZDB-GENE-050522-141]	6.05e-23	2.62082	2.29471	6.50642	3.80979
zgc:198419	ENSDARG00000076221	zgc:198419 [Source:ZFIN;Acc:ZDB-GENE-030131- 7540]	1.41e-22	6.06948	3.04774	8.75593	2.66081
mt-atp8	ENSDARG00000063910	ATP synthase 8, mitochondrial [Source:ZFIN;Acc:ZDB-GENE-011205-19]	1.43e-22	1.37514	1.32262	10.9362	9.49934
otofb	ENSDARG00000020581	otoferlin b [Source:ZFIN;Acc:ZDB-GENE-110406- 5]	1.53e-22	1.96227	1.81515	8.8839	6.8545
gabrb3	ENSDARG00000023771	gamma-aminobutyric acid (GABA) A receptor, beta 3 [Source:ZFIN;Acc:ZDB-GENE-101102-2]	2.01e-22	2.11031	1.92853	7.24556	5.39463
mt-nd6	ENSDARG00000063922	NADH dehydrogenase 6, mitochondrial [Source:ZFIN;Acc:ZDB-GENE-011205-13]	2.01e-22	1.6858	1.59018	10.4828	9.20938
gnat1	ENSDARG00000044199	guanine nucleotide binding protein (G protein), alpha transducing activity polypeptide 1 [Source:ZFIN;Acc:ZDB-GENE-011128-11]	2.56e-22	1.88662	1.75388	7.14767	5.18452
myo15ab	ENSDARG00000078474	myosin XVAb [Source:ZFIN;Acc:ZDB-GENE-090312- 149]	4.37e-22	2.81581	2.40496	6.36869	3.61697
si:ch211-14a17.10	ENSDARG00000076534	si:ch211-14a17.10 [Source:ZFIN;Acc:ZDB-GENE- 030616-581]	6.22e-22	3.93991	2.95762	5.12344	1.31791
rho	ENSDARG00000002193	rhodopsin [Source:ZFIN;Acc:ZDB-GENE-990415- 271]	6.25e-22	1.52658	1.45325	9.20797	7.61341
mt-nd2	ENSDARG00000063899	NADH dehydrogenase 2, mitochondrial [Source:ZFIN;Acc:ZDB-GENE-011205-8]	8.11e-22	1.33772	1.28758	10.0972	8.64255
pde6a	ENSDARG00000000380	phosphodiesterase 6A, cGMP-specific, rod, alpha [Source:ZFIN;Acc:ZDB-GENE-030616-42]	9.17e-22	2.22252	2.00615	6.54589	4.24379
gsr	ENSDARG00000019236	glutathione reductase [Source:ZFIN;Acc:ZDB- GENE-050522-116]	9.17e-22	2.11881	1.92961	7.162	4.99777
ethe1	ENSDARG00000005713	ethylmalonic encephalopathy 1 [Source:ZFIN;Acc:ZDB-GENE-040426-2503]	2.29e-21	2.55954	2.23391	6.15655	3.53838
rabgap1l2	ENSDARG00000060315	RAB GTPase activating protein 1-like 2 [Source:ZFIN;Acc:ZDB-GENE-070912-414]	5.05e-21	2.2718	2.03451	6.40685	4.06928
AC024175.7	ENSDARG00000080718	No description	7e-21	1.31558	1.26577	9.58092	8.15128
mt-atp6	ENSDARG00000063911	ATP synthase 6, mitochondrial [Source:ZFIN;Acc:ZDB-GENE-011205-18]	9.48e-20	1.18861	1.14964	11.3479	10.1005
gfi1aa	ENSDARG00000020746	growth factor independent 1A transcription repressor a [Source:ZFIN;Acc:ZDB-GENE-050522-534]	1.37e-19	3.47575	2.68857	5.35669	1.85907
baiap2l2b	ENSDARG00000060933	BAI1-associated protein 2-like 2b [Source:ZFIN;Acc:ZDB-GENE-060503-339]	1.37e-19	3.07698	2.5007	6.00587	2.97082
si:dkeyp-110e4.11	ENSDARG00000071585	si:dkeyp-110e4.11 [Source:ZFIN;Acc:ZDB-GENE- 070424-267]	3.09e-19	3.18088	2.54275	5.90506	2.68803
si:rp71-68n21.12	ENSDARG00000077382	si:rp71-68n21.12 [Source:ZFIN;Acc:ZDB-GENE- 081105-169]	1.56e-18	3.61811	2.71003	5.24032	1.51442
hsp70l	ENSDARG00000055723	heat shock cognate 70-kd protein, like [Source:ZFIN;Acc:ZDB-GENE-050321-1]	2.18e-18	3.3399	2.59148	5.49281	2.09691
mpp4a	ENSDARG00000058222	membrane protein, palmitoylated 4a (MAGUK p55 subfamily member 4) [Source:ZFIN;Acc:ZDB-GENE-070912- 523]	3.11e-18	2.80639	2.32802	6.3212	3.46323
mt-co2	ENSDARG00000063908	cytochrome c oxidase II, mitochondrial [Source:ZFIN;Acc:ZDB-GENE-011205-15]	3.15e-18	1.14952	1.11137	11.4914	10.2681
prom1b	ENSDARG00000034007	prominin 1 b [Source:ZFIN;Acc:ZDB-GENE- 031003-1]	3.43e-18	1.79595	1.65674	7.0631	5.20573
syt5b	ENSDARG00000011640	synaptotagmin Vb [Source:ZFIN;Acc:ZDB-GENE- 050522-134]	5.73e-18	1.53925	1.44878	7.8696	6.25876
si:ch211-235m3.10	ENSDARG00000097665	si:ch211-235m3.10 [Source:ZFIN;Acc:ZDB-GENE- 131127-468]	6.82e-18	4.42683	2.93234	4.7646	0.353456
nrn1lb	ENSDARG00000061149	neuritin 1-like b [Source:ZFIN;Acc:ZDB-GENE- 081022-27]	7.39e-18	3.88003	2.78308	4.81437	0.961176
zgc:193593	ENSDARG00000078130	Uncharacterized protein [Source:UniProtKB/TrEMBL;Acc:E7FD79]	9.08e-18	2.57526	2.18794	5.78695	3.14702
ptmaa	ENSDARG00000021113	prothymosin, alpha a [Source:ZFIN;Acc:ZDB- GENE-030131-7647]	1.25e-17	1.30045	1.2439	8.93741	7.56254
samsn1a	ENSDARG00000054543	SAM domain, SH3 domain and nuclear localisation signals 1a [Source:ZFIN;Acc:ZDB-GENE-030131- 8639]	1.47e-17	2.2615	1.98675	6.67873	4.3681
AC024175.21	ENSDARG00000083312	No description	2.8e-17	1.64926	1.53479	10.1451	8.95914
pgd	ENSDARG00000015343	phosphogluconate dehydrogenase [Source:ZFIN;Acc:ZDB-GENE-040426-2807]	4.87e-17	1.46001	1.37836	7.9172	6.38698
ptprq	ENSDARG00000008849	protein tyrosine phosphatase, receptor type, Q [Source:ZFIN;Acc:ZDB-GENE-050419-183]	5.35e-17	2.76878	2.27968	5.97317	3.18803
grk1b	ENSDARG00000104685	G protein-coupled receptor kinase 1 b [Source:ZFIN;Acc:ZDB-GENE-050417-211]	5.59e-17	1.55836	1.45946	7.44052	5.80878
FO704846.1	ENSDARG00000103023	No description	5.64e-17	3.0908	2.4363	5.74815	2.84298
guca1b	ENSDARG00000013393	guanylate cyclase activator 1B [Source:ZFIN;Acc:ZDB-GENE-011128-6]	7.6e-17	4.91136	3.00579	4.53652	-0.204283
rgs16	ENSDARG00000040177	regulator of G-protein signaling 16 [Source:ZFIN;Acc:ZDB-GENE-050417-393]	8.49e-17	2.54608	2.15191	5.85387	3.27384
impdh1a	ENSDARG00000042336	IMP (inosine 5'-monophosphate) dehydrogenase 1a [Source:ZFIN;Acc:ZDB-GENE-040704-15]	1.08e-16	2.34594	2.02821	6.6522	4.30238
laptm4b	ENSDARG00000035870	lysosomal protein transmembrane 4 beta [Source:ZFIN;Acc:ZDB-GENE-030616-616]	1.95e-16	1.87324	1.70112	7.17773	5.24885
tbx2a	ENSDARG00000018025	T-box 2a [Source:ZFIN;Acc:ZDB-GENE-990917- 4]	2.44e-16	1.73277	1.59396	7.1126	5.31442
si:ch211-214j8.15	ENSDARG00000094488	si:ch211-214j8.15 [Source:ZFIN;Acc:ZDB-GENE- 060526-103]	2.46e-16	2.06675	1.83879	6.26141	4.12605
rs1a	ENSDARG00000027236	retinoschisin 1a [Source:ZFIN;Acc:ZDB-GENE- 040801-171]	3.74e-16	2.38069	2.04082	5.80346	3.3421
gstp2	ENSDARG00000103019	glutathione S-transferase pi 2 [Source:ZFIN;Acc:ZDB-GENE-050601-1]	4.56e-16	2.14989	1.89178	6.18196	3.94075
twf2b	ENSDARG00000009727	twinfilin actin-binding protein 2b [Source:ZFIN;Acc:ZDB-GENE-050522-238]	4.94e-16	3.19736	2.45348	5.17187	2.0575
lrit1a	ENSDARG00000019179	leucine-rich repeat, immunoglobulin-like and transmembrane domains 1a [Source:ZFIN;Acc:ZDB-GENE-040924- 5]	6.04e-16	3.24012	2.46584	5.27497	2.00041
arr3b	ENSDARG00000098475	arrestin 3b, retinal (X-arrestin) [Source:ZFIN;Acc:ZDB-GENE-030616-74]	8.65e-16	1.64192	1.51888	8.0138	6.28677
grk1a	ENSDARG00000058803	G protein-coupled receptor kinase 1 a [Source:ZFIN;Acc:ZDB-GENE-050823-1]	8.98e-16	2.15843	1.89299	6.18914	3.94005
loxhd1a	ENSDARG00000094738	lipoxygenase homology domains 1a [Source:ZFIN;Acc:ZDB-GENE-091112-20]	1.07e-15	2.83458	2.2792	5.54152	2.7633
avil	ENSDARG00000059342	advillin [Source:ZFIN;Acc:ZDB-GENE-060421- 6683]	1.08e-15	3.30274	2.48102	5.19915	1.75415
hsp70.3	ENSDARG00000021924	heat shock cognate 70-kd protein, tandem duplicate 3 [Source:ZFIN;Acc:ZDB-GENE-110713-1]	1.54e-15	3.67117	2.59262	5.0633	1.36974
gng13b	ENSDARG00000037921	guanine nucleotide binding protein (G protein), gamma 13b [Source:ZFIN;Acc:ZDB-GENE-040718-97]	2.11e-15	2.23895	1.93943	5.96533	3.62627
gngt2b	ENSDARG00000103543	guanine nucleotide binding protein (G protein), gamma transducing activity polypeptide 2b [Source:ZFIN;Acc:ZDB-GENE-091020-4]	2.49e-15	1.50576	1.40704	8.07644	6.51295
gfi1ab	ENSDARG00000044457	growth factor independent 1A transcription repressor b [Source:ZFIN;Acc:ZDB-GENE-040116-8]	3.09e-15	3.16469	2.41266	4.92034	1.82336
si:ch73-28h20.1	ENSDARG00000098392	si:ch73-28h20.1 [Source:ZFIN;Acc:ZDB-GENE- 141216-463]	3.18e-15	1.85461	1.67505	6.36193	4.42683
cabp2b	ENSDARG00000052277	calcium binding protein 2b [Source:ZFIN;Acc:ZDB-GENE-081028-55]	3.31e-15	2.60028	2.14651	5.50826	2.83912
loxhd1b	ENSDARG00000074638	lipoxygenase homology domains 1b [Source:ZFIN;Acc:ZDB-GENE-081104-370]	7.59e-15	2.49534	2.08086	5.54399	3.01891
cd164l2	ENSDARG00000096327	CD164 sialomucin-like 2 [Source:ZFIN;Acc:ZDB- GENE-120215-174]	8.22e-15	4.00523	2.65577	4.53814	0.419681
si:dkey-96l17.6	ENSDARG00000094540	si:dkey-96l17.6 [Source:ZFIN;Acc:ZDB-GENE- 060526-350]	9.63e-15	3.69658	2.5618	4.88049	1.38567
opn1sw2	ENSDARG00000017274	opsin 1 (cone pigments), short-wave- sensitive 2 [Source:ZFIN;Acc:ZDB-GENE-990604-40]	9.92e-15	1.37618	1.29709	7.5904	6.22858
si:ch211-195b13.1	ENSDARG00000016623	si:ch211-195b13.1 [Source:ZFIN;Acc:ZDB-GENE- 030131-7626]	9.96e-15	1.68605	1.5446	6.99015	5.22185
hmgb2b	ENSDARG00000053990	high mobility group box 2b [Source:ZFIN;Acc:ZDB-GENE-040912-122]	1.34e-14	1.26966	1.20642	8.41438	7.07762
zgc:193593	ENSDARG00000078130	Uncharacterized protein [Source:UniProtKB/TrEMBL;Acc:E7FD79]	1.62e-14	2.1829	1.88843	5.87183	3.61161
si:ch73-367p23.2	ENSDARG00000096257	si:ch73-367p23.2 [Source:ZFIN;Acc:ZDB-GENE- 120215-61]	1.97e-14	1.13086	1.08523	9.37613	8.17138
gucy2f	ENSDARG00000025504	guanylate cyclase 2F, retinal [Source:ZFIN;Acc:ZDB-GENE-011128-7]	2.86e-14	2.11283	1.83964	5.83957	3.6316
hprt1l	ENSDARG00000014866	hypoxanthine phosphoribosyltransferase 1, like [Source:ZFIN;Acc:ZDB-GENE-040625-17]	4.64e-14	2.21959	1.9031	5.74344	3.46638
si:ch211-172l8.4	ENSDARG00000101577	si:ch211-172l8.4 [Source:ZFIN;Acc:ZDB-GENE- 131127-224]	4.66e-14	3.36454	2.43456	4.73181	1.28721
cdhr1a	ENSDARG00000004643	cadherin-related family member 1a [Source:ZFIN;Acc:ZDB-GENE-040924-4]	4.66e-14	1.7912	1.61619	6.32529	4.45905
fabp7a	ENSDARG00000007697	fatty acid binding protein 7, brain, a [Source:ZFIN;Acc:ZDB-GENE-000627-1]	4.88e-14	1.42929	1.33698	7.26913	5.76839
calm2b	ENSDARG00000015050	calmodulin 2b, (phosphorylase kinase, delta) [Source:ZFIN;Acc:ZDB-GENE-020415-2]	5.15e-14	0.999951	0.96721	10.1834	9.11262
sult5a1	ENSDARG00000007769	sulfotransferase family 5A, member 1 [Source:ZFIN;Acc:ZDB-GENE-060929-978]	5.41e-14	3.03555	2.31049	7.32786	6.43698
tktb	ENSDARG00000006019	transketolase b [Source:ZFIN;Acc:ZDB-GENE- 030909-13]	1.1e-13	1.19215	1.1362	8.26276	6.99035
MAL (3 of 3)	ENSDARG00000070401	mal, T-cell differentiation protein [Source:HGNC Symbol;Acc:HGNC:6817]	1.15e-13	2.70733	2.15599	5.47986	2.69455
mt-nd5	ENSDARG00000063921	NADH dehydrogenase 5, mitochondrial [Source:ZFIN;Acc:ZDB-GENE-011205-12]	1.22e-13	1.15579	1.10449	10.9058	9.59993
prph2a	ENSDARG00000038018	peripherin 2a (retinal degeneration, slow) [Source:ZFIN;Acc:ZDB-GENE-000616-8]	1.64e-13	1.61545	1.47986	7.06058	5.35645
hnrnpa1b	ENSDARG00000036675	heterogeneous nuclear ribonucleoprotein A1b [Source:ZFIN;Acc:ZDB-GENE-030912-14]	2.66e-13	1.31642	1.23983	7.60699	6.24301
txnipa	ENSDARG00000036107	thioredoxin interacting protein a [Source:ZFIN;Acc:ZDB-GENE-030804-10]	2.92e-13	1.19771	1.13927	8.32277	7.05806
irbp	ENSDARG00000059163	interphotoreceptor retinoid-binding protein [Source:ZFIN;Acc:ZDB-GENE-990415-132]	3.88e-13	1.50706	1.3929	6.90304	5.33296
glula	ENSDARG00000099776	glutamate-ammonia ligase (glutamine synthase) a [Source:ZFIN;Acc:ZDB-GENE-030131-688]	4.15e-13	1.11257	1.06491	8.64383	7.45699
mt-co3	ENSDARG00000063912	cytochrome c oxidase III, mitochondrial [Source:ZFIN;Acc:ZDB-GENE-011205-16]	5.03e-13	0.960662	0.929437	10.5627	9.54472
AC024175.14	ENSDARG00000082084	No description	5.05e-13	1.33209	1.25122	8.74146	7.30764
efna1b	ENSDARG00000018787	ephrin-A1b [Source:ZFIN;Acc:ZDB-GENE-041007- 5]	6.35e-13	2.09834	1.8063	5.76035	3.57109
kcnj1a.6	ENSDARG00000088484	potassium inwardly-rectifying channel, subfamily J, member 1a, tandem duplicate 6 [Source:ZFIN;Acc:ZDB-GENE-050420-272]	9.25e-13	2.66324	2.10597	5.27388	2.57333
neflb	ENSDARG00000012426	neurofilament, light polypeptide b [Source:ZFIN;Acc:ZDB-GENE-060312-44]	1e-12	2.24917	1.89146	6.20246	3.9536
spock3	ENSDARG00000070266	sparc/osteonectin, cwcv and kazal-like domains proteoglycan (testican) 3 [Source:ZFIN;Acc:ZDB- GENE-090311-24]	1.01e-12	1.34344	1.25875	7.34547	5.92743
abcb6a	ENSDARG00000063297	ATP-binding cassette, sub-family B (MDR/TAP), member 6a [Source:ZFIN;Acc:ZDB-GENE-050517-9]	1.18e-12	1.71907	1.54758	6.55801	4.71132
AC024175.20	ENSDARG00000083118	No description	1.28e-12	1.21385	1.15017	9.04161	7.7244
trpm5	ENSDARG00000059792	transient receptor potential cation channel, subfamily M, member 5 [Source:ZFIN;Acc:ZDB-GENE-060503- 736]	1.67e-12	2.74418	2.13285	5.09017	2.22574
si:dkey-81h8.1	ENSDARG00000094074	si:dkey-81h8.1 [Source:ZFIN;Acc:ZDB-GENE- 060503-931]	1.98e-12	1.15274	1.09711	8.49665	7.70755
cabp5b	ENSDARG00000028485	calcium binding protein 5b [Source:ZFIN;Acc:ZDB-GENE-050522-146]	2.61e-12	3.96728	2.48112	4.18408	0.186397
dfnb59	ENSDARG00000079945	deafness, autosomal recessive 59 [Source:ZFIN;Acc:ZDB-GENE-110411-133]	2.61e-12	3.62775	2.40801	4.37857	0.788164
MAL (2 of 3)	ENSDARG00000043442	mal, T-cell differentiation protein [Source:HGNC Symbol;Acc:HGNC:6817]	2.73e-12	2.61341	2.06581	5.44968	2.76526
si:ch1073-358o18.3	ENSDARG00000097369	si:ch1073-358o18.3 [Source:ZFIN;Acc:ZDB-GENE- 131121-198]	3.15e-12	3.03906	2.23549	4.71122	1.61161
grk7a	ENSDARG00000020602	G protein-coupled receptor kinase 7a [Source:ZFIN;Acc:ZDB-GENE-050824-1]	3.51e-12	1.30824	1.2265	7.47572	6.09504
bdnf	ENSDARG00000018817	brain-derived neurotrophic factor [Source:ZFIN;Acc:ZDB-GENE-000412-1]	3.93e-12	1.81484	1.60769	6.2012	4.31165
camk2n2	ENSDARG00000090424	calcium/calmodulin-dependent protein kinase II inhibitor 2 [Source:ZFIN;Acc:ZDB-GENE-040718-389]	5.37e-12	2.28315	1.89239	5.6131	3.2469
CR391998.1	ENSDARG00000091817	Uncharacterized protein [Source:UniProtKB/TrEMBL;Acc:E7FGR0]	5.77e-12	2.57808	2.03931	5.05525	2.4051
si:dkey-61n16.5	ENSDARG00000099695	si:dkey-61n16.5 [Source:ZFIN;Acc:ZDB-GENE- 100922-235]	5.92e-12	2.16843	1.82715	5.52748	3.2768
si:dkey-16m19.1	ENSDARG00000097176	No description	5.99e-12	3.11411	2.24748	4.54976	1.40932
rgs1	ENSDARG00000089077	regulator of G-protein signaling 1 [Source:ZFIN;Acc:ZDB-GENE-070705-145]	6e-12	4.16324	2.48854	4.06865	-0.11932
h1f0	ENSDARG00000038559	H1 histone family, member 0 [Source:ZFIN;Acc:ZDB-GENE-030131-337]	6.25e-12	1.29197	1.21152	7.4138	6.0519
mt2	ENSDARG00000041623	metallothionein 2 [Source:ZFIN;Acc:ZDB-GENE- 030131-4174]	7.56e-12	2.51385	2.00503	5.14082	2.53662
guk1b	ENSDARG00000005776	guanylate kinase 1b [Source:ZFIN;Acc:ZDB- GENE-020916-1]	9.42e-12	1.96866	1.70207	5.69052	3.65805
AIFM2	ENSDARG00000077549	apoptosis-inducing factor, mitochondrion- associated, 2 [Source:HGNC Symbol;Acc:HGNC:21411]	1.02e-11	1.70686	1.52664	6.37896	4.61652
snx8b	ENSDARG00000078057	sorting nexin 8b [Source:ZFIN;Acc:ZDB-GENE- 090313-317]	1.43e-11	2.80436	2.11621	5.31153	2.40409
scg3	ENSDARG00000086288	secretogranin III [Source:ZFIN;Acc:ZDB-GENE- 040426-1725]	1.49e-11	1.18881	1.12356	8.22126	6.95297
prph2b	ENSDARG00000014840	peripherin 2b (retinal degeneration, slow) [Source:ZFIN;Acc:ZDB-GENE-000616-9]	1.56e-11	1.34595	1.25254	7.84418	6.41531
erich3	ENSDARG00000069262	glutamate-rich 3 [Source:ZFIN;Acc:ZDB-GENE- 070209-295]	1.94e-11	2.9402	2.15787	5.03826	2.05619
pde6c	ENSDARG00000100397	phosphodiesterase 6C, cGMP-specific, cone, alpha prime [Source:ZFIN;Acc:ZDB-GENE-040426-1664]	1.94e-11	0.970254	0.93378	9.36995	8.33622
ndrg1b	ENSDARG00000010420	N-myc downstream regulated 1b [Source:ZFIN;Acc:ZDB-GENE-040426-1648]	2.88e-11	2.36023	1.91017	5.54317	3.16138
TUBB4A (2 of 3)	ENSDARG00000041723	tubulin, beta 4A class IVa [Source:HGNC Symbol;Acc:HGNC:20774]	2.88e-11	1.77366	1.56598	6.03655	4.17538
tekt3	ENSDARG00000045038	tektin 3 [Source:ZFIN;Acc:ZDB-GENE-080130- 2]	2.89e-11	2.87554	2.13108	4.65785	1.89392
rorca	ENSDARG00000057231	RAR-related orphan receptor C a [Source:ZFIN;Acc:ZDB-GENE-990415-250]	3.06e-11	1.13726	1.07835	7.79864	6.58858
me1	ENSDARG00000053215	malic enzyme 1, NADP(+)-dependent, cytosolic [Source:ZFIN;Acc:ZDB-GENE-061013-438]	3.46e-11	2.38564	1.92045	5.22936	3.0184
tpmt.2	ENSDARG00000028012	thiopurine S-methyltransferase, tandem duplicate 2 [Source:ZFIN;Acc:ZDB-GENE-041010-177]	3.49e-11	2.39229	1.92371	5.12352	2.67302
rgs11	ENSDARG00000037646	regulator of G-protein signaling 11 [Source:ZFIN;Acc:ZDB-GENE-080220-46]	3.66e-11	2.32108	1.8876	5.24787	2.83201
crygm2d11	ENSDARG00000069827	crystallin, gamma M2d11 [Source:ZFIN;Acc:ZDB- GENE-071004-42]	3.93e-11	1.38429	1.27965	6.82996	5.37228
gapdhs	ENSDARG00000039914	glyceraldehyde-3-phosphate dehydrogenase, spermatogenic [Source:ZFIN;Acc:ZDB-GENE-020913-1]	4.8e-11	1.07241	1.02186	8.40668	7.25938
ak7b	ENSDARG00000017023	adenylate kinase 7b [Source:ZFIN;Acc:ZDB- GENE-050309-170]	5.45e-11	2.87054	2.11209	4.83013	1.93455
pde6h	ENSDARG00000102558	phosphodiesterase 6H, cGMP-specific, cone, gamma [Source:ZFIN;Acc:ZDB-GENE-040426-1754]	5.45e-11	1.66168	1.48438	6.29608	4.60699
mt-cyb	ENSDARG00000063924	cytochrome b, mitochondrial [Source:ZFIN;Acc:ZDB-GENE-011205-17]	5.45e-11	0.9979	0.956702	10.4098	9.22786
ncaldb	ENSDARG00000011334	neurocalcin delta b [Source:ZFIN;Acc:ZDB- GENE-040808-37]	5.78e-11	1.40892	1.29726	6.77159	5.28907
tmc2a	ENSDARG00000033104	transmembrane channel-like 2a [Source:ZFIN;Acc:ZDB-GENE-060526-280]	6.54e-11	2.66627	2.03303	4.96554	2.26404
anks3	ENSDARG00000038557	ankyrin repeat and sterile alpha motif domain containing 3 [Source:ZFIN;Acc:ZDB-GENE-080204-51]	6.72e-11	1.18203	1.1141	7.69493	6.79215
nyx	ENSDARG00000061791	nyctalopin [Source:ZFIN;Acc:ZDB-GENE-061026- 3]	7.15e-11	3.93972	2.34032	4.17821	0.325164
mfsd2b	ENSDARG00000030263	major facilitator superfamily domain containing 2B [Source:ZFIN;Acc:ZDB-GENE-041210-308]	7.67e-11	2.46024	1.94269	5.16289	2.63853
slc38a5a	ENSDARG00000009901	solute carrier family 38, member 5a [Source:ZFIN;Acc:ZDB-GENE-081105-92]	8.1e-11	1.62348	1.45477	6.40926	4.71908
AC024175.15	ENSDARG00000082123	No description	9.26e-11	1.27202	1.18708	8.91136	7.606
AC024175.16	ENSDARG00000082716	No description	9.31e-11	1.26263	1.17945	8.9721	7.66384
mt-nd4	ENSDARG00000063917	NADH dehydrogenase 4, mitochondrial [Source:ZFIN;Acc:ZDB-GENE-011205-10]	1.06e-10	1.25771	1.17505	9.68836	8.41906
trpm1a	ENSDARG00000011259	transient receptor potential cation channel, subfamily M, member 1a [Source:ZFIN;Acc:ZDB-GENE-070112- 1372]	1.08e-10	2.38246	1.89979	6.01919	3.57325
si:ch73-124g13.5	ENSDARG00000105248	si:ch73-124g13.5 [Source:ZFIN;Acc:ZDB-GENE- 100922-191]	1.2e-10	4.31547	2.35886	4.02414	-0.593087
zfand2a	ENSDARG00000103511	zinc finger, AN1-type domain 2A [Source:ZFIN;Acc:ZDB-GENE-040426-1596]	1.28e-10	1.67195	1.48576	6.13238	4.37597
AC024175.8	ENSDARG00000081280	No description	1.43e-10	1.23741	1.15762	8.84101	7.57452
rcv1	ENSDARG00000019902	recoverin [Source:ZFIN;Acc:ZDB-GENE-030131- 7590]	1.58e-10	1.85312	1.60376	6.61311	4.71729
cabp2a	ENSDARG00000052016	calcium binding protein 2a [Source:ZFIN;Acc:ZDB-GENE-050913-25]	2.43e-10	2.96897	2.10737	4.7428	1.7309
EIF1B	ENSDARG00000029445	eukaryotic translation initiation factor 1B [Source:HGNC Symbol;Acc:HGNC:30792]	2.46e-10	1.38061	1.2692	6.64972	5.20453
LIMA1	ENSDARG00000101441	LIM domain and actin binding 1 [Source:HGNC Symbol;Acc:HGNC:24636]	2.46e-10	1.01551	0.96947	8.96251	8.62273
rcvrna	ENSDARG00000052223	recoverin a [Source:ZFIN;Acc:ZDB-GENE-050913- 106]	2.52e-10	1.46444	1.33258	6.86841	5.34401
gabrr1	ENSDARG00000043902	gamma-aminobutyric acid (GABA) A receptor, rho 1 [Source:ZFIN;Acc:ZDB-GENE-040724-212]	2.6e-10	3.01293	2.11232	5.15345	2.29759
dusp2	ENSDARG00000098108	dual specificity phosphatase 2 [Source:ZFIN;Acc:ZDB-GENE-040801-188]	2.64e-10	2.80538	2.05385	4.75215	1.85346
atp1b2b	ENSDARG00000034424	ATPase, Na+/K+ transporting, beta 2b polypeptide [Source:ZFIN;Acc:ZDB-GENE-010718-1]	3e-10	1.63777	1.45609	7.02015	5.36025
hsp90aa1.2	ENSDARG00000024746	heat shock protein 90, alpha (cytosolic), class A member 1, tandem duplicate 2 [Source:ZFIN;Acc:ZDB- GENE-031001-3]	3e-10	1.04249	0.992375	9.76469	8.63928
hpdb	ENSDARG00000044935	4-hydroxyphenylpyruvate dioxygenase b [Source:ZFIN;Acc:ZDB-GENE-040808-62]	3.32e-10	1.19477	1.12015	7.33077	6.05483
GABARAPL1	ENSDARG00000040971	GABA(A) receptor-associated protein like 1 [Source:HGNC Symbol;Acc:HGNC:4068]	3.41e-10	1.62797	1.44849	6.43708	5.11905
s100s	ENSDARG00000036773	S100 calcium binding protein S [Source:ZFIN;Acc:ZDB-GENE-040822-31]	3.47e-10	2.11579	1.74872	5.60682	3.57333
atp5ib	ENSDARG00000068940	ATP synthase, H+ transporting, mitochondrial Fo complex, subunit Eb [Source:ZFIN;Acc:ZDB-GENE-051130- 1]	3.61e-10	1.18209	1.10946	7.65421	6.41071
gem	ENSDARG00000029112	GTP binding protein overexpressed in skeletal muscle [Source:ZFIN;Acc:ZDB-GENE-060825-251]	4.46e-10	2.62114	1.97557	4.97151	2.29572
OSBPL1A (1 of 2)	ENSDARG00000053746	oxysterol binding protein-like 1A [Source:HGNC Symbol;Acc:HGNC:16398]	5e-10	2.52554	1.93676	4.82597	2.23398
cox4i1	ENSDARG00000032970	cytochrome c oxidase subunit IV isoform 1 [Source:ZFIN;Acc:ZDB-GENE-030131-5175]	5.03e-10	1.06628	1.01162	7.96458	6.82682
rps17	ENSDARG00000104011	ribosomal protein S17 [Source:ZFIN;Acc:ZDB- GENE-040426-1852]	6.21e-10	1.08369	1.02591	7.76915	6.6215
si:dkey-287h13.1	ENSDARG00000069011	si:dkey-287h13.1 [Source:ZFIN;Acc:ZDB-GENE- 060503-164]	6.64e-10	3.42614	2.18796	4.14265	2.46527
si:ch211-243g18.2	ENSDARG00000044261	si:ch211-243g18.2 [Source:ZFIN;Acc:ZDB-GENE- 030131-2830]	6.99e-10	1.49427	1.34894	7.40141	5.81599
cycsb	ENSDARG00000044562	cytochrome c, somatic b [Source:ZFIN;Acc:ZDB- GENE-040625-38]	7.09e-10	1.07711	1.01998	8.3381	7.19344
ppdpfb	ENSDARG00000031317	pancreatic progenitor cell differentiation and proliferation factor b [Source:ZFIN;Acc:ZDB-GENE- 030131-8247]	7.09e-10	1.043	0.99097	7.89405	6.76937
calm1b	ENSDARG00000034187	calmodulin 1b [Source:ZFIN;Acc:ZDB-GENE- 030804-2]	7.16e-10	1.17517	1.10168	8.09462	6.85235
myo1ha	ENSDARG00000061968	myosin IHa [Source:ZFIN;Acc:ZDB-GENE-060531- 78]	7.63e-10	2.74596	2.00384	5.34531	2.67316
CD99L2 (3 of 3)	ENSDARG00000087508	CD99 molecule-like 2 [Source:HGNC Symbol;Acc:HGNC:18237]	7.98e-10	1.06967	1.01338	8.70948	7.5572
mt-co1	ENSDARG00000063905	cytochrome c oxidase I, mitochondrial [Source:ZFIN;Acc:ZDB-GENE-011205-14]	7.98e-10	0.87193	0.840897	11.9277	10.9698
AC024175.22	ENSDARG00000083462	No description	9.02e-10	1.08939	1.02973	7.89405	6.73219
anp32e	ENSDARG00000054804	acidic (leucine-rich) nuclear phosphoprotein 32 family, member E [Source:ZFIN;Acc:ZDB-GENE-040426- 2448]	9.14e-10	0.997488	0.951248	9.39239	8.32025
arr3a	ENSDARG00000056511	arrestin 3a, retinal (X-arrestin) [Source:ZFIN;Acc:ZDB-GENE-040718-102]	9.16e-10	1.14437	1.07554	9.07515	7.87333
AC024175.5	ENSDARG00000080401	No description	9.75e-10	1.86717	1.5944	9.56781	8.17121
nr1d2b	ENSDARG00000009594	nuclear receptor subfamily 1, group D, member 2b [Source:ZFIN;Acc:ZDB-GENE-990415-244]	1.3e-09	1.02509	0.974272	8.32802	7.22397
vamp1	ENSDARG00000031283	vesicle-associated membrane protein 1 [Source:ZFIN;Acc:ZDB-GENE-040426-2725]	1.44e-09	1.67011	1.46604	6.36221	4.70004
htatip2	ENSDARG00000028386	HIV-1 Tat interactive protein 2 [Source:ZFIN;Acc:ZDB-GENE-001219-1]	1.45e-09	1.58903	1.41108	6.29062	4.64393
sv2ba	ENSDARG00000057427	synaptic vesicle glycoprotein 2Ba [Source:ZFIN;Acc:ZDB-GENE-070209-134]	1.45e-09	1.209	1.1268	7.61275	6.33837
sh3bgrl2	ENSDARG00000036878	SH3 domain binding glutamate-rich protein like 2 [Source:ZFIN;Acc:ZDB-GENE-040704-38]	1.56e-09	2.39349	1.8579	5.03017	2.70207
bc2	ENSDARG00000053979	putative breast adenocarcinoma marker [Source:ZFIN;Acc:ZDB-GENE-040426-2922]	1.59e-09	1.13348	1.06487	7.35778	6.15549
sv2bb	ENSDARG00000060711	synaptic vesicle glycoprotein 2Bb [Source:ZFIN;Acc:ZDB-GENE-030131-2789]	1.64e-09	1.34443	1.23255	6.57837	5.16374
hmgb2a	ENSDARG00000029722	high mobility group box 2a [Source:ZFIN;Acc:ZDB-GENE-051120-126]	1.67e-09	1.05469	0.998841	9.16903	8.04502
calb2b	ENSDARG00000036344	calbindin 2b [Source:ZFIN;Acc:ZDB-GENE- 040426-1668]	1.73e-09	1.7877	1.53958	6.83234	4.9828
SNORD59	ENSDARG00000081030	Small nucleolar RNA SNORD59 [Source:RFAM;Acc:RF00273]	1.82e-09	0.877996	0.845118	9.50171	8.54973
arhgef25b	ENSDARG00000014465	Rho guanine nucleotide exchange factor (GEF) 25b [Source:ZFIN;Acc:ZDB-GENE-080225-17]	2.06e-09	2.02856	1.67735	5.52903	3.56092
isl1	ENSDARG00000004023	ISL LIM homeobox 1 [Source:ZFIN;Acc:ZDB-GENE- 980526-112]	2.1e-09	1.61644	1.4268	6.44762	4.79792
osbpl1a	ENSDARG00000105147	oxysterol binding protein-like 1A [Source:ZFIN;Acc:ZDB-GENE-050208-657]	2.38e-09	1.23796	1.14801	6.87325	5.56877
zgc:158387	ENSDARG00000033364	zgc:158387 [Source:ZFIN;Acc:ZDB-GENE-061215- 48]	2.41e-09	1.26497	1.16923	6.92645	5.58014
cacna2d4b	ENSDARG00000023886	calcium channel, voltage-dependent, alpha 2/delta subunit 4b [Source:ZFIN;Acc:ZDB-GENE-100422-18]	2.89e-09	1.52853	1.364	6.64289	5.02571
tnnc1b	ENSDARG00000037539	troponin C type 1b (slow) [Source:ZFIN;Acc:ZDB-GENE-040625-62]	2.95e-09	1.13765	1.06636	7.61954	6.40042
si:ch211-81a5.8	ENSDARG00000070972	si:ch211-81a5.8 [Source:ZFIN;Acc:ZDB-GENE- 060503-138]	3.02e-09	2.16695	1.74286	5.00348	2.78816
AC024175.24	ENSDARG00000083519	No description	3.08e-09	0.844592	0.814514	10.5327	9.61233
ppp1r18	ENSDARG00000071251	protein phosphatase 1, regulatory subunit 18 [Source:ZFIN;Acc:ZDB-GENE-060503-350]	3.36e-09	1.58763	1.40359	6.29596	4.65123
chmp5b	ENSDARG00000103718	charged multivesicular body protein 5b [Source:ZFIN;Acc:ZDB-GENE-040426-1374]	3.88e-09	1.23961	1.14734	7.12903	5.8062
hsp70.2	ENSDARG00000092362	heat shock cognate 70-kd protein, tandem duplicate 2 [Source:ZFIN;Acc:ZDB-GENE-110405-1]	4.07e-09	2.85644	1.99221	4.73928	1.77087
itm2ba	ENSDARG00000007098	integral membrane protein 2Ba [Source:ZFIN;Acc:ZDB-GENE-030131-2352]	4.14e-09	1.04203	0.985828	7.77905	6.66138
cbr1l	ENSDARG00000021149	carbonyl reductase 1-like [Source:ZFIN;Acc:ZDB-GENE-030131-9642]	4.15e-09	1.95122	1.62547	5.55289	3.49589
rsrp1	ENSDARG00000030440	arginine/serine-rich protein 1 [Source:ZFIN;Acc:ZDB-GENE-060616-210]	4.34e-09	0.980767	0.933489	7.99841	6.94009
kcnv2a	ENSDARG00000076644	potassium channel, subfamily V, member 2a [Source:ZFIN;Acc:ZDB-GENE-091117-27]	4.83e-09	3.50553	2.11788	3.96388	1.0268
grinaa	ENSDARG00000101317	glutamate receptor, ionotropic, N-methyl D- aspartate-associated protein 1a (glutamate binding) [Source:ZFIN;Acc:ZDB-GENE-060616-231]	5e-09	1.66677	1.45268	5.81276	4.07952
apom	ENSDARG00000076838	apolipoprotein M [Source:ZFIN;Acc:ZDB-GENE- 010605-5]	5e-09	1.08759	1.0234	7.39128	6.23246
anxa5a	ENSDARG00000026406	annexin A5a [Source:ZFIN;Acc:ZDB-GENE-080220- 29]	5.18e-09	2.2353	1.7647	5.21751	2.87838
zgc:193505	ENSDARG00000093584	zgc:193505 [Source:ZFIN;Acc:ZDB-GENE-030131- 7103]	6.1e-09	1.63958	1.43312	5.85936	4.16855
zgc:136930	ENSDARG00000055192	zgc:136930 [Source:ZFIN;Acc:ZDB-GENE-060312- 16]	6.1e-09	0.898708	0.86145	9.01371	8.03644
nr2e3	ENSDARG00000045904	nuclear receptor subfamily 2, group E, member 3 [Source:ZFIN;Acc:ZDB-GENE-041114-63]	6.5e-09	2.15147	1.72199	4.99751	2.78436
s100z	ENSDARG00000038729	S100 calcium binding protein Z [Source:ZFIN;Acc:ZDB-GENE-050522-69]	6.56e-09	3.06917	2.02621	4.44269	1.36036
opn1sw1	ENSDARG00000045677	opsin 1 (cone pigments), short-wave- sensitive 1 [Source:ZFIN;Acc:ZDB-GENE-991109-25]	6.57e-09	0.832982	0.803016	9.29796	8.396
ppp1r3cb	ENSDARG00000014554	protein phosphatase 1, regulatory subunit 3Cb [Source:ZFIN;Acc:ZDB-GENE-040426-1733]	6.62e-09	1.30631	1.19641	6.56532	5.18668
rplp2	ENSDARG00000101406	ribosomal protein, large P2 [Source:ZFIN;Acc:ZDB-GENE-031018-2]	7.22e-09	1.04074	0.983168	9.09101	7.99351
cx35b	ENSDARG00000070781	connexin 35b [Source:ZFIN;Acc:ZDB-GENE- 030911-1]	7.44e-09	2.2063	1.74498	5.01912	2.68311
rps18	ENSDARG00000100392	ribosomal protein S18 [Source:ZFIN;Acc:ZDB- GENE-020419-20]	7.78e-09	0.952051	0.907417	9.39428	8.37556
fkbp16	ENSDARG00000001976	FK506 binding protein 16 [Source:ZFIN;Acc:ZDB-GENE-050208-116]	8.32e-09	1.75448	1.50227	5.78959	4.00306
rtn4rl2b	ENSDARG00000037495	reticulon 4 receptor-like 2b [Source:ZFIN;Acc:ZDB-GENE-040310-2]	8.36e-09	3.17789	2.04398	4.0898	0.839449
pou4f3	ENSDARG00000006206	POU class 4 homeobox 3 [Source:ZFIN;Acc:ZDB- GENE-990415-24]	8.47e-09	2.83559	1.96665	4.36706	1.46564
si:dkey-103g5.4	ENSDARG00000089200	si:dkey-103g5.4 [Source:ZFIN;Acc:ZDB-GENE- 131127-503]	9.3e-09	2.39268	1.81913	5.14136	3.47829
kcnj1a.5	ENSDARG00000089060	potassium inwardly-rectifying channel, subfamily J, member 1a, tandem duplicate 5 [Source:ZFIN;Acc:ZDB-GENE-050420-120]	1.06e-08	2.93131	1.98383	4.24479	1.28436
keap1a	ENSDARG00000016132	kelch-like ECH-associated protein 1a [Source:ZFIN;Acc:ZDB-GENE-030131-556]	1.09e-08	1.5626	1.37687	5.86355	4.24129
gngt1	ENSDARG00000035798	guanine nucleotide binding protein (G protein), gamma transducing activity polypeptide 1 [Source:ZFIN;Acc:ZDB-GENE-030131-7596]	1.15e-08	1.66079	1.44059	5.68808	3.96183
si:ch211-207l14.1	ENSDARG00000098376	si:ch211-207l14.1 [Source:ZFIN;Acc:ZDB-GENE- 120215-234]	1.17e-08	2.1942	1.73099	4.86717	2.59054
dnah5	ENSDARG00000087373	dynein, axonemal, heavy chain 5 [Source:ZFIN;Acc:ZDB-GENE-110411-177]	1.19e-08	1.58703	1.39232	5.95199	4.26649
stxbp1b	ENSDARG00000056036	syntaxin binding protein 1b [Source:ZFIN;Acc:ZDB-GENE-060531-166]	1.22e-08	1.01491	0.959976	7.58468	6.50405
atp1a3b	ENSDARG00000104139	ATPase, Na+/K+ transporting, alpha 3b polypeptide [Source:ZFIN;Acc:ZDB-GENE-001212-8]	1.23e-08	0.910616	0.870495	8.36173	7.37799
opn3	ENSDARG00000052775	opsin 3 [Source:ZFIN;Acc:ZDB-GENE-080227- 16]	1.24e-08	4.41394	2.1166	3.57014	-0.800605
plcd4a	ENSDARG00000057975	phospholipase C, delta 4a [Source:ZFIN;Acc:ZDB-GENE-050208-654]	1.27e-08	2.37458	1.80497	4.83108	2.37228
hk1	ENSDARG00000039452	hexokinase 1 [Source:ZFIN;Acc:ZDB-GENE- 040426-2848]	1.29e-08	0.999425	0.946717	8.06305	6.98496
naca	ENSDARG00000005513	nascent polypeptide-associated complex alpha subunit [Source:ZFIN;Acc:ZDB-GENE-020423-4]	1.29e-08	0.819639	0.79005	9.81955	8.92717
si:dkey-26i13.8	ENSDARG00000062606	si:dkey-26i13.8 [Source:ZFIN;Acc:ZDB-GENE- 090312-134]	1.43e-08	1.83105	1.54089	5.75871	3.86581
lactbl1b	ENSDARG00000070467	lactamase, beta-like 1b [Source:ZFIN;Acc:ZDB- GENE-061207-53]	1.44e-08	2.56476	1.86899	5.01224	2.34033
mtch2	ENSDARG00000019732	mitochondrial carrier homolog 2 [Source:ZFIN;Acc:ZDB-GENE-991008-9]	1.45e-08	1.15526	1.07479	6.98514	5.74481
AC024175.13	ENSDARG00000081938	No description	1.51e-08	1.72324	1.47645	9.65934	8.30141
cdc14aa	ENSDARG00000013858	cell division cycle 14Aa [Source:ZFIN;Acc:ZDB-GENE-040426-1214]	1.54e-08	2.34096	1.78679	5.09913	2.6963
fscn2b	ENSDARG00000074396	fascin actin-bundling protein 2b, retinal [Source:ZFIN;Acc:ZDB-GENE-040426-1740]	1.57e-08	1.70439	1.46438	5.65732	3.88629
upf3a	ENSDARG00000069297	UPF3 regulator of nonsense transcripts homolog A (yeast) [Source:ZFIN;Acc:ZDB-GENE-060721-2]	1.87e-08	1.11781	1.04365	7.07948	5.87175
mt-nd3	ENSDARG00000063914	NADH dehydrogenase 3, mitochondrial [Source:ZFIN;Acc:ZDB-GENE-011205-9]	1.89e-08	0.78464	0.758085	9.80437	8.94645
atf4b	ENSDARG00000038141	activating transcription factor 4b [Source:ZFIN;Acc:ZDB-GENE-070928-23]	2.03e-08	1.0692	1.00367	7.23369	6.07858
AC024175.18	ENSDARG00000082789	No description	2.32e-08	1.72504	1.4727	10.425	9.28988
paip2b	ENSDARG00000008706	poly(A) binding protein interacting protein 2B [Source:ZFIN;Acc:ZDB-GENE-040426-1736]	2.37e-08	1.02623	0.967563	7.57111	6.46584
aanat1	ENSDARG00000036567	arylalkylamine N-acetyltransferase 1 [Source:ZFIN;Acc:ZDB-GENE-040329-1]	2.43e-08	4.53841	2.05839	3.51484	-0.911802
ano1	ENSDARG00000102335	anoctamin 1, calcium activated chloride channel [Source:ZFIN;Acc:ZDB-GENE-121127-3]	2.43e-08	1.57948	1.38072	5.80354	4.17898
si:ch73-380n15.2	ENSDARG00000087224	si:ch73-380n15.2 [Source:ZFIN;Acc:ZDB-GENE- 090313-161]	2.44e-08	2.28784	1.75551	4.86422	2.47596
si:ch211-233a1.4	ENSDARG00000092752	si:ch211-233a1.4 [Source:ZFIN;Acc:ZDB-GENE- 060526-115]	2.49e-08	1.23673	1.13634	6.84846	5.53262
tmprss4a	ENSDARG00000103117	transmembrane protease, serine 4a [Source:ZFIN;Acc:ZDB-GENE-061103-631]	2.61e-08	1.64612	1.42265	5.84528	4.28386
aqp9b	ENSDARG00000053480	aquaporin 9b [Source:ZFIN;Acc:ZDB-GENE- 070911-1]	2.79e-08	1.32651	1.20343	6.65112	5.24601
crx	ENSDARG00000011989	cone-rod homeobox [Source:ZFIN;Acc:ZDB-GENE- 010403-1]	2.79e-08	1.23346	1.13325	6.69582	5.38939
calb2a	ENSDARG00000041062	calbindin 2a [Source:ZFIN;Acc:ZDB-GENE- 040426-1677]	2.8e-08	1.42297	1.27308	6.5751	5.06868
crygm2d20	ENSDARG00000091148	crystallin, gamma M2d20 [Source:ZFIN;Acc:ZDB- GENE-070424-32]	2.8e-08	0.923735	0.880075	8.55123	7.56128
aknad1	ENSDARG00000094414	AKNA domain containing 1 [Source:ZFIN;Acc:ZDB-GENE-070912-649]	2.94e-08	2.68941	1.88875	4.31662	1.71058
ppp1r15b	ENSDARG00000068128	protein phosphatase 1, regulatory subunit 15B [Source:ZFIN;Acc:ZDB-GENE-030829-40]	3.01e-08	2.35077	1.77535	4.71676	2.28436
fscn2a	ENSDARG00000059574	fascin actin-bundling protein 2a, retinal [Source:ZFIN;Acc:ZDB-GENE-110901-1]	3.07e-08	2.11818	1.67731	4.90139	2.70793
ubtd1a	ENSDARG00000007382	ubiquitin domain containing 1a [Source:ZFIN;Acc:ZDB-GENE-070424-93]	3.42e-08	2.44052	1.80523	4.58592	2.09381
frya	ENSDARG00000013921	furry homolog a (Drosophila) [Source:ZFIN;Acc:ZDB-GENE-060510-4]	3.43e-08	1.04308	0.980374	7.50607	6.39425
HAP1	ENSDARG00000074508	huntingtin-associated protein 1 [Source:HGNC Symbol;Acc:HGNC:4812]	3.46e-08	1.29171	1.17624	6.79218	5.41275
opn1lw2	ENSDARG00000044861	opsin 1 (cone pigments), long-wave- sensitive, 2 [Source:ZFIN;Acc:ZDB-GENE-040718-141]	3.55e-08	0.990875	0.936689	8.98657	7.89385
myo3a	ENSDARG00000010186	myosin IIIA [Source:ZFIN;Acc:ZDB-GENE-041026- 4]	3.92e-08	1.37071	1.23333	6.77425	5.34382
cirbpa	ENSDARG00000103672	cold inducible RNA binding protein a [Source:ZFIN;Acc:ZDB-GENE-050417-329]	4.44e-08	0.851501	0.81619	8.50453	7.57127
gabrr3b	ENSDARG00000030750	gamma-aminobutyric acid (GABA) A receptor, rho 3b [Source:ZFIN;Acc:ZDB-GENE-131120-131]	4.49e-08	2.42182	1.79142	4.60759	2.86485
AC024175.10	ENSDARG00000081443	No description	4.76e-08	0.741523	0.717877	11.1123	10.2998
ppdpfa	ENSDARG00000007682	pancreatic progenitor cell differentiation and proliferation factor a [Source:ZFIN;Acc:ZDB-GENE- 030219-204]	4.8e-08	1.34563	1.21384	6.39407	4.99318
map1lc3b	ENSDARG00000101127	microtubule-associated protein 1 light chain 3 beta [Source:ZFIN;Acc:ZDB-GENE-030131-1145]	5.36e-08	1.16184	1.07438	6.79129	5.54852
opn4xb	ENSDARG00000103259	opsin 4xb [Source:ZFIN;Acc:ZDB-GENE-070705- 526]	5.4e-08	2.2712	1.72965	5.18813	2.79077
cep55l	ENSDARG00000102349	centrosomal protein 55 like [Source:ZFIN;Acc:ZDB-GENE-050522-222]	5.57e-08	0.789211	0.760579	10.1393	9.46637
crygm2d8	ENSDARG00000069817	crystallin, gamma M2d8 [Source:ZFIN;Acc:ZDB- GENE-040718-321]	6.8e-08	0.851901	0.815743	10.1503	9.22951
triobpa	ENSDARG00000075870	TRIO and F-actin binding protein a [Source:ZFIN;Acc:ZDB-GENE-110411-40]	7.09e-08	1.78411	1.4928	5.34839	3.48905
gnb3b	ENSDARG00000002696	guanine nucleotide binding protein (G protein), beta polypeptide 3b [Source:ZFIN;Acc:ZDB-GENE- 040426-2280]	8.28e-08	0.805727	0.774667	9.64817	8.77719
pdcd4b	ENSDARG00000041022	programmed cell death 4b [Source:ZFIN;Acc:ZDB-GENE-030131-9847]	8.52e-08	1.22549	1.12129	6.61845	5.32345
ankrd6a	ENSDARG00000057790	ankyrin repeat domain 6a [Source:ZFIN;Acc:ZDB-GENE-120525-1]	9.21e-08	1.78137	1.48766	5.37176	3.53058
gc3	ENSDARG00000026820	guanylyl cyclase 3 [Source:ZFIN;Acc:ZDB-GENE- 011128-9]	9.21e-08	1.05639	0.987874	7.63439	6.51249
tnnt3a	ENSDARG00000030270	troponin T type 3a (skeletal, fast) [Source:ZFIN;Acc:ZDB-GENE-000322-3]	9.72e-08	0.995996	0.937981	8.41302	7.35288
si:dkey-188p4.1	ENSDARG00000088638	si:dkey-188p4.1 [Source:ZFIN;Acc:ZDB-GENE- 050208-496]	1e-07	2.79173	1.87047	4.41857	1.41013
sh2d4bb	ENSDARG00000015144	SH2 domain containing 4Bb [Source:ZFIN;Acc:ZDB-GENE-130531-42]	1.15e-07	3.76702	1.98089	3.54815	0.0881985
espnla	ENSDARG00000078211	espin-like a [Source:ZFIN;Acc:ZDB-GENE- 131121-3]	1.24e-07	3.06346	1.90738	4.19185	1.1043
nefla	ENSDARG00000057568	neurofilament, light polypeptide a [Source:ZFIN;Acc:ZDB-GENE-091117-1]	1.24e-07	1.86771	1.5293	5.82775	3.91372
si:ch211-207j7.2	ENSDARG00000090793	si:ch211-207j7.2 [Source:ZFIN;Acc:ZDB-GENE- 120215-232]	1.24e-07	1.62528	1.3925	5.58374	3.89983
GRAMD2	ENSDARG00000103736	GRAM domain containing 2 [Source:HGNC Symbol;Acc:HGNC:27287]	1.27e-07	2.12645	1.6516	4.9557	2.83413
neurod4	ENSDARG00000003469	neuronal differentiation 4 [Source:ZFIN;Acc:ZDB-GENE-030730-1]	1.29e-07	1.31798	1.18722	6.41715	5.0196
rpl26	ENSDARG00000102317	ribosomal protein L26 [Source:ZFIN;Acc:ZDB- GENE-040426-2117]	1.35e-07	0.855737	0.817689	10.1598	9.23661
cdk5r2b	ENSDARG00000078671	cyclin-dependent kinase 5, regulatory subunit 2b (p39) [Source:ZFIN;Acc:ZDB-GENE-040801-251]	1.43e-07	1.83772	1.51163	5.3207	3.38313
AC024175.12	ENSDARG00000081758	No description	1.44e-07	0.759151	0.732226	9.6637	8.82919
atp2b1b	ENSDARG00000007788	ATPase, Ca++ transporting, plasma membrane 1b [Source:ZFIN;Acc:ZDB-GENE-080409-1]	1.48e-07	1.12019	1.03701	7.45883	6.28194
cd9a	ENSDARG00000005842	CD9 molecule a [Source:ZFIN;Acc:ZDB-GENE- 030131-1175]	1.5e-07	1.54777	1.34193	5.73564	4.1104
AC024175.1	ENSDARG00000080128	No description	1.53e-07	1.68864	1.42753	10.5203	9.40127
nefma	ENSDARG00000021351	neurofilament, medium polypeptide a [Source:ZFIN;Acc:ZDB-GENE-050522-205]	1.62e-07	1.18232	1.08483	7.21985	5.97747
mcf2a	ENSDARG00000022895	MCF.2 cell line derived transforming sequence a [Source:ZFIN;Acc:ZDB-GENE-030616-52]	1.64e-07	1.95364	1.56734	5.77037	3.73244
itm2cb	ENSDARG00000039650	integral membrane protein 2Cb [Source:ZFIN;Acc:ZDB-GENE-030131-7806]	1.65e-07	1.74432	1.45837	5.31565	3.50165
nsfa	ENSDARG00000007654	N-ethylmaleimide-sensitive factor a [Source:ZFIN;Acc:ZDB-GENE-030616-37]	1.76e-07	1.19154	1.09143	6.66435	5.39851
cplx4a	ENSDARG00000059978	complexin 4a [Source:ZFIN;Acc:ZDB-GENE- 060526-116]	1.81e-07	1.22148	1.11391	6.76481	5.46313
prnpa	ENSDARG00000026229	prion protein a [Source:ZFIN;Acc:ZDB-GENE- 041217-6]	1.86e-07	1.87287	1.52541	5.16566	3.19926
fstl5	ENSDARG00000040198	follistatin-like 5 [Source:ZFIN;Acc:ZDB-GENE- 070127-1]	2.15e-07	0.916387	0.868687	7.77539	6.78438
si:ch211-195j11.30	ENSDARG00000102834	si:ch211-195j11.30 [Source:ZFIN;Acc:ZDB-GENE- 141216-465]	2.18e-07	4.80272	1.9846	3.19295	-1.8358
AC024175.17	ENSDARG00000082753	No description	2.38e-07	0.714567	0.691333	11.4966	10.7082
dnah9l	ENSDARG00000062630	dynein, axonemal, heavy polypeptide 9 like [Source:ZFIN;Acc:ZDB-GENE-050506-1]	2.48e-07	1.51083	1.31287	6.23292	4.70728
ucp2	ENSDARG00000043154	uncoupling protein 2 [Source:ZFIN;Acc:ZDB- GENE-990708-8]	2.55e-07	1.05031	0.978916	7.10423	5.97025
crygm2d19	ENSDARG00000076693	crystallin, gamma M2d19 [Source:ZFIN;Acc:ZDB- GENE-081105-90]	2.61e-07	0.886095	0.842322	8.3598	7.40036
opn4.1	ENSDARG00000007553	opsin 4.1 [Source:ZFIN;Acc:ZDB-GENE-030314- 2]	2.69e-07	2.09077	1.61959	4.74955	2.60031
ISCU (2 of 2)	ENSDARG00000035596	iron-sulfur cluster assembly enzyme [Source:HGNC Symbol;Acc:HGNC:29882]	2.82e-07	1.54302	1.33198	5.60403	3.98206
si:dkey-231l1.12	ENSDARG00000096277	si:dkey-231l1.12 [Source:ZFIN;Acc:ZDB-GENE- 120215-79]	3.1e-07	1.13996	1.04881	6.64704	5.43828
rbm24a	ENSDARG00000102995	RNA binding motif protein 24a [Source:ZFIN;Acc:ZDB-GENE-040628-1]	3.27e-07	1.30451	1.17076	7.0962	5.73457
skp1	ENSDARG00000003151	S-phase kinase-associated protein 1 [Source:ZFIN;Acc:ZDB-GENE-040426-1707]	3.38e-07	0.816388	0.781382	8.35831	7.46849
slc17a8	ENSDARG00000057728	solute carrier family 17 (vesicular glutamate transporter), member 8 [Source:ZFIN;Acc:ZDB-GENE- 060503-416]	3.39e-07	2.47652	1.74606	5.18375	2.62214
crygm2d9	ENSDARG00000073750	crystallin, gamma M2d9 [Source:ZFIN;Acc:ZDB- GENE-081105-81]	3.42e-07	1.17461	1.07482	6.52891	5.28459
eef1a1b	ENSDARG00000069951	eukaryotic translation elongation factor 1 alpha 1b [Source:ZFIN;Acc:ZDB-GENE-050417-327]	3.45e-07	1.77013	1.46134	5.12304	3.29041
stx3a	ENSDARG00000001880	syntaxin 3A [Source:ZFIN;Acc:ZDB-GENE-040426- 1489]	3.79e-07	1.22414	1.11135	6.46922	5.20297
zgc:112320	ENSDARG00000056791	zgc:112320 [Source:ZFIN;Acc:ZDB-GENE-050522- 144]	3.82e-07	3.69045	1.90714	3.48078	-0.267048
slc17a7a	ENSDARG00000016480	solute carrier family 17 (vesicular glutamate transporter), member 7a [Source:ZFIN;Acc:ZDB- GENE-050105-5]	4.33e-07	1.5001	1.30018	6.10096	4.55987
frmpd1a	ENSDARG00000079074	FERM and PDZ domain containing 1a [Source:ZFIN;Acc:ZDB-GENE-090313-137]	4.42e-07	1.19222	1.0866	6.59809	5.34401
zgc:77880	ENSDARG00000030563	zgc:77880 [Source:ZFIN;Acc:ZDB-GENE-040426- 1901]	4.67e-07	1.73679	1.43868	5.19765	3.38256
si:ch211-196l7.4	ENSDARG00000095451	si:ch211-196l7.4 [Source:ZFIN;Acc:ZDB-GENE- 050419-122]	4.87e-07	1.43996	1.2601	5.9447	4.44853
gnb5b	ENSDARG00000055377	guanine nucleotide binding protein (G protein), beta 5b [Source:ZFIN;Acc:ZDB-GENE-040426-1712]	4.89e-07	1.40976	1.24009	5.93695	4.4512
ucp3	ENSDARG00000091209	uncoupling protein 3 [Source:ZFIN;Acc:ZDB- GENE-040426-1317]	5.11e-07	1.00981	0.943424	7.18525	6.09916
RGS9BP	ENSDARG00000086756	regulator of G protein signaling 9 binding protein [Source:HGNC Symbol;Acc:HGNC:30304]	5.22e-07	1.28047	1.15013	6.12391	4.77251
mt-nd4l	ENSDARG00000063916	NADH dehydrogenase 4L, mitochondrial [Source:ZFIN;Acc:ZDB-GENE-011205-11]	5.22e-07	1.15033	1.05391	8.17054	7.03062
wu:fb18f06	ENSDARG00000097635	wu:fb18f06 [Source:ZFIN;Acc:ZDB-GENE-030131- 261]	5.43e-07	1.47937	1.28439	6.08006	4.54819
foxg1b	ENSDARG00000032705	forkhead box G1b [Source:ZFIN;Acc:ZDB-GENE- 040426-2437]	5.54e-07	1.40009	1.23243	5.98465	4.52338
SEPT4 (2 of 2)	ENSDARG00000105271	septin 4 [Source:HGNC Symbol;Acc:HGNC:9165]	5.63e-07	1.3719	1.21322	6.51032	5.06534
rpgrip1	ENSDARG00000076055	retinitis pigmentosa GTPase regulator interacting protein 1 [Source:ZFIN;Acc:ZDB-GENE-091204- 394]	5.74e-07	1.37818	1.2173	5.92237	4.4776
crybb1l2	ENSDARG00000016793	crystallin, beta B1, like 2 [Source:ZFIN;Acc:ZDB-GENE-070822-18]	5.87e-07	0.946868	0.891213	7.6254	6.60073
GP1BA	ENSDARG00000088833	glycoprotein Ib (platelet), alpha polypeptide [Source:HGNC Symbol;Acc:HGNC:4439]	6.04e-07	3.35544	1.8693	3.56015	0.145937
dre-mir-124-3	ENSDARG00000081423	dre-mir-124-3 [Source:miRBase;Acc:MI0001968]	6.1e-07	3.24884	1.86135	3.62962	0.276683
slc7a6os	ENSDARG00000010596	solute carrier family 7, member 6 opposite strand [Source:ZFIN;Acc:ZDB-GENE-041114-32]	6.13e-07	1.27905	1.14783	6.3057	4.95076
mpc1	ENSDARG00000093448	mitochondrial pyruvate carrier 1 [Source:ZFIN;Acc:ZDB-GENE-040718-94]	6.27e-07	1.44281	1.25931	5.74328	4.24115
ponzr6	ENSDARG00000036382	plac8 onzin related protein 6 [Source:ZFIN;Acc:ZDB-GENE-081104-326]	6.63e-07	3.39999	1.86563	3.5381	0.0881985
uqcrb	ENSDARG00000011146	ubiquinol-cytochrome c reductase binding protein [Source:ZFIN;Acc:ZDB-GENE-050522-542]	6.9e-07	1.14385	1.04739	6.57443	5.36316
pdzd7a	ENSDARG00000076974	PDZ domain containing 7a [Source:ZFIN;Acc:ZDB-GENE-090313-191]	6.96e-07	2.25008	1.65643	4.51131	2.21216
rbp4l	ENSDARG00000044684	retinol binding protein 4, like [Source:ZFIN;Acc:ZDB-GENE-030131-7591]	7.11e-07	1.42731	1.24786	5.81306	4.30816
sf3b6	ENSDARG00000009753	splicing factor 3b, subunit 6 [Source:ZFIN;Acc:ZDB-GENE-040625-36]	7.31e-07	1.13219	1.03813	6.46306	5.25645
SNORD59	ENSDARG00000081030	Small nucleolar RNA SNORD59 [Source:RFAM;Acc:RF00273]	7.71e-07	0.804968	0.769603	8.41703	7.54033
lhfpl5b	ENSDARG00000056458	lipoma HMGIC fusion partner-like 5b [Source:ZFIN;Acc:ZDB-GENE-080220-51]	7.85e-07	4.52154	1.84223	3.21288	-0.800605
wdr95	ENSDARG00000054572	WD40 repeat domain 95 [Source:ZFIN;Acc:ZDB- GENE-131127-243]	7.85e-07	2.43481	1.7094	4.36495	1.94532
aipl1	ENSDARG00000075067	aryl hydrocarbon receptor interacting protein-like 1 [Source:ZFIN;Acc:ZDB-GENE-131121-577]	7.85e-07	2.35343	1.68596	4.36125	1.91532
ATP6AP1L (1 of 2)	ENSDARG00000090963	ATPase, H+ transporting, lysosomal accessory protein 1-like [Source:HGNC Symbol;Acc:HGNC:28091]	8.34e-07	1.55792	1.32784	5.61707	3.87851
tfg	ENSDARG00000003641	trk-fused gene [Source:ZFIN;Acc:ZDB-GENE- 030131-8410]	8.34e-07	1.32125	1.1749	5.91851	4.50701
rps5	ENSDARG00000043453	ribosomal protein S5 [Source:ZFIN;Acc:ZDB- GENE-020419-12]	8.53e-07	0.876501	0.830895	9.08853	8.1348
myo7aa	ENSDARG00000099871	myosin VIIAa [Source:ZFIN;Acc:ZDB-GENE- 020709-1]	8.63e-07	1.09882	1.01146	6.86373	5.69895
uqcrh	ENSDARG00000059128	ubiquinol-cytochrome c reductase hinge protein [Source:ZFIN;Acc:ZDB-GENE-051030-93]	9.01e-07	1.32285	1.17531	5.94417	4.52835
crygm2d1	ENSDARG00000087324	crystallin, gamma M2d1 [Source:ZFIN;Acc:ZDB- GENE-050522-395]	9.53e-07	0.814597	0.777463	9.98851	9.10617
mt-nd1	ENSDARG00000063895	NADH dehydrogenase 1, mitochondrial [Source:ZFIN;Acc:ZDB-GENE-011205-7]	1.02e-06	0.706881	0.682233	11.9708	11.1807
AC024175.3	ENSDARG00000080329	No description	1.08e-06	1.15943	1.05632	7.90063	6.73084
fah	ENSDARG00000101762	fumarylacetoacetate hydrolase (fumarylacetoacetase) [Source:ZFIN;Acc:ZDB-GENE-030131- 1091]	1.09e-06	1.42375	1.24088	6.01931	4.52089
camk1ga	ENSDARG00000044526	calcium/calmodulin-dependent protein kinase IGa [Source:ZFIN;Acc:ZDB-GENE-030131-7594]	1.26e-06	1.73783	1.42233	5.32268	3.45131
mknk2b	ENSDARG00000015164	MAP kinase interacting serine/threonine kinase 2b [Source:ZFIN;Acc:ZDB-GENE-030829-2]	1.29e-06	0.779073	0.745827	8.42617	7.57079
si:ch211-225b11.1	ENSDARG00000002405	si:ch211-225b11.1 [Source:ZFIN;Acc:ZDB-GENE- 060531-39]	1.3e-06	1.60501	1.34899	5.7804	4.11184
gng3	ENSDARG00000009553	guanine nucleotide binding protein (G protein), gamma 3 [Source:ZFIN;Acc:ZDB-GENE-010705-1]	1.49e-06	1.26872	1.13338	5.95624	4.63251
tmc2b	ENSDARG00000030311	transmembrane channel-like 2b [Source:ZFIN;Acc:ZDB-GENE-060526-262]	1.65e-06	2.07911	1.56928	4.98362	2.91103
hnrnpm	ENSDARG00000061735	heterogeneous nuclear ribonucleoprotein M [Source:ZFIN;Acc:ZDB-GENE-030131-6898]	1.65e-06	0.910946	0.857793	7.4875	6.55011
TSTD1	ENSDARG00000071567	thiosulfate sulfurtransferase (rhodanese)- like domain containing 1 [Source:HGNC Symbol;Acc:HGNC:35410]	1.72e-06	2.33814	1.65588	4.28081	1.80598
crybb1	ENSDARG00000068507	crystallin, beta B1 [Source:ZFIN;Acc:ZDB- GENE-010813-1]	1.72e-06	1.23484	1.10821	6.65951	5.36573
rps15a	ENSDARG00000010160	ribosomal protein S15a [Source:ZFIN;Acc:ZDB- GENE-030131-8708]	1.96e-06	0.863281	0.817242	7.89922	6.96157
rbp2a	ENSDARG00000070038	retinol binding protein 2a, cellular [Source:ZFIN;Acc:ZDB-GENE-020320-2]	1.98e-06	1.14706	1.0432	6.37045	5.14079
dnajc5b	ENSDARG00000058147	DnaJ (Hsp40) homolog, subfamily C, member 5 beta [Source:ZFIN;Acc:ZDB-GENE-050413-1]	2.02e-06	3.06018	1.78106	3.64239	0.868895
gc2	ENSDARG00000018329	guanylyl cyclase 2 [Source:ZFIN;Acc:ZDB-GENE- 011128-8]	2.05e-06	2.33394	1.6483	4.23852	1.84998
h1fx	ENSDARG00000054058	H1 histone family, member X [Source:ZFIN;Acc:ZDB-GENE-030131-1228]	2.05e-06	1.28336	1.14082	6.05515	4.69294
PLEKHB1	ENSDARG00000063519	pleckstrin homology domain containing, family B (evectins) member 1 [Source:HGNC Symbol;Acc:HGNC:19079]	2.06e-06	2.33556	1.64815	4.28956	1.89186
tnks1bp1	ENSDARG00000068760	tankyrase 1 binding protein 1 [Source:ZFIN;Acc:ZDB-GENE-050208-317]	2.19e-06	1.01376	0.940106	8.35431	7.28465
thoc7	ENSDARG00000015394	THO complex 7 [Source:ZFIN;Acc:ZDB-GENE- 040801-17]	2.63e-06	1.53107	1.29623	5.33943	3.74151
rassf1	ENSDARG00000004840	Ras association (RalGDS/AF-6) domain family 1 [Source:ZFIN;Acc:ZDB-GENE-040912-14]	2.74e-06	1.30596	1.15359	6.39052	5.0013
copz2	ENSDARG00000006786	coatomer protein complex, subunit zeta 2 [Source:ZFIN;Acc:ZDB-GENE-000406-5]	2.74e-06	1.23149	1.10202	6.01525	4.71617
hmgb3a	ENSDARG00000056725	high mobility group box 3a [Source:ZFIN;Acc:ZDB-GENE-050428-1]	2.83e-06	0.764174	0.731043	9.40823	8.58105
tmx3	ENSDARG00000038894	thioredoxin-related transmembrane protein 3 [Source:ZFIN;Acc:ZDB-GENE-050522-396]	2.94e-06	1.63057	1.35051	5.54651	3.94661
snrpf	ENSDARG00000105037	small nuclear ribonucleoprotein polypeptide F [Source:ZFIN;Acc:ZDB-GENE-040930-9]	2.98e-06	1.35502	1.18539	5.67802	4.25412
zgc:158263	ENSDARG00000037267	zgc:158263 [Source:ZFIN;Acc:ZDB-GENE-070112- 2262]	3.05e-06	1.21784	1.09148	6.3387	5.06534
grpel2	ENSDARG00000069421	GrpE-like 2, mitochondrial [Source:ZFIN;Acc:ZDB-GENE-091204-188]	3.06e-06	1.1494	1.04191	6.48534	5.24151
ric8a	ENSDARG00000007247	RIC8 guanine nucleotide exchange factor A [Source:ZFIN;Acc:ZDB-GENE-040927-18]	3.09e-06	1.30031	1.14857	6.00291	4.61463
gabra6a	ENSDARG00000075058	gamma-aminobutyric acid (GABA) A receptor, alpha 6a [Source:ZFIN;Acc:ZDB-GENE-040426-1692]	3.12e-06	1.73793	1.40546	5.19177	3.55937
si:ch73-199k24.2	ENSDARG00000089149	si:ch73-199k24.2 [Source:ZFIN;Acc:ZDB-GENE- 131121-321]	3.19e-06	3.48446	1.77517	3.30571	-0.267048
fam188b2	ENSDARG00000069867	family with sequence similarity 188, member B2 [Source:ZFIN;Acc:ZDB-GENE-140127-1]	3.19e-06	2.99786	1.74319	3.77069	0.817914
si:ch1073-358o18.1	ENSDARG00000082907	si:ch1073-358o18.1 [Source:ZFIN;Acc:ZDB-GENE- 141212-395]	3.3e-06	2.2652	1.61183	4.25752	1.94379
hsd17b12a	ENSDARG00000015709	hydroxysteroid (17-beta) dehydrogenase 12a [Source:ZFIN;Acc:ZDB-GENE-030131-5628]	3.4e-06	1.26515	1.12353	6.03402	4.70511
gnat2	ENSDARG00000042529	guanine nucleotide binding protein (G protein), alpha transducing activity polypeptide 2 [Source:ZFIN;Acc:ZDB-GENE-011128-10]	3.4e-06	0.71385	0.686323	9.67146	8.87775
histh1l	ENSDARG00000035519	histone H1 like [Source:ZFIN;Acc:ZDB-GENE- 050417-145]	3.48e-06	1.08703	0.994371	7.74887	6.56521
gtf2a2	ENSDARG00000053685	general transcription factor IIA, 2 [Source:ZFIN;Acc:ZDB-GENE-050522-513]	3.49e-06	1.87738	1.46817	4.70078	2.75104
SSC5D (2 of 2)	ENSDARG00000045837	scavenger receptor cysteine rich family, 5 domains [Source:HGNC Symbol;Acc:HGNC:26641]	3.61e-06	2.17563	1.58027	4.62529	2.6442
acbd5a	ENSDARG00000034883	acyl-CoA binding domain containing 5a [Source:ZFIN;Acc:ZDB-GENE-050522-268]	3.63e-06	1.18637	1.06745	6.1553	4.90197
si:ch211-13f8.1	ENSDARG00000093342	si:ch211-13f8.1 [Source:ZFIN;Acc:ZDB-GENE- 061207-4]	3.91e-06	1.86203	1.45818	5.67061	3.61312
myo1hb	ENSDARG00000078603	myosin IHb [Source:ZFIN;Acc:ZDB-GENE-070705- 355]	4.2e-06	2.03219	1.52558	4.7487	2.71256
gpr146	ENSDARG00000059610	G protein-coupled receptor 146 [Source:ZFIN;Acc:ZDB-GENE-050823-3]	4.42e-06	1.15295	1.0418	6.22781	4.99174
apoa1b	ENSDARG00000101324	apolipoprotein A-Ib [Source:ZFIN;Acc:ZDB- GENE-050302-172]	4.48e-06	0.731198	0.701088	10.6506	9.83533
cplx4c	ENSDARG00000094889	complexin 4c [Source:ZFIN;Acc:ZDB-GENE- 101018-1]	4.57e-06	1.86374	1.45559	6.22052	5.66726
atp1b1a	ENSDARG00000013144	ATPase, Na+/K+ transporting, beta 1a polypeptide [Source:ZFIN;Acc:ZDB-GENE-001127-3]	4.57e-06	0.895631	0.841324	7.91632	6.94366
gclc	ENSDARG00000013095	glutamate-cysteine ligase, catalytic subunit [Source:ZFIN;Acc:ZDB-GENE-030131-5056]	4.57e-06	0.882847	0.830746	7.51717	6.56122
hsbp1b	ENSDARG00000041921	heat shock factor binding protein 1b [Source:ZFIN;Acc:ZDB-GENE-040426-1721]	4.65e-06	1.147	1.03704	6.32449	5.10682
rgs9a	ENSDARG00000037925	regulator of G-protein signaling 9a [Source:ZFIN;Acc:ZDB-GENE-060929-92]	4.77e-06	1.259	1.11609	6.32885	5.0367
cldnh	ENSDARG00000069503	claudin h [Source:ZFIN;Acc:ZDB-GENE-010328- 8]	5.07e-06	1.30832	1.14881	5.8006	4.45946
sult1st5	ENSDARG00000003475	sulfotransferase family 1, cytosolic sulfotransferase 5 [Source:ZFIN;Acc:ZDB-GENE-050809-2]	5.38e-06	2.89498	1.70935	3.80988	1.01719
kcnb2	ENSDARG00000038862	potassium voltage-gated channel, Shab- related subfamily, member 2 [Source:ZFIN;Acc:ZDB-GENE- 070912-170]	5.68e-06	1.27532	1.1255	5.9478	4.73832
zfand5b	ENSDARG00000002271	zinc finger, AN1-type domain 5b [Source:ZFIN;Acc:ZDB-GENE-040426-875]	5.68e-06	1.09827	0.999623	6.45295	5.27365
hpca	ENSDARG00000018397	hippocalcin [Source:ZFIN;Acc:ZDB-GENE-040426- 1683]	5.76e-06	0.96332	0.895255	6.82528	5.77001
AC024175.19	ENSDARG00000083046	No description	5.8e-06	0.67517	0.650851	11.9144	11.1637
ndufc2	ENSDARG00000102115	NADH dehydrogenase (ubiquinone) 1, subcomplex unknown, 2 [Source:ZFIN;Acc:ZDB-GENE-050320- 87]	5.84e-06	1.13597	1.02722	6.15484	4.95984
ndufb7	ENSDARG00000033789	NADH dehydrogenase (ubiquinone) 1 beta subcomplex, 7 [Source:ZFIN;Acc:ZDB-GENE-040426-1886]	6.06e-06	1.10422	1.00354	6.36085	5.20051
hnrnpabb	ENSDARG00000099865	heterogeneous nuclear ribonucleoprotein A/Bb [Source:ZFIN;Acc:ZDB-GENE-040426-2516]	6.38e-06	0.852497	0.804219	7.98214	7.04807
mylipa	ENSDARG00000008859	myosin regulatory light chain interacting protein a [Source:ZFIN;Acc:ZDB-GENE-030131-7831]	6.4e-06	1.24114	1.10097	5.86841	4.56693
crygm2d10	ENSDARG00000087765	crystallin, gamma M2d10 [Source:ZFIN;Acc:ZDB- GENE-071004-96]	6.57e-06	0.882614	0.829144	7.98707	7.03802
atg3	ENSDARG00000009350	autophagy related 3 [Source:ZFIN;Acc:ZDB- GENE-030131-8576]	6.65e-06	1.02129	0.940032	6.7213	5.62589
hmox1a	ENSDARG00000027529	heme oxygenase 1a [Source:ZFIN;Acc:ZDB-GENE- 030131-3102]	6.88e-06	1.72185	1.3807	5.36514	3.82528
RASGRF2 (2 of 2)	ENSDARG00000075054	Ras protein-specific guanine nucleotide- releasing factor 2 [Source:HGNC Symbol;Acc:HGNC:9876]	6.88e-06	1.48057	1.25229	5.31737	3.7831
abhd4	ENSDARG00000102887	abhydrolase domain containing 4 [Source:ZFIN;Acc:ZDB-GENE-050417-83]	7.21e-06	2.13912	1.54604	4.28321	2.10246
sh2d4ba	ENSDARG00000069374	SH2 domain containing 4Ba [Source:ZFIN;Acc:ZDB-GENE-090313-53]	7.43e-06	2.72653	1.67273	3.7411	1.08317
C17H14orf166	ENSDARG00000009253	chromosome 14 open reading frame 166 [Source:HGNC Symbol;Acc:HGNC:23169]	7.43e-06	1.27478	1.12226	5.73835	4.41275
bach1b	ENSDARG00000002196	BTB and CNC homology 1, basic leucine zipper transcription factor 1 b [Source:ZFIN;Acc:ZDB-GENE-050522- 220]	8.01e-06	1.49788	1.25993	5.3578	3.80412
apoc1l	ENSDARG00000092170	apolipoprotein C-I like [Source:ZFIN;Acc:ZDB- GENE-030131-1074]	8.68e-06	0.828561	0.783083	7.66289	6.77966
PLCB2	ENSDARG00000090381	phospholipase C, beta 2 [Source:HGNC Symbol;Acc:HGNC:9055]	8.72e-06	1.86253	1.43826	5.52896	3.52543
laptm4a	ENSDARG00000006397	lysosomal protein transmembrane 4 alpha [Source:ZFIN;Acc:ZDB-GENE-030131-1024]	8.88e-06	1.07181	0.976671	6.3957	5.24423
zgc:64201	ENSDARG00000101636	zgc:64201 [Source:ZFIN;Acc:ZDB-GENE-040426- 1402]	9.41e-06	1.25833	1.10874	8.38995	8.03092
sst6	ENSDARG00000093804	somatostatin 6 [Source:ZFIN;Acc:ZDB-GENE- 081022-199]	9.51e-06	5.75508	1.67988	2.79639	-2.78028
STRC	ENSDARG00000079336	stereocilin [Source:HGNC Symbol;Acc:HGNC:16035]	9.8e-06	1.61967	1.32255	5.26527	3.61486
AC024175.6	ENSDARG00000080630	No description	9.91e-06	1.89049	1.44625	8.71348	7.35876
usp2a	ENSDARG00000097996	No description	9.99e-06	0.89248	0.835499	7.04284	6.07074
faimb	ENSDARG00000020814	Fas apoptotic inhibitory molecule b [Source:ZFIN;Acc:ZDB-GENE-040718-91]	1.01e-05	1.91483	1.45509	5.02062	3.04164
lrit3a	ENSDARG00000055463	info leucine-rich repeat, immunoglobulin- like and transmembrane domains 3a [Source:ZFIN;Acc:ZDB- GENE-080723-63]	1.08e-05	1.90436	1.44994	4.51371	2.53662
CD37	ENSDARG00000075515	CD37 molecule [Source:HGNC Symbol;Acc:HGNC:1666]	1.09e-05	3.45597	1.67556	3.3359	-0.0930866
kcnj1a.4	ENSDARG00000090635	potassium inwardly-rectifying channel, subfamily J, member 1a, tandem duplicate 4 [Source:ZFIN;Acc:ZDB-GENE-050420-186]	1.1e-05	2.90753	1.67021	3.56141	0.549615
ppib	ENSDARG00000092798	peptidylprolyl isomerase B (cyclophilin B) [Source:ZFIN;Acc:ZDB-GENE-040426-1955]	1.15e-05	0.978633	0.903712	7.19816	6.15299
pde6g	ENSDARG00000101984	phosphodiesterase 6G, cGMP-specific, rod, gamma [Source:ZFIN;Acc:ZDB-GENE-030904-1]	1.19e-05	1.87743	1.43649	4.61759	2.65284
si:ch211-113e8.6	ENSDARG00000102497	si:ch211-113e8.6 [Source:ZFIN;Acc:ZDB-GENE- 090313-13]	1.2e-05	4.51717	1.63644	2.88573	-2.20428
si:dkey-229d2.7	ENSDARG00000092460	si:dkey-229d2.7 [Source:ZFIN;Acc:ZDB-GENE- 060526-265]	1.26e-05	3.94481	1.66133	2.97205	-0.996764
dmbx1a	ENSDARG00000009922	diencephalon/mesencephalon homeobox 1a [Source:ZFIN;Acc:ZDB-GENE-020117-1]	1.29e-05	1.74847	1.37895	5.40378	3.67795
zgc:172271	ENSDARG00000013240	zgc:172271 [Source:ZFIN;Acc:ZDB-GENE-080204- 110]	1.3e-05	0.953953	0.883632	7.51098	6.67939
STYK1 (2 of 2)	ENSDARG00000070950	serine/threonine/tyrosine kinase 1 [Source:HGNC Symbol;Acc:HGNC:18889]	1.32e-05	1.89824	1.44182	4.74149	2.73958
alas1	ENSDARG00000021059	aminolevulinate, delta-, synthase 1 [Source:ZFIN;Acc:ZDB-GENE-001229-2]	1.33e-05	0.846535	0.796525	8.13025	7.21018
hsp70.1	ENSDARG00000029688	heat shock cognate 70-kd protein, tandem duplicate 1 [Source:ZFIN;Acc:ZDB-GENE-990415-91]	1.38e-05	3.30119	1.6533	3.51006	0.0308772
adcyap1b	ENSDARG00000027740	adenylate cyclase activating polypeptide 1b [Source:ZFIN;Acc:ZDB-GENE-041010-89]	1.4e-05	1.05646	0.961963	6.31049	5.20849
ppp1r15a	ENSDARG00000069135	protein phosphatase 1, regulatory subunit 15A [Source:ZFIN;Acc:ZDB-GENE-030131-4408]	1.42e-05	1.30915	1.13732	5.70982	4.32073
lrit1b	ENSDARG00000099406	leucine-rich repeat, immunoglobulin-like and transmembrane domains 1b [Source:ZFIN;Acc:ZDB-GENE-060616- 45]	1.5e-05	1.74602	1.37416	4.97517	3.2078
neurod1	ENSDARG00000019566	neuronal differentiation 1 [Source:ZFIN;Acc:ZDB-GENE-990415-172]	1.51e-05	0.83433	0.785895	7.43777	6.52587
bcl2l10	ENSDARG00000026766	BCL2-like 10 (apoptosis facilitator) [Source:ZFIN;Acc:ZDB-GENE-030825-2]	1.53e-05	1.38886	1.1858	5.6912	4.27087
CNGA1 (2 of 2)	ENSDARG00000029898	cyclic nucleotide gated channel alpha 1 [Source:HGNC Symbol;Acc:HGNC:2148]	1.57e-05	1.8021	1.39739	4.74748	2.87817
h3f3a	ENSDARG00000020504	H3 histone, family 3A [Source:ZFIN;Acc:ZDB- GENE-040426-1928]	1.57e-05	0.807212	0.763044	7.42598	6.55227
rorab	ENSDARG00000001910	RAR-related orphan receptor A, paralog b [Source:ZFIN;Acc:ZDB-GENE-040426-855]	1.58e-05	0.862327	0.80883	7.33034	6.40484
stmn2a	ENSDARG00000033234	stathmin 2a [Source:ZFIN;Acc:ZDB-GENE-041010- 85]	1.58e-05	0.81117	0.766333	7.40716	6.51793
psap	ENSDARG00000013968	prosaposin [Source:ZFIN;Acc:ZDB-GENE-020108- 1]	1.62e-05	0.812554	0.767402	7.91053	7.03602
hmgb1a	ENSDARG00000099175	high mobility group box 1a [Source:ZFIN;Acc:ZDB-GENE-030131-341]	1.64e-05	0.646613	0.623358	9.30232	8.58191
si:ch211-194i10.5	ENSDARG00000037867	si:ch211-194i10.5 [Source:ZFIN;Acc:ZDB-GENE- 131120-154]	1.66e-05	1.21809	1.07553	5.77072	4.46529
POLD4	ENSDARG00000079632	polymerase (DNA-directed), delta 4, accessory subunit [Source:HGNC Symbol;Acc:HGNC:14106]	1.67e-05	1.55652	1.2791	5.32099	3.73707
nsrp1	ENSDARG00000015221	nuclear speckle splicing regulatory protein 1 [Source:ZFIN;Acc:ZDB-GENE-030131-2646]	1.72e-05	1.34198	1.15538	6.0823	4.71216
ube2d1b	ENSDARG00000038576	ubiquitin-conjugating enzyme E2D 1b [Source:ZFIN;Acc:ZDB-GENE-030131-2735]	1.73e-05	1.15694	1.03294	6.13791	4.92109
eml2	ENSDARG00000008808	echinoderm microtubule associated protein like 2 [Source:ZFIN;Acc:ZDB-GENE-050706-71]	1.77e-05	1.24711	1.09421	6.00004	4.667
tpd52l2a	ENSDARG00000027154	tumor protein D52-like 2a [Source:ZFIN;Acc:ZDB-GENE-030131-7047]	1.78e-05	0.981054	0.902946	6.8609	5.87039
rab14	ENSDARG00000074246	RAB14, member RAS oncogene family [Source:ZFIN;Acc:ZDB-GENE-030826-20]	1.8e-05	0.873172	0.817112	7.15836	6.21802
prdm1a	ENSDARG00000002445	PR domain containing 1a, with ZNF domain [Source:ZFIN;Acc:ZDB-GENE-030131-2193]	1.84e-05	1.50817	1.2512	5.72388	4.19125
camk2n1a	ENSDARG00000025855	calcium/calmodulin-dependent protein kinase II inhibitor 1a [Source:ZFIN;Acc:ZDB-GENE-050522-319]	1.84e-05	0.96863	0.893103	6.60055	5.55266
GRXCR2	ENSDARG00000053692	glutaredoxin, cysteine rich 2 [Source:HGNC Symbol;Acc:HGNC:33862]	1.88e-05	3.70511	1.60376	3.24223	-0.593087
pdap1a	ENSDARG00000092546	pdgfa associated protein 1a [Source:ZFIN;Acc:ZDB-GENE-030131-1693]	1.89e-05	0.953962	0.881459	7.31258	6.26358
si:dkey-11p23.12	ENSDARG00000096021	si:dkey-11p23.12 [Source:ZFIN;Acc:ZDB-GENE- 110914-247]	1.91e-05	4.47081	1.5928	2.83736	-2.20428
AC024175.4	ENSDARG00000080337	No description	1.91e-05	0.615808	0.595391	12.9781	12.289
cd2bp2	ENSDARG00000027357	CD2 (cytoplasmic tail) binding protein 2 [Source:ZFIN;Acc:ZDB-GENE-040426-925]	2e-05	1.17732	1.04568	6.06673	4.81689
si:ch211-202a12.4	ENSDARG00000002369	si:ch211-202a12.4 [Source:ZFIN;Acc:ZDB-GENE- 030131-8486]	2e-05	0.875721	0.818707	8.25546	7.30502
rpl28	ENSDARG00000005791	ribosomal protein L28 [Source:ZFIN;Acc:ZDB- GENE-040930-10]	2e-05	0.834083	0.784517	7.55578	6.6436
cyp2aa9	ENSDARG00000098890	cytochrome P450, family 2, subfamily AA, polypeptide 9 [Source:ZFIN;Acc:ZDB-GENE-080724-3]	2.03e-05	1.24064	1.08824	5.66796	4.3976
tnnt2d	ENSDARG00000002988	troponin T2d, cardiac [Source:ZFIN;Acc:ZDB- GENE-050626-97]	2.06e-05	0.907203	0.843941	7.75438	6.77003
sall1a	ENSDARG00000074319	spalt-like transcription factor 1a [Source:ZFIN;Acc:ZDB-GENE-020228-2]	2.1e-05	1.06648	0.966175	6.6474	5.50151
zgc:55512	ENSDARG00000003017	zgc:55512 [Source:ZFIN;Acc:ZDB-GENE-030131- 4195]	2.22e-05	1.61509	1.30297	5.08013	3.40832
grik1a	ENSDARG00000069139	glutamate receptor, ionotropic, kainate 1a [Source:ZFIN;Acc:ZDB-GENE-030131-6502]	2.23e-05	1.64443	1.31719	4.86097	3.31226
mfap1	ENSDARG00000018241	microfibrillar-associated protein 1 [Source:ZFIN;Acc:ZDB-GENE-040426-1075]	2.33e-05	1.03128	0.939288	7.13671	6.06423
igfbp7	ENSDARG00000104138	insulin-like growth factor binding protein 7 [Source:ZFIN;Acc:ZDB-GENE-040426-2423]	2.33e-05	0.664943	0.638936	10.5588	10.0013
pvalb9	ENSDARG00000071601	parvalbumin 9 [Source:ZFIN;Acc:ZDB-GENE- 030805-4]	2.46e-05	1.94238	1.43802	4.60141	2.58569
chrna9	ENSDARG00000054680	cholinergic receptor, nicotinic, alpha 9 [Source:ZFIN;Acc:ZDB-GENE-090312-63]	2.58e-05	3.00831	1.61466	3.50247	0.530877
C20H2orf71 (2 of 2)	ENSDARG00000102288	chromosome 2 open reading frame 71 [Source:HGNC Symbol;Acc:HGNC:34383]	2.59e-05	1.74224	1.358	4.792	2.99331
cnbpb	ENSDARG00000070922	CCHC-type zinc finger, nucleic acid binding protein b [Source:ZFIN;Acc:ZDB-GENE-030131-7782]	2.61e-05	0.749025	0.711877	8.03666	7.22048
elovl4b	ENSDARG00000027495	ELOVL fatty acid elongase 4b [Source:ZFIN;Acc:ZDB-GENE-030131-7672]	2.66e-05	1.14269	1.01872	6.04571	4.86285
gclm	ENSDARG00000018953	glutamate-cysteine ligase, modifier subunit [Source:ZFIN;Acc:ZDB-GENE-030131-5906]	2.67e-05	1.91599	1.42544	4.76184	2.78053
opn1lw1	ENSDARG00000044862	opsin 1 (cone pigments), long-wave- sensitive, 1 [Source:ZFIN;Acc:ZDB-GENE-990604-41]	2.71e-05	2.35665	1.54498	4.20481	1.85389
eif2s2	ENSDARG00000053047	eukaryotic translation initiation factor 2, subunit 2 beta [Source:ZFIN;Acc:ZDB-GENE-030131-3085]	2.76e-05	0.759708	0.720818	8.10285	7.27144
AC024175.23	ENSDARG00000083480	No description	2.76e-05	0.68641	0.657457	10.0102	9.24822
glulb	ENSDARG00000100003	glutamate-ammonia ligase (glutamine synthase) b [Source:ZFIN;Acc:ZDB-GENE-030131-8417]	2.8e-05	0.801465	0.756008	7.33455	6.45968
tmsb	ENSDARG00000054911	thymosin, beta [Source:ZFIN;Acc:ZDB-GENE- 050307-5]	2.82e-05	1.69056	1.33256	5.05359	3.33613
RBP1 (2 of 2)	ENSDARG00000038742	retinol binding protein 1, cellular [Source:HGNC Symbol;Acc:HGNC:9919]	2.85e-05	1.93555	1.43094	4.33112	2.32064
rsph10b	ENSDARG00000051891	radial spoke head 10 homolog B (Chlamydomonas) [Source:ZFIN;Acc:ZDB-GENE-060929-300]	2.86e-05	3.01513	1.60794	3.51706	1.00464
sepw2b	ENSDARG00000089936	selenoprotein W, 2b [Source:ZFIN;Acc:ZDB- GENE-030428-2]	2.86e-05	1.65706	1.31704	4.90491	3.16476
fbp1a	ENSDARG00000021366	fructose-1,6-bisphosphatase 1a [Source:ZFIN;Acc:ZDB-GENE-030131-7171]	2.89e-05	0.949931	0.875685	9.01939	8.66383
inaa	ENSDARG00000011862	internexin neuronal intermediate filament protein, alpha a [Source:ZFIN;Acc:ZDB-GENE-060531-65]	2.98e-05	1.1757	1.04022	5.76945	4.52474
ucp1	ENSDARG00000023151	uncoupling protein 1 [Source:ZFIN;Acc:ZDB- GENE-010503-1]	3.12e-05	0.881868	0.82144	7.32658	6.35618
slc12a7b	ENSDARG00000062058	solute carrier family 12 (potassium/chloride transporter), member 7b [Source:ZFIN;Acc:ZDB-GENE-030829- 61]	3.12e-05	0.852754	0.797872	7.729	6.80391
dnajb1b	ENSDARG00000041394	DnaJ (Hsp40) homolog, subfamily B, member 1b [Source:ZFIN;Acc:ZDB-GENE-030131-5455]	3.14e-05	1.4103	1.18666	5.18248	3.69778
pnn	ENSDARG00000015851	pinin, desmosome associated protein [Source:ZFIN;Acc:ZDB-GENE-060519-3]	3.14e-05	1.10752	0.992233	7.84566	6.69018
APOLD1 (4 of 4)	ENSDARG00000089961	apolipoprotein L domain containing 1 [Source:HGNC Symbol;Acc:HGNC:25268]	3.29e-05	2.35883	1.53592	4.06784	1.57301
atpif1a	ENSDARG00000067975	ATPase inhibitory factor 1a [Source:ZFIN;Acc:ZDB-GENE-070410-36]	3.33e-05	0.893551	0.830453	6.8489	5.86582
kcnj1a.3	ENSDARG00000086248	potassium inwardly-rectifying channel, subfamily J, member 1a, tandem duplicate 3 [Source:ZFIN;Acc:ZDB-GENE-050420-256]	3.37e-05	2.53782	1.5639	3.79358	1.19401
nfs1	ENSDARG00000062237	NFS1 cysteine desulfurase [Source:ZFIN;Acc:ZDB-GENE-060405-1]	3.4e-05	1.17059	1.03528	5.77066	4.53689
acy3.2	ENSDARG00000005525	aspartoacylase (aminocyclase) 3, tandem duplicate 2 [Source:ZFIN;Acc:ZDB-GENE-040718-37]	3.45e-05	1.10984	0.993041	6.13365	4.95509
shfm1	ENSDARG00000027899	split hand/foot malformation (ectrodactyly) type 1 [Source:ZFIN;Acc:ZDB-GENE-030131-988]	3.46e-05	1.12219	1.00172	6.0702	4.87549
espnlb	ENSDARG00000093112	espin-like b [Source:ZFIN;Acc:ZDB-GENE- 070912-481]	3.55e-05	2.42451	1.54457	3.87488	1.43378
smndc1	ENSDARG00000056235	survival motor neuron domain containing 1 [Source:ZFIN;Acc:ZDB-GENE-030131-614]	3.59e-05	0.948673	0.87332	6.51523	5.48336
nampta	ENSDARG00000030598	nicotinamide phosphoribosyltransferase a [Source:ZFIN;Acc:ZDB-GENE-110420-1]	3.59e-05	0.757912	0.718356	7.66711	6.80566
slc7a9	ENSDARG00000005894	solute carrier family 7 (amino acid transporter light chain, bo,+ system), member 9 [Source:ZFIN;Acc:ZDB-GENE-080116-2]	3.88e-05	0.707403	0.674795	9.10388	8.55124
usp21	ENSDARG00000094280	ubiquitin specific peptidase 21 [Source:ZFIN;Acc:ZDB-GENE-100210-3]	4e-05	2.32457	1.52073	3.92213	1.53088
nucb2a	ENSDARG00000036299	nucleobindin 2a [Source:ZFIN;Acc:ZDB-GENE- 030826-14]	4.09e-05	0.808851	0.760573	7.88589	6.98621
PDE5A (2 of 2)	ENSDARG00000056806	phosphodiesterase 5A, cGMP-specific [Source:HGNC Symbol;Acc:HGNC:8784]	4.3e-05	1.91242	1.40808	4.45674	2.48052
pde6g	ENSDARG00000101984	phosphodiesterase 6G, cGMP-specific, rod, gamma [Source:ZFIN;Acc:ZDB-GENE-030904-1]	4.32e-05	1.68358	1.31845	4.70562	2.92156
AMIGO3 (2 of 2)	ENSDARG00000079569	adhesion molecule with Ig-like domain 3 [Source:HGNC Symbol;Acc:HGNC:24075]	4.46e-05	3.20744	1.58025	3.14887	-0.11932
abhd2b	ENSDARG00000045804	abhydrolase domain containing 2b [Source:ZFIN;Acc:ZDB-GENE-061027-74]	4.51e-05	1.88009	1.39515	4.48796	2.54664
zgc:194551	ENSDARG00000077903	zgc:194551 [Source:ZFIN;Acc:ZDB-GENE-030131- 4878]	4.58e-05	2.74336	1.56697	3.46985	0.712162
ip6k2a	ENSDARG00000008310	inositol hexakisphosphate kinase 2a [Source:ZFIN;Acc:ZDB-GENE-030131-760]	4.61e-05	0.821715	0.770671	7.40323	6.49152
atp5ia	ENSDARG00000078113	ATP synthase, H+ transporting, mitochondrial Fo complex, subunit Ea [Source:ZFIN;Acc:ZDB-GENE-070928- 12]	4.78e-05	1.33235	1.13408	5.30987	3.89125
slc3a2b	ENSDARG00000037012	solute carrier family 3 (amino acid transporter heavy chain), member 2b [Source:ZFIN;Acc:ZDB- GENE-040122-2]	4.78e-05	0.907777	0.839661	6.74892	5.76471
hnrnpd	ENSDARG00000059246	heterogeneous nuclear ribonucleoprotein D [Source:ZFIN;Acc:ZDB-GENE-070424-97]	5.2e-05	0.794875	0.747985	7.22133	6.37206
mmp13a	ENSDARG00000012395	matrix metallopeptidase 13a [Source:ZFIN;Acc:ZDB-GENE-031202-2]	5.37e-05	2.45356	1.52776	3.66978	1.14709
rwdd1	ENSDARG00000015930	RWD domain containing 1 [Source:ZFIN;Acc:ZDB- GENE-040718-270]	5.6e-05	0.984294	0.897436	6.33847	5.2867
slc1a8b	ENSDARG00000032465	solute carrier family 1 (glutamate transporter), member 8b [Source:ZFIN;Acc:ZDB-GENE-070912- 552]	5.7e-05	2.07587	1.44774	4.08955	1.94379
csnk1db	ENSDARG00000006125	casein kinase 1, delta b [Source:ZFIN;Acc:ZDB-GENE-040426-2385]	5.83e-05	0.894699	0.828226	6.82704	5.87167
arpc4l	ENSDARG00000058225	actin related protein 2/3 complex, subunit 4, like [Source:ZFIN;Acc:ZDB-GENE-040808-18]	5.84e-05	0.963205	0.881199	6.61655	5.58227
cntn3a.1	ENSDARG00000062880	contactin 3a, tandem duplicate 1 [Source:ZFIN;Acc:ZDB-GENE-081030-10]	5.89e-05	1.55373	1.25007	5.70755	4.17009
si:zfos-411a11.3	ENSDARG00000099299	si:zfos-411a11.3 [Source:ZFIN;Acc:ZDB-GENE- 131121-489]	5.95e-05	2.27006	1.48699	4.81934	2.36165
clk4a	ENSDARG00000089372	CDC-like kinase 4a [Source:ZFIN;Acc:ZDB-GENE- 030131-576]	5.96e-05	0.709507	0.675339	7.94227	7.16162
bloc1s6	ENSDARG00000042933	biogenesis of lysosomal organelles complex- 1, subunit 6, pallidin [Source:ZFIN;Acc:ZDB-GENE-070112- 1862]	6.04e-05	1.18411	1.03761	5.99134	4.74098
si:ch211-232m10.6	ENSDARG00000070931	si:ch211-232m10.6 [Source:ZFIN;Acc:ZDB-GENE- 060503-879]	6.24e-05	2.42994	1.51541	3.84303	1.38898
PIP4K2C (2 of 2)	ENSDARG00000091637	phosphatidylinositol-5-phosphate 4-kinase, type II, gamma [Source:HGNC Symbol;Acc:HGNC:23786]	6.28e-05	3.43706	1.5386	3.09064	-0.593087
camkvl	ENSDARG00000057000	CaM kinase-like vesicle-associated, like [Source:ZFIN;Acc:ZDB-GENE-090311-58]	6.31e-05	1.29241	1.10559	5.96407	4.5928
papss2a	ENSDARG00000071021	3'-phosphoadenosine 5'-phosphosulfate synthase 2a [Source:ZFIN;Acc:ZDB-GENE-061110-85]	6.6e-05	0.868969	0.807097	7.24349	6.30697
pdap1b	ENSDARG00000002967	pdgfa associated protein 1b [Source:ZFIN;Acc:ZDB-GENE-040426-942]	6.72e-05	1.08867	0.971565	6.10848	4.91951
MPP4 (2 of 2)	ENSDARG00000076872	membrane protein, palmitoylated 4 (MAGUK p55 subfamily member 4) [Source:HGNC Symbol;Acc:HGNC:13680]	6.79e-05	2.19135	1.46781	4.02235	1.73958
gabarapa	ENSDARG00000035557	GABA(A) receptor-associated protein a [Source:ZFIN;Acc:ZDB-GENE-030131-5174]	6.91e-05	1.319	1.12014	5.32431	3.93632
hmgb1b	ENSDARG00000030479	high mobility group box 1b [Source:ZFIN;Acc:ZDB-GENE-030131-8480]	7e-05	0.685325	0.65397	8.11351	7.35288
pou2f3	ENSDARG00000052387	POU class 2 homeobox 3 [Source:ZFIN;Acc:ZDB- GENE-060512-299]	7.05e-05	1.71061	1.31608	4.5993	2.8319
EGR4	ENSDARG00000077799	early growth response 4 [Source:HGNC Symbol;Acc:HGNC:3241]	7.3e-05	1.61933	1.27578	4.71737	3.07732
sec61b	ENSDARG00000076568	Sec61 beta subunit [Source:ZFIN;Acc:ZDB-GENE- 040718-260]	7.31e-05	1.133	1.00118	5.8402	4.64904
tnnt3b	ENSDARG00000068457	troponin T type 3b (skeletal, fast) [Source:ZFIN;Acc:ZDB-GENE-030520-2]	7.32e-05	0.594257	0.573491	12.6126	11.9435
kctd7	ENSDARG00000061580	potassium channel tetramerization domain containing 7 [Source:ZFIN;Acc:ZDB-GENE-060804-2]	7.35e-05	1.76276	1.33536	4.77293	3.002
crygm2d4	ENSDARG00000087164	crystallin, gamma M2d4 [Source:ZFIN;Acc:ZDB- GENE-060918-3]	7.66e-05	0.791081	0.743188	7.74504	6.88164
fkbp1aa	ENSDARG00000022684	FK506 binding protein 1Aa [Source:ZFIN;Acc:ZDB-GENE-030131-7275]	7.89e-05	0.917757	0.844307	6.97736	5.97266
tnfrsf9a	ENSDARG00000060498	tumor necrosis factor receptor superfamily, member 9a [Source:ZFIN;Acc:ZDB-GENE-060421-8213]	7.92e-05	2.93773	1.52524	3.72046	0.839449
rtn1b	ENSDARG00000021143	reticulon 1b [Source:ZFIN;Acc:ZDB-GENE- 030710-3]	8.17e-05	0.918799	0.844874	6.60584	5.61021
tecpr1b	ENSDARG00000074086	tectonin beta-propeller repeat containing 1b [Source:ZFIN;Acc:ZDB-GENE-100812-12]	8.3e-05	1.49651	1.21374	5.237	3.71322
tmem176l.2	ENSDARG00000089399	transmembrane protein 176l.2 [Source:ZFIN;Acc:ZDB-GENE-080829-12]	8.56e-05	1.9527	1.39568	4.18234	2.16138
hsf2	ENSDARG00000053097	heat shock factor 2 [Source:ZFIN;Acc:ZDB- GENE-011128-1]	8.63e-05	1.29883	1.10448	5.49841	4.14344
nxnl1	ENSDARG00000052035	nucleoredoxin-like 1 [Source:ZFIN;Acc:ZDB- GENE-070424-115]	8.66e-05	1.67348	1.29458	4.56741	2.81609
osbpl7	ENSDARG00000012981	oxysterol binding protein-like 7 [Source:ZFIN;Acc:ZDB-GENE-041010-212]	8.73e-05	0.860601	0.798874	7.09342	6.1659
snrnp70	ENSDARG00000077126	small nuclear ribonucleoprotein 70 (U1) [Source:ZFIN;Acc:ZDB-GENE-040825-2]	9e-05	0.690441	0.657642	7.94247	7.17974
fetub	ENSDARG00000053973	fetuin B [Source:ZFIN;Acc:ZDB-GENE-050208- 4]	9.46e-05	0.598389	0.576678	10.1903	9.52098
tmprss13b	ENSDARG00000077573	transmembrane protease, serine 13b [Source:ZFIN;Acc:ZDB-GENE-090309-2]	9.47e-05	2.85815	1.51363	3.68134	1.0653
katnal2	ENSDARG00000012275	katanin p60 subunit A-like 2 [Source:ZFIN;Acc:ZDB-GENE-051113-156]	9.94e-05	4.83966	1.35069	2.72736	-1.54332
nkap	ENSDARG00000033450	NFKB activating protein [Source:ZFIN;Acc:ZDB- GENE-030131-8064]	9.94e-05	0.842141	0.783433	6.76258	5.84601
arg2	ENSDARG00000039269	arginase 2 [Source:ZFIN;Acc:ZDB-GENE-030131- 1334]	0.000101	0.914555	0.840188	6.50822	5.51966
tcp11l2	ENSDARG00000027316	t-complex 11, testis-specific-like 2 [Source:ZFIN;Acc:ZDB-GENE-040426-1956]	0.000102	1.004	0.90714	6.25452	5.19051
rcan3	ENSDARG00000032623	regulator of calcineurin 3 [Source:ZFIN;Acc:ZDB-GENE-040718-445]	0.000103	1.18171	1.02924	5.54058	4.29086
si:dkey-1d7.3	ENSDARG00000075837	si:dkey-1d7.3 [Source:ZFIN;Acc:ZDB-GENE- 091118-46]	0.000105	1.63405	1.27219	5.03569	3.3162
ccdc114	ENSDARG00000015010	coiled-coil domain containing 114 [Source:ZFIN;Acc:ZDB-GENE-041114-110]	0.000106	2.4649	1.48984	3.63656	1.06788
lactbl1a	ENSDARG00000089063	lactamase, beta-like 1a [Source:ZFIN;Acc:ZDB- GENE-030131-7625]	0.000106	2.27252	1.4612	3.9167	1.54961
C10H21orf59	ENSDARG00000035332	chromosome 21 open reading frame 59 [Source:HGNC Symbol;Acc:HGNC:1301]	0.000107	1.47106	1.19534	4.99405	3.45064
si:ch211-191a16.5	ENSDARG00000096545	si:ch211-191a16.5 [Source:ZFIN;Acc:ZDB-GENE- 121214-56]	0.000107	1.2047	1.04341	5.62354	4.33287
dnajc8	ENSDARG00000059373	DnaJ (Hsp40) homolog, subfamily C, member 8 [Source:ZFIN;Acc:ZDB-GENE-030131-66]	0.000112	0.830244	0.773222	7.57655	7.53019
stk32a	ENSDARG00000079499	serine/threonine kinase 32A [Source:ZFIN;Acc:ZDB-GENE-091204-271]	0.000113	1.9933	1.39598	4.05224	2.07237
zgc:195245	ENSDARG00000078917	zgc:195245 [Source:ZFIN;Acc:ZDB-GENE-081022- 200]	0.000116	2.91388	1.50384	3.33557	0.743126
nfil3-6	ENSDARG00000087188	nuclear factor, interleukin 3 regulated, member 6 [Source:ZFIN;Acc:ZDB-GENE-040704-63]	0.000116	1.56866	1.24051	4.66836	3.03939
ccdc151	ENSDARG00000062978	coiled-coil domain containing 151 [Source:ZFIN;Acc:ZDB-GENE-061013-787]	0.000118	2.27879	1.45415	4.03196	1.78816
srp54	ENSDARG00000098367	signal recognition particle 54 [Source:ZFIN;Acc:ZDB-GENE-040426-818]	0.000118	0.874321	0.807924	6.81465	5.86991
cep290	ENSDARG00000062727	centrosomal protein 290 [Source:ZFIN;Acc:ZDB- GENE-041111-243]	0.00012	0.796933	0.745896	7.52474	6.65441
daw1	ENSDARG00000021462	dynein assembly factor with WDR repeat domains 1 [Source:ZFIN;Acc:ZDB-GENE-050419-255]	0.000122	2.41025	1.47437	3.69726	1.82471
prlra	ENSDARG00000016570	prolactin receptor a [Source:ZFIN;Acc:ZDB- GENE-080103-2]	0.000122	1.1228	0.988275	5.71758	4.49731
otx5	ENSDARG00000043483	orthodenticle homolog 5 [Source:ZFIN;Acc:ZDB- GENE-030508-1]	0.000122	0.992667	0.897287	6.21438	5.14651
si:dkey-206f10.1	ENSDARG00000032838	si:dkey-206f10.1 [Source:ZFIN;Acc:ZDB-GENE- 041014-154]	0.000124	1.3233	1.11254	5.37545	3.99331
slc1a2a	ENSDARG00000052138	solute carrier family 1 (glial high affinity glutamate transporter), member 2a [Source:ZFIN;Acc:ZDB- GENE-100422-11]	0.000124	1.18054	1.0259	5.52147	4.27796
si:dkeyp-72h1.1	ENSDARG00000095347	si:dkeyp-72h1.1 [Source:ZFIN;Acc:ZDB-GENE- 050208-447]	0.000128	1.62706	1.26341	4.61121	2.91013
lect2l	ENSDARG00000033227	leukocyte cell-derived chemotaxin 2 like [Source:ZFIN;Acc:ZDB-GENE-070127-4]	0.000129	3.20778	1.4775	3.32387	-0.3728
si:ch73-1a9.3	ENSDARG00000103919	si:ch73-1a9.3 [Source:ZFIN;Acc:ZDB-GENE- 141216-84]	0.000133	0.617508	0.592898	9.42561	8.74014
bahd1	ENSDARG00000086789	bromo adjacent homology domain containing 1 [Source:ZFIN;Acc:ZDB-GENE-120411-42]	0.000134	1.13698	0.99657	5.66857	4.48023
gmppab	ENSDARG00000023498	GDP-mannose pyrophosphorylase Ab [Source:ZFIN;Acc:ZDB-GENE-040426-1550]	0.000135	1.229	1.05506	5.38443	4.08695
rbm8a	ENSDARG00000016516	RNA binding motif protein 8A [Source:ZFIN;Acc:ZDB-GENE-050306-51]	0.000139	0.916781	0.83953	6.56864	5.57916
hpda	ENSDARG00000018351	4-hydroxyphenylpyruvate dioxygenase a [Source:ZFIN;Acc:ZDB-GENE-040426-986]	0.000139	0.893431	0.821631	6.53377	5.55619
nptna	ENSDARG00000103002	neuroplastin a [Source:ZFIN;Acc:ZDB-GENE- 030804-7]	0.000139	0.847839	0.786002	6.75058	5.8299
c9	ENSDARG00000016319	complement component 9 [Source:ZFIN;Acc:ZDB- GENE-050522-442]	0.000139	0.817034	0.761389	7.35524	6.46818
WIPF3	ENSDARG00000036245	WAS/WASL interacting protein family, member 3 [Source:HGNC Symbol;Acc:HGNC:22004]	0.000143	2.51529	1.47206	3.7029	1.7601
slc8a2a	ENSDARG00000008912	solute carrier family 8 (sodium/calcium exchanger), member 2a [Source:ZFIN;Acc:ZDB-GENE-060531- 155]	0.000143	2.1782	1.42745	3.84637	1.6413
tekt2	ENSDARG00000028973	tektin 2 (testicular) [Source:ZFIN;Acc:ZDB- GENE-040113-1]	0.000148	1.87619	1.34934	4.47697	2.57109
camk1gb	ENSDARG00000008788	calcium/calmodulin-dependent protein kinase IGb [Source:ZFIN;Acc:ZDB-GENE-040426-1694]	0.000148	1.1244	0.98686	5.83685	4.62136
rp1l1b	ENSDARG00000088377	retinitis pigmentosa 1-like 1b [Source:ZFIN;Acc:ZDB-GENE-091204-67]	0.000149	1.32018	1.1072	5.35	3.9609
rom1a	ENSDARG00000019752	retinal outer segment membrane protein 1a [Source:ZFIN;Acc:ZDB-GENE-040426-1765]	0.000153	1.35666	1.12695	5.30115	3.8766
CABZ01089777.1	ENSDARG00000100613	No description	0.000155	1.21732	1.04557	5.44165	4.16226
efhc2	ENSDARG00000004204	EF-hand domain (C-terminal) containing 2 [Source:ZFIN;Acc:ZDB-GENE-031001-10]	0.000156	2.16598	1.42059	3.78882	1.54697
eef1a1a	ENSDARG00000039502	eukaryotic translation elongation factor 1 alpha 1a [Source:ZFIN;Acc:ZDB-GENE-030131-8278]	0.000156	1.06215	0.944116	5.83222	4.69541
rpl34	ENSDARG00000029500	ribosomal protein L34 [Source:ZFIN;Acc:ZDB- GENE-040426-1033]	0.000156	0.771984	0.724152	8.6817	7.87176
CCDC86	ENSDARG00000059908	coiled-coil domain containing 86 [Source:HGNC Symbol;Acc:HGNC:28359]	0.000157	0.998004	0.898678	6.24717	5.19421
sgk1	ENSDARG00000025522	serum/glucocorticoid regulated kinase 1 [Source:ZFIN;Acc:ZDB-GENE-030131-2860]	0.000172	1.11297	0.977378	5.98652	4.82041
atf3	ENSDARG00000007823	activating transcription factor 3 [Source:ZFIN;Acc:ZDB-GENE-040426-728]	0.000173	1.82276	1.32686	4.24697	2.45668
keap1b	ENSDARG00000074634	kelch-like ECH-associated protein 1b [Source:ZFIN;Acc:ZDB-GENE-080508-1]	0.000173	1.19856	1.03227	5.45456	4.17649
C20H2orf71 (1 of 2)	ENSDARG00000095802	chromosome 2 open reading frame 71 [Source:HGNC Symbol;Acc:HGNC:34383]	0.000174	1.72293	1.29165	4.42983	2.62883
nexn	ENSDARG00000095868	Uncharacterized protein [Source:UniProtKB/TrEMBL;Acc:X1WFX1]	0.000175	0.863288	0.796663	7.93627	6.98461
eif1b	ENSDARG00000012688	eukaryotic translation initiation factor 1B [Source:ZFIN;Acc:ZDB-GENE-030131-956]	0.000176	0.886215	0.814395	6.96557	6.00779
prkca	ENSDARG00000039241	protein kinase C, alpha [Source:ZFIN;Acc:ZDB- GENE-050208-100]	0.000179	0.740522	0.697508	7.40846	6.57555
DNAH3	ENSDARG00000068468	dynein, axonemal, heavy chain 3 [Source:HGNC Symbol;Acc:HGNC:2949]	0.000181	1.81844	1.32283	4.60026	2.79018
snrnp40	ENSDARG00000023160	small nuclear ribonucleoprotein 40 (U5) [Source:ZFIN;Acc:ZDB-GENE-040426-978]	0.000182	1.63203	1.25467	4.62679	2.98197
UBE2M	ENSDARG00000101521	ubiquitin-conjugating enzyme E2M [Source:HGNC Symbol;Acc:HGNC:12491]	0.000183	1.01547	0.90969	5.9938	4.97027
SNORA47	ENSDARG00000083424	Small nucleolar RNA SNORA47 [Source:RFAM;Acc:RF01234]	0.000187	0.84211	0.779645	7.23621	6.32621
MYRIP (2 of 2)	ENSDARG00000075706	myosin VIIA and Rab interacting protein [Source:HGNC Symbol;Acc:HGNC:19156]	0.000189	1.34477	1.11618	5.4793	4.11652
s100a10a	ENSDARG00000037425	S100 calcium binding protein A10a [Source:ZFIN;Acc:ZDB-GENE-041010-35]	0.000189	1.23592	1.05373	5.38929	4.08802
lrmp	ENSDARG00000045574	lymphoid-restricted membrane protein [Source:ZFIN;Acc:ZDB-GENE-041210-152]	0.000189	1.03544	0.923389	6.13957	5.04106
col9a1a	ENSDARG00000073699	collagen, type IX, alpha 1a [Source:ZFIN;Acc:ZDB-GENE-080721-25]	0.000209	0.608709	0.583968	8.67458	7.98032
fbxo25	ENSDARG00000075172	F-box protein 25 [Source:ZFIN;Acc:ZDB-GENE- 040801-19]	0.000211	1.24594	1.05789	5.38641	4.02128
fam50a	ENSDARG00000024895	family with sequence similarity 50, member A [Source:ZFIN;Acc:ZDB-GENE-050417-110]	0.000211	0.856277	0.789973	6.60525	5.67452
si:dkey-11p23.9	ENSDARG00000087679	si:dkey-11p23.9 [Source:ZFIN;Acc:ZDB-GENE- 100922-102]	0.000213	4.43656	1.28635	2.62662	-2.16909
si:busm1-57f23.1	ENSDARG00000074425	si:busm1-57f23.1 [Source:ZFIN;Acc:ZDB-GENE- 030616-512]	0.000213	1.23022	1.04824	5.30155	3.99107
cldn7b	ENSDARG00000014047	claudin 7b [Source:ZFIN;Acc:ZDB-GENE-001103- 5]	0.000213	0.966518	0.873056	6.38465	5.36757
si:ch73-52f24.4	ENSDARG00000100697	si:ch73-52f24.4 [Source:ZFIN;Acc:ZDB-GENE- 030131-2681]	0.000213	0.86203	0.794358	6.56486	5.63517
hbegfa	ENSDARG00000075121	heparin-binding EGF-like growth factor a [Source:ZFIN;Acc:ZDB-GENE-080204-119]	0.000223	1.4585	1.17091	5.63593	4.16288
ppp6c	ENSDARG00000002949	protein phosphatase 6, catalytic subunit [Source:ZFIN;Acc:ZDB-GENE-040426-949]	0.000223	0.829451	0.768553	6.63856	5.73185
crygn2	ENSDARG00000030411	crystallin, gamma N2 [Source:ZFIN;Acc:ZDB- GENE-040801-16]	0.000226	0.700426	0.662895	7.55451	6.77775
C21H18orf32	ENSDARG00000057556	chromosome 18 open reading frame 32 [Source:HGNC Symbol;Acc:HGNC:31690]	0.000226	0.657321	0.626101	8.77488	7.92956
si:ch211-57i17.5	ENSDARG00000041375	si:ch211-57i17.5 [Source:ZFIN;Acc:ZDB-GENE- 041014-39]	0.00023	3.61405	1.41729	2.8554	-0.508124
fundc1	ENSDARG00000040822	FUN14 domain containing 1 [Source:ZFIN;Acc:ZDB-GENE-040718-466]	0.000231	1.41805	1.1502	4.96556	3.46509
si:dkey-14o18.2	ENSDARG00000062995	si:dkey-14o18.2 [Source:ZFIN;Acc:ZDB-GENE- 060503-145]	0.000234	1.62691	1.24429	4.56048	3.03028
SNORD22	ENSDARG00000083784	Small nucleolar RNA SNORD22 [Source:RFAM;Acc:RF00099]	0.000235	2.2514	1.41021	3.96443	1.75713
rx1	ENSDARG00000071684	retinal homeobox gene 1 [Source:ZFIN;Acc:ZDB- GENE-990415-236]	0.000235	1.28599	1.07896	5.17409	3.82514
PPEF2 (2 of 2)	ENSDARG00000104980	protein phosphatase, EF-hand calcium binding domain 2 [Source:HGNC Symbol;Acc:HGNC:9244]	0.000238	1.2721	1.07081	5.19521	3.82868
unc119b	ENSDARG00000044362	unc-119 homolog b (C. elegans) [Source:ZFIN;Acc:ZDB-GENE-050201-2]	0.000239	1.11148	0.97197	5.76135	4.57171
pdcd5	ENSDARG00000026072	programmed cell death 5 [Source:ZFIN;Acc:ZDB- GENE-040426-980]	0.00024	1.14989	0.996635	5.49443	4.26572
uox	ENSDARG00000007024	urate oxidase [Source:ZFIN;Acc:ZDB-GENE- 030826-24]	0.00024	0.976069	0.878737	6.22911	5.22068
st3gal1l	ENSDARG00000079310	ST3 beta-galactoside alpha-2,3- sialyltransferase 1, like [Source:ZFIN;Acc:ZDB-GENE-060321- 2]	0.000251	3.61971	1.40646	2.64706	-1.04332
zgc:195356	ENSDARG00000099134	zgc:195356 [Source:ZFIN;Acc:ZDB-GENE-030131- 6619]	0.000256	4.03628	1.33132	2.66257	-1.99676
gmds	ENSDARG00000026629	GDP-mannose 4,6-dehydratase [Source:ZFIN;Acc:ZDB-GENE-050419-45]	0.000257	0.869111	0.798484	6.60922	5.67727
rps11	ENSDARG00000053058	ribosomal protein S11 [Source:ZFIN;Acc:ZDB- GENE-040426-2701]	0.000258	0.669009	0.635681	8.1723	7.42738
tmem237a	ENSDARG00000041735	transmembrane protein 237a [Source:ZFIN;Acc:ZDB-GENE-070402-3]	0.000261	1.00495	0.89849	5.94284	4.86269
cda	ENSDARG00000038199	cytidine deaminase [Source:ZFIN;Acc:ZDB-GENE- 040426-1911]	0.000263	1.49151	1.18201	4.79831	3.29619
akt1s1	ENSDARG00000074667	AKT1 substrate 1 (proline-rich) [Source:ZFIN;Acc:ZDB-GENE-030131-482]	0.000267	0.784752	0.731743	7.00238	6.13557
fam177a1	ENSDARG00000079636	family with sequence similarity 177, member A1 [Source:ZFIN;Acc:ZDB-GENE-070928-21]	0.000274	0.999601	0.894121	6.30973	5.22596
hnrnpl2	ENSDARG00000059303	heterogeneous nuclear ribonucleoprotein L2 [Source:ZFIN;Acc:ZDB-GENE-040426-2707]	0.000278	0.754876	0.707248	7.42743	6.60267
kti12	ENSDARG00000054301	KTI12 homolog, chromatin associated (S. cerevisiae) [Source:ZFIN;Acc:ZDB-GENE-060825-174]	0.000281	1.59144	1.22387	4.46321	2.81472
rnf115	ENSDARG00000062450	ring finger protein 115 [Source:ZFIN;Acc:ZDB- GENE-061215-82]	0.000283	1.52916	1.19705	4.68388	3.33413
gpx4a	ENSDARG00000068478	glutathione peroxidase 4a [Source:ZFIN;Acc:ZDB-GENE-030410-2]	0.00029	0.641513	0.61163	8.5358	7.86688
SLC9A3R2 (1 of 2)	ENSDARG00000057669	solute carrier family 9, subfamily A (NHE3, cation proton antiporter 3), member 3 regulator 2 [Source:HGNC Symbol;Acc:HGNC:11076]	0.000294	1.3456	1.107	4.94856	3.53599
sdr42e2	ENSDARG00000059914	short chain dehydrogenase/reductase family 42E, member 2 [Source:ZFIN;Acc:ZDB-GENE-101203-3]	0.000295	1.67834	1.2557	4.55238	2.80574
zgc:193541	ENSDARG00000092873	zgc:193541 [Source:ZFIN;Acc:ZDB-GENE-081022- 15]	0.000298	1.24206	1.04909	5.27378	3.99103
ndufb10	ENSDARG00000028889	NADH dehydrogenase (ubiquinone) 1 beta subcomplex, 10 [Source:ZFIN;Acc:ZDB-GENE-040426-1691]	0.00031	0.926803	0.840419	6.14696	5.14257
PPAP2A	ENSDARG00000053381	phosphatidic acid phosphatase type 2A [Source:HGNC Symbol;Acc:HGNC:9228]	0.000315	1.25088	1.05311	5.66429	4.44489
nrgna	ENSDARG00000039626	neurogranin (protein kinase C substrate, RC3) a [Source:ZFIN;Acc:ZDB-GENE-090710-4]	0.000316	1.29841	1.07985	5.03186	3.67746
anp32a	ENSDARG00000006487	acidic (leucine-rich) nuclear phosphoprotein 32 family, member A [Source:ZFIN;Acc:ZDB-GENE-030131- 7850]	0.000316	0.586487	0.563254	9.26054	8.59691
gabrr2a	ENSDARG00000052982	gamma-aminobutyric acid (GABA) A receptor, rho 2a [Source:ZFIN;Acc:ZDB-GENE-060825-164]	0.000319	1.94008	1.33202	4.72658	2.80377
stoml3a	ENSDARG00000079914	stomatin (EPB72)-like 3a [Source:ZFIN;Acc:ZDB-GENE-070620-18]	0.000321	2.9583	1.42219	2.99729	0.0678775
gtpbp1	ENSDARG00000053467	GTP binding protein 1 [Source:ZFIN;Acc:ZDB- GENE-030909-12]	0.000321	1.03576	0.917457	6.91657	5.86325
tsc22d1	ENSDARG00000038306	TSC22 domain family, member 1 [Source:ZFIN;Acc:ZDB-GENE-030131-7785]	0.000321	0.741401	0.695456	7.23012	6.42176
zgc:91910	ENSDARG00000035678	zgc:91910 [Source:ZFIN;Acc:ZDB-GENE-040808- 48]	0.000325	1.0041	0.895429	5.87187	4.77422
s100a10b	ENSDARG00000025254	S100 calcium binding protein A10b [Source:ZFIN;Acc:ZDB-GENE-040426-1937]	0.000325	0.899378	0.819568	6.31636	5.33461
myclb	ENSDARG00000034956	v-myc avian myelocytomatosis viral oncogene lung carcinoma derived homolog b [Source:ZFIN;Acc:ZDB-GENE- 030131-5561]	0.000325	0.893712	0.815331	6.25848	5.30089
H3F3B	ENSDARG00000068436	H3 histone, family 3B (H3.3B) [Source:HGNC Symbol;Acc:HGNC:4765]	0.000325	0.697254	0.658708	7.59336	6.82752
btf3l4	ENSDARG00000089681	basic transcription factor 3-like 4 [Source:ZFIN;Acc:ZDB-GENE-040426-1650]	0.000329	1.05083	0.927295	5.9845	4.88774
cfap57	ENSDARG00000058090	cilia and flagella associated protein 57 [Source:ZFIN;Acc:ZDB-GENE-110411-266]	0.000331	1.46362	1.16251	4.89629	3.40308
CABZ01014623.1	ENSDARG00000057527	Uncharacterized protein [Source:UniProtKB/TrEMBL;Acc:E7FBV1]	0.000331	1.25578	1.05485	5.3378	4.05172
casq2	ENSDARG00000008982	calsequestrin 2 [Source:ZFIN;Acc:ZDB-GENE- 010724-12]	0.000334	0.835118	0.770212	6.66435	5.76415
pcp4l1	ENSDARG00000023181	Purkinje cell protein 4 like 1 [Source:ZFIN;Acc:ZDB-GENE-040724-35]	0.000347	1.4721	1.16519	4.7428	3.20979
ip6k2b	ENSDARG00000019613	inositol hexakisphosphate kinase 2b [Source:ZFIN;Acc:ZDB-GENE-040718-85]	0.000347	0.845982	0.778394	6.54271	5.62051
tardbp	ENSDARG00000040031	TAR DNA binding protein [Source:ZFIN;Acc:ZDB- GENE-030131-3777]	0.000348	0.6665	0.632404	7.76707	7.0149
rom1b	ENSDARG00000026926	retinal outer segment membrane protein 1b [Source:ZFIN;Acc:ZDB-GENE-040426-1073]	0.000351	1.15811	0.995779	5.46669	4.24879
fbl	ENSDARG00000053912	fibrillarin [Source:ZFIN;Acc:ZDB-GENE-040426- 1936]	0.000356	0.826868	0.763333	6.99944	6.10829
gamt	ENSDARG00000070844	guanidinoacetate N-methyltransferase [Source:ZFIN;Acc:ZDB-GENE-051030-97]	0.000356	0.69421	0.655747	7.59614	6.82168
si:dkey-253i9.4	ENSDARG00000061459	si:dkey-253i9.4 [Source:ZFIN;Acc:ZDB-GENE- 090313-280]	0.000357	0.745142	0.697943	7.32419	6.50491
plch1	ENSDARG00000079253	phospholipase C, eta 1 [Source:ZFIN;Acc:ZDB- GENE-060503-398]	0.000364	0.799472	0.741601	6.75949	5.88071
ndufb8	ENSDARG00000010113	NADH dehydrogenase (ubiquinone) 1 beta subcomplex, 8 [Source:ZFIN;Acc:ZDB-GENE-040426-1858]	0.000368	0.901943	0.820362	6.52763	5.57153
zmat2	ENSDARG00000004956	zinc finger, matrin-type 2 [Source:ZFIN;Acc:ZDB-GENE-030131-3197]	0.00037	1.02577	0.908746	5.85841	4.75104
C20H2orf44	ENSDARG00000016528	chromosome 2 open reading frame 44 [Source:HGNC Symbol;Acc:HGNC:26157]	0.000372	1.49524	1.17323	4.99534	3.26262
pdca	ENSDARG00000011886	phosducin a [Source:ZFIN;Acc:ZDB-GENE-031023- 1]	0.000376	2.06922	1.35197	4.02353	1.99473
SAT1 (3 of 3)	ENSDARG00000095908	spermidine/spermine N1-acetyltransferase 1 [Source:HGNC Symbol;Acc:HGNC:10540]	0.000381	1.05741	0.929753	5.61064	4.50876
ypel3	ENSDARG00000055510	yippee-like 3 [Source:ZFIN;Acc:ZDB-GENE- 030516-4]	0.000384	1.64295	1.23271	4.38529	2.65284
rdh8a	ENSDARG00000028048	retinol dehydrogenase 8a [Source:ZFIN;Acc:ZDB-GENE-021115-3]	0.000393	1.12938	0.975929	5.46859	4.28757
chrna10a	ENSDARG00000011113	cholinergic receptor, nicotinic, alpha 10a [Source:ZFIN;Acc:ZDB-GENE-060503-725]	0.000399	2.88009	1.39718	3.12173	0.310591
zgc:171927	ENSDARG00000033056	zgc:171927 [Source:ZFIN;Acc:ZDB-GENE-070822- 21]	0.000409	3.10671	1.39214	2.84303	-0.3358
ano2	ENSDARG00000101363	anoctamin 2 [Source:ZFIN;Acc:ZDB-GENE-060503- 62]	0.000409	1.15054	0.988409	5.74008	4.549
EMB	ENSDARG00000059485	embigin [Source:HGNC Symbol;Acc:HGNC:30465]	0.000422	2.80026	1.38905	3.35643	0.817914
TMEM74 (2 of 2)	ENSDARG00000091623	transmembrane protein 74 [Source:HGNC Symbol;Acc:HGNC:26409]	0.000432	2.20411	1.36647	3.70941	1.43842
C7orf50	ENSDARG00000045254	chromosome 7 open reading frame 50 [Source:HGNC Symbol;Acc:HGNC:22421]	0.000438	1.72637	1.25618	4.6917	2.88546
UQCR10	ENSDARG00000104517	ubiquinol-cytochrome c reductase, complex III subunit X [Source:HGNC Symbol;Acc:HGNC:30863]	0.000439	1.13135	0.975417	5.53757	4.31791
mknk2a	ENSDARG00000011373	MAP kinase interacting serine/threonine kinase 2a [Source:ZFIN;Acc:ZDB-GENE-030131-6099]	0.00044	1.30546	1.07611	4.97221	3.60651
ubb	ENSDARG00000093313	ubiquitin B [Source:ZFIN;Acc:ZDB-GENE-050411- 10]	0.000442	0.834249	0.767468	7.57982	6.65616
apoc2	ENSDARG00000092155	apolipoprotein C-II [Source:ZFIN;Acc:ZDB- GENE-030131-2168]	0.000442	0.696606	0.656775	7.43814	6.67599
taf12	ENSDARG00000104030	TAF12 RNA polymerase II, TATA box binding protein (TBP)-associated factor [Source:ZFIN;Acc:ZDB-GENE- 031030-5]	0.000446	0.847342	0.777465	6.44754	5.53682
slc24a2	ENSDARG00000042988	solute carrier family 24 (sodium/potassium/calcium exchanger), member 2 [Source:ZFIN;Acc:ZDB-GENE-060825-277]	0.000449	1.30234	1.07381	5.87182	4.56572
polr2f	ENSDARG00000036625	polymerase (RNA) II (DNA directed) polypeptide F [Source:ZFIN;Acc:ZDB-GENE-040718-279]	0.000457	1.17984	1.00426	5.28112	4.02466
ube2e3	ENSDARG00000012244	ubiquitin-conjugating enzyme E2E 3 (UBC4/5 homolog, yeast) [Source:ZFIN;Acc:ZDB-GENE-030131-408]	0.000457	0.854542	0.782787	6.5447	5.62008
arhgap20	ENSDARG00000089326	Rho GTPase activating protein 20 [Source:ZFIN;Acc:ZDB-GENE-071015-1]	0.000458	1.96927	1.3211	3.91158	2.23704
raf1b	ENSDARG00000059406	Raf-1 proto-oncogene, serine/threonine kinase b [Source:ZFIN;Acc:ZDB-GENE-090826-2]	0.000459	1.07685	0.939896	5.51695	4.40093
vta1	ENSDARG00000013732	vesicle (multivesicular body) trafficking 1 [Source:ZFIN;Acc:ZDB-GENE-040426-2154]	0.000461	0.965308	0.864076	6.00296	4.96587
ube2ka	ENSDARG00000089055	ubiquitin-conjugating enzyme E2Ka (UBC1 homolog, yeast) [Source:ZFIN;Acc:ZDB-GENE-050320-48]	0.000462	1.17278	0.999795	5.24618	4.00692
SKOR2	ENSDARG00000063614	SKI family transcriptional corepressor 2 [Source:HGNC Symbol;Acc:HGNC:32695]	0.000464	2.02286	1.3303	4.11967	2.14594
pitpnab	ENSDARG00000044091	phosphatidylinositol transfer protein, alpha b [Source:ZFIN;Acc:ZDB-GENE-110408-51]	0.000492	0.787901	0.730423	6.87374	6.01301
ift22	ENSDARG00000020822	intraflagellar transport 22 homolog (Chlamydomonas) [Source:ZFIN;Acc:ZDB-GENE-050417-439]	0.000497	2.38173	1.37608	5.09752	4.28784
eya1	ENSDARG00000014259	EYA transcriptional coactivator and phosphatase 1 [Source:ZFIN;Acc:ZDB-GENE-990712-18]	0.000498	0.846318	0.775761	7.27234	6.35126
mrpl19	ENSDARG00000011885	mitochondrial ribosomal protein L19 [Source:ZFIN;Acc:ZDB-GENE-040801-55]	0.000506	1.18148	1.00329	5.19685	3.9413
fth1a	ENSDARG00000015551	ferritin, heavy polypeptide 1a [Source:ZFIN;Acc:ZDB-GENE-000831-2]	0.000513	0.652814	0.619203	8.74197	8.02642
kitb	ENSDARG00000056133	v-kit Hardy-Zuckerman 4 feline sarcoma viral oncogene homolog b [Source:ZFIN;Acc:ZDB-GENE-050916-2]	0.000519	1.25822	1.04653	5.40655	4.2155
ybx1	ENSDARG00000004757	Y box binding protein 1 [Source:ZFIN;Acc:ZDB- GENE-000629-3]	0.000522	0.534224	0.515436	9.66887	9.06328
si:ch73-71c20.5	ENSDARG00000097696	si:ch73-71c20.5 [Source:ZFIN;Acc:ZDB-GENE- 060810-58]	0.000529	1.71134	1.24292	4.54259	2.89545
doc2b	ENSDARG00000088293	double C2-like domains, beta [Source:ZFIN;Acc:ZDB-GENE-090615-1]	0.000538	0.953662	0.854072	6.18139	5.19252
dusp19a	ENSDARG00000040490	dual specificity phosphatase 19a [Source:ZFIN;Acc:ZDB-GENE-081104-382]	0.000539	2.35546	1.36614	3.47293	1.08317
kif6	ENSDARG00000053240	kinesin family member 6 [Source:ZFIN;Acc:ZDB- GENE-061027-130]	0.000539	2.21566	1.35095	3.85553	1.87565
fgfr1op	ENSDARG00000003058	FGFR1 oncogene partner [Source:ZFIN;Acc:ZDB- GENE-090417-1]	0.000541	0.979394	0.872034	5.78703	4.74163
si:dkey-42i9.4	ENSDARG00000008049	si:dkey-42i9.4 [Source:ZFIN;Acc:ZDB-GENE- 030131-8398]	0.000551	1.36917	1.10285	4.79463	3.36709
cfap58	ENSDARG00000069435	cilia and flagella associated protein 58 [Source:ZFIN;Acc:ZDB-GENE-060929-128]	0.000558	1.89489	1.29231	4.1613	2.25713
baxa	ENSDARG00000089129	bcl2-associated X protein, a [Source:ZFIN;Acc:ZDB-GENE-000511-6]	0.000562	0.973891	0.867745	5.97959	4.92525
si:ch1073-469d17.2	ENSDARG00000101485	si:ch1073-469d17.2 [Source:ZFIN;Acc:ZDB-GENE- 141216-487]	0.000564	1.3882	1.11154	4.70612	3.24464
crygm2d7	ENSDARG00000076572	crystallin, gamma M2d7 [Source:ZFIN;Acc:ZDB- GENE-060918-5]	0.000571	0.904122	0.817759	6.84269	5.87449
calm1a	ENSDARG00000021811	calmodulin 1a [Source:ZFIN;Acc:ZDB-GENE- 030131-8308]	0.000574	0.572169	0.548936	8.91949	8.2733
ak9	ENSDARG00000021913	adenylate kinase 9 [Source:ZFIN;Acc:ZDB-GENE- 041014-337]	0.000577	1.82218	1.27252	4.07729	2.27136
wbp2	ENSDARG00000056605	WW domain binding protein 2 [Source:ZFIN;Acc:ZDB-GENE-050522-137]	0.000578	1.26236	1.04638	5.26531	3.88334
alg9	ENSDARG00000012840	ALG9, alpha-1,2-mannosyltransferase [Source:ZFIN;Acc:ZDB-GENE-040426-1270]	0.000579	1.34015	1.0869	5.42835	4.07425
dnajc5ga	ENSDARG00000041896	DnaJ (Hsp40) homolog, subfamily C, member 5 gamma a [Source:ZFIN;Acc:ZDB-GENE-030131-1583]	0.000586	1.01254	0.893722	5.68176	4.59158
rps27.1	ENSDARG00000023298	ribosomal protein S27, isoform 1 [Source:ZFIN;Acc:ZDB-GENE-050522-549]	0.000588	0.606435	0.578821	8.41033	7.7423
ndufs7	ENSDARG00000074552	NADH dehydrogenase (ubiquinone) Fe-S protein 7, (NADH-coenzyme Q reductase) [Source:ZFIN;Acc:ZDB-GENE- 041111-261]	0.000589	0.925688	0.833065	6.37887	5.40428
TMC5	ENSDARG00000013252	transmembrane channel-like 5 [Source:HGNC Symbol;Acc:HGNC:22999]	0.00059	1.50181	1.16099	5.35736	4.06445
psmb4	ENSDARG00000054696	proteasome (prosome, macropain) subunit, beta type, 4 [Source:ZFIN;Acc:ZDB-GENE-050417-333]	0.000595	0.896606	0.811817	6.28528	5.32601
CR847986.1	ENSDARG00000061850	Uncharacterized protein [Source:UniProtKB/TrEMBL;Acc:E7FDN3]	0.000605	2.08826	1.32662	3.8188	1.70793
pvalb5	ENSDARG00000032836	parvalbumin 5 [Source:ZFIN;Acc:ZDB-GENE- 050417-336]	0.000605	1.03403	0.907663	5.62123	4.51954
abcg1	ENSDARG00000063475	ATP-binding cassette, sub-family G (WHITE), member 1 [Source:ZFIN;Acc:ZDB-GENE-070424-84]	0.000613	1.30905	1.06978	4.86759	3.4917
fam57ba	ENSDARG00000026875	family with sequence similarity 57, member Ba [Source:ZFIN;Acc:ZDB-GENE-030131-2046]	0.000614	1.10696	0.954395	5.86219	4.6618
ensaa	ENSDARG00000036944	endosulfine alpha a [Source:ZFIN;Acc:ZDB- GENE-060503-181]	0.000616	1.08985	0.943553	5.51725	4.3427
RHOBTB1	ENSDARG00000079468	Rho-related BTB domain containing 1 [Source:HGNC Symbol;Acc:HGNC:18738]	0.000621	1.22582	1.02451	5.1419	3.88435
zgc:92380	ENSDARG00000041339	zgc:92380 [Source:ZFIN;Acc:ZDB-GENE-040801- 221]	0.000632	0.832527	0.763254	6.38223	5.49134
mmp17b	ENSDARG00000102956	matrix metallopeptidase 17b [Source:ZFIN;Acc:ZDB-GENE-081107-17]	0.000633	1.43749	1.13091	4.61033	3.10246
cox4i2	ENSDARG00000022509	cytochrome c oxidase subunit IV isoform 2 [Source:ZFIN;Acc:ZDB-GENE-040426-1775]	0.00065	1.73535	1.24127	4.56755	3.01407
cyp39a1	ENSDARG00000017982	cytochrome P450, family 39, subfamily A, polypeptide 1 [Source:ZFIN;Acc:ZDB-GENE-041014-339]	0.000651	3.3313	1.32127	2.92299	1.23295
ubl3a	ENSDARG00000099532	ubiquitin-like 3a [Source:ZFIN;Acc:ZDB-GENE- 030131-3431]	0.000661	0.765233	0.71043	6.84497	5.99698
tmprss3a	ENSDARG00000053315	transmembrane protease, serine 3a [Source:ZFIN;Acc:ZDB-GENE-070912-70]	0.000663	2.58423	1.3601	3.21366	0.92911
tpma	ENSDARG00000033683	alpha-tropomyosin [Source:ZFIN;Acc:ZDB-GENE- 990415-269]	0.000675	0.539399	0.519441	12.3615	11.7524
sh3gl2	ENSDARG00000023600	SH3-domain GRB2-like 2 [Source:ZFIN;Acc:ZDB- GENE-040121-3]	0.000676	0.735776	0.686666	7.01317	6.20942
slmo2	ENSDARG00000009505	slowmo homolog 2 (Drosophila) [Source:ZFIN;Acc:ZDB-GENE-031002-13]	0.000676	0.723319	0.676565	7.04821	6.26059
rplp1	ENSDARG00000021864	ribosomal protein, large, P1 [Source:ZFIN;Acc:ZDB-GENE-030131-8663]	0.000678	0.567619	0.544435	9.05286	8.40925
atp5g1	ENSDARG00000056008	ATP synthase, H+ transporting, mitochondrial Fo complex, subunit C1 (subunit 9) [Source:ZFIN;Acc:ZDB- GENE-040426-1966]	0.000682	0.973833	0.865282	6.07359	5.06232
dnajb6a	ENSDARG00000004680	DnaJ (Hsp40) homolog, subfamily B, member 6a [Source:ZFIN;Acc:ZDB-GENE-040718-45]	0.000692	0.849142	0.775065	6.46081	5.52946
gpr156	ENSDARG00000086215	G protein-coupled receptor 156 [Source:ZFIN;Acc:ZDB-GENE-060201-2]	0.000695	1.80565	1.25866	3.98873	2.10705
h3f3b.1	ENSDARG00000033009	H3 histone, family 3B.1 [Source:ZFIN;Acc:ZDB- GENE-050417-65]	0.000696	0.806334	0.742307	7.2386	6.34402
hydin	ENSDARG00000056764	HYDIN, axonemal central pair apparatus protein [Source:ZFIN;Acc:ZDB-GENE-050419-219]	0.00071	1.14246	0.973361	5.94124	4.80443
eif1ad	ENSDARG00000016280	eukaryotic translation initiation factor 1A domain containing [Source:ZFIN;Acc:ZDB-GENE-040426-1199]	0.000712	1.11538	0.956869	6.13201	5.01059
pttg1ipb	ENSDARG00000040039	pituitary tumor-transforming 1 interacting protein b [Source:ZFIN;Acc:ZDB-GENE-041010-10]	0.000716	1.52201	1.16265	4.44432	2.87943
rhol	ENSDARG00000070666	rhodopsin, like [Source:ZFIN;Acc:ZDB-GENE- 070424-6]	0.000733	3.18528	1.31521	2.8209	-0.189409
baiap2l1b	ENSDARG00000031119	BAI1-associated protein 2-like 1b [Source:ZFIN;Acc:ZDB-GENE-050417-371]	0.000737	0.951138	0.848554	5.89522	4.87306
rplp2l	ENSDARG00000011201	ribosomal protein, large P2, like [Source:ZFIN;Acc:ZDB-GENE-070327-2]	0.00074	0.622805	0.59211	9.02584	8.35482
TMPRSS7	ENSDARG00000086161	transmembrane protease, serine 7 [Source:HGNC Symbol;Acc:HGNC:30846]	0.00075	2.17202	1.32519	3.61985	1.35778
si:dkey-30e9.6	ENSDARG00000099361	si:dkey-30e9.6 [Source:ZFIN;Acc:ZDB-GENE- 131121-308]	0.000751	7.71113	0.803897	1.04607	-3.64877
pih1d3	ENSDARG00000038612	PIH1 domain containing 3 [Source:ZFIN;Acc:ZDB-GENE-040722-2]	0.000752	4.7027	1.16497	2.17957	-2.70428
camk1db	ENSDARG00000017446	calcium/calmodulin-dependent protein kinase 1Db [Source:ZFIN;Acc:ZDB-GENE-070112-1872]	0.000776	1.20496	1.00808	5.22923	3.99235
psmd11a	ENSDARG00000060150	proteasome (prosome, macropain) 26S subunit, non-ATPase, 11a [Source:ZFIN;Acc:ZDB-GENE-030131-2711]	0.00079	0.912313	0.820286	6.01274	5.0259
IQCG	ENSDARG00000068678	IQ motif containing G [Source:HGNC Symbol;Acc:HGNC:25251]	0.000793	2.81096	1.34251	2.92346	0.306901
cdh23	ENSDARG00000094454	cadherin-related 23 [Source:ZFIN;Acc:ZDB- GENE-040513-7]	0.000793	1.37237	1.0939	5.79808	4.71719
v2rl1	ENSDARG00000005942	vomeronasal 2 receptor, l1 [Source:ZFIN;Acc:ZDB-GENE-050419-65]	0.000799	2.87932	1.33219	3.10357	-0.080319
iscub	ENSDARG00000026582	iron-sulfur cluster assembly enzyme b [Source:ZFIN;Acc:ZDB-GENE-050417-332]	0.000805	2.38548	1.33902	3.28167	0.856916
ubiad1	ENSDARG00000013009	UbiA prenyltransferase domain containing 1 [Source:ZFIN;Acc:ZDB-GENE-030131-3205]	0.00082	1.24154	1.02697	5.01926	3.71571
CNGB3 (2 of 2)	ENSDARG00000101368	cyclic nucleotide gated channel beta 3 [Source:HGNC Symbol;Acc:HGNC:2153]	0.000822	1.54918	1.16824	4.39746	2.78567
CALHM1 (1 of 2)	ENSDARG00000005314	calcium homeostasis modulator 1 [Source:HGNC Symbol;Acc:HGNC:23494]	0.000824	4.11843	1.22552	2.23594	-1.99676
CU681855.1	ENSDARG00000103377	No description	0.000826	2.63333	1.33778	3.49729	1.67649
or132-5	ENSDARG00000056277	odorant receptor, family H, subfamily 132, member 5 [Source:ZFIN;Acc:ZDB-GENE-070806-21]	0.000827	4.63099	1.17753	2.09953	-1.9118
pla2g7	ENSDARG00000003584	phospholipase A2, group VII (platelet- activating factor acetylhydrolase, plasma) [Source:ZFIN;Acc:ZDB-GENE-040426-2248]	0.000827	0.949294	0.845872	5.82476	4.79963
klf11b	ENSDARG00000013794	Kruppel-like factor 11b [Source:ZFIN;Acc:ZDB- GENE-061103-82]	0.000829	1.10065	0.945177	5.31065	4.15427
upf3b	ENSDARG00000000489	UPF3 regulator of nonsense transcripts homolog B (yeast) [Source:ZFIN;Acc:ZDB-GENE-040426-1630]	0.000834	0.920409	0.825393	6.87623	5.90772
si:ch211-137a8.4	ENSDARG00000078748	si:ch211-137a8.4 [Source:ZFIN;Acc:ZDB-GENE- 030131-3742]	0.000837	0.578072	0.552963	8.26443	7.6244
cacna1fa	ENSDARG00000010933	calcium channel, voltage-dependent, L type, alpha 1F subunit a [Source:ZFIN;Acc:ZDB-GENE-091204-7]	0.000841	0.931239	0.832976	6.55028	5.57552
rpl36a	ENSDARG00000058105	ribosomal protein L36A [Source:ZFIN;Acc:ZDB- GENE-020423-1]	0.000859	0.612941	0.583073	7.72821	7.03614
arl1	ENSDARG00000101680	ADP-ribosylation factor-like 1 [Source:ZFIN;Acc:ZDB-GENE-040718-175]	0.000867	0.975219	0.863146	5.84119	4.90677
cdcp2	ENSDARG00000075866	CUB domain containing protein 2 [Source:ZFIN;Acc:ZDB-GENE-070705-485]	0.000879	2.83244	1.32695	3.53403	1.28245
gnb1b	ENSDARG00000104372	guanine nucleotide binding protein (G protein), beta polypeptide 1b [Source:ZFIN;Acc:ZDB-GENE- 040426-2855]	0.000879	0.617135	0.586584	8.87568	8.17223
si:ch211-7c8.2	ENSDARG00000098378	si:ch211-7c8.2 [Source:ZFIN;Acc:ZDB-GENE- 141222-98]	0.000895	1.49945	1.14548	4.46742	2.93591
pfkpb	ENSDARG00000012801	phosphofructokinase, platelet b [Source:ZFIN;Acc:ZDB-GENE-070912-634]	0.000916	0.882839	0.797369	6.19218	5.25757
si:ch211-132f19.7	ENSDARG00000043141	si:ch211-132f19.7 [Source:ZFIN;Acc:ZDB-GENE- 130530-619]	0.000926	1.25736	1.03235	5.05328	3.70939
slc7a14b	ENSDARG00000079231	solute carrier family 7, member 14b [Source:ZFIN;Acc:ZDB-GENE-091113-47]	0.000927	2.14374	1.30598	3.66509	1.69939
nsfa	ENSDARG00000007654	N-ethylmaleimide-sensitive factor a [Source:ZFIN;Acc:ZDB-GENE-030616-37]	0.000927	0.600832	0.572369	8.16255	7.48341
crygm2d14	ENSDARG00000087301	crystallin, gamma M2d14 [Source:ZFIN;Acc:ZDB- GENE-070822-20]	0.000932	1.01945	0.891679	5.94589	4.85794
tvp23b	ENSDARG00000057060	trans-golgi network vesicle protein 23 homolog B (S. cerevisiae) [Source:ZFIN;Acc:ZDB-GENE-050522- 404]	0.000933	1.40013	1.10174	4.7746	3.28917
OSCP1 (1 of 2)	ENSDARG00000101888	organic solute carrier partner 1 [Source:HGNC Symbol;Acc:HGNC:29971]	0.000945	1.50592	1.14597	4.54419	2.97284
psmc6	ENSDARG00000037038	proteasome (prosome, macropain) 26S subunit, ATPase, 6 [Source:ZFIN;Acc:ZDB-GENE-030131-304]	0.000957	0.782396	0.721303	6.60272	5.74188
sesn2	ENSDARG00000070012	sestrin 2 [Source:ZFIN;Acc:ZDB-GENE-070108- 1]	0.000971	2.01612	1.28458	3.78181	1.76404
fam114a2	ENSDARG00000079508	family with sequence similarity 114, member A2 [Source:ZFIN;Acc:ZDB-GENE-030131-6308]	0.000984	0.927108	0.828201	6.25011	5.2644
pde6d	ENSDARG00000074892	phosphodiesterase 6D, cGMP-specific, rod, delta [Source:ZFIN;Acc:ZDB-GENE-040718-463]	0.000986	1.62502	1.18751	4.294	2.6272
hnrnph1l	ENSDARG00000005551	heterogeneous nuclear ribonucleoprotein H1, like [Source:ZFIN;Acc:ZDB-GENE-030131-275]	0.00101154	0.795838	0.731259	6.53229	5.66309
cnppd1	ENSDARG00000027078	cyclin Pas1/PHO80 domain containing 1 [Source:ZFIN;Acc:ZDB-GENE-030131-6808]	0.00101408	0.851681	0.773409	6.24759	5.32591
SAMD4B	ENSDARG00000086735	sterile alpha motif domain containing 4B [Source:HGNC Symbol;Acc:HGNC:25492]	0.001015	0.651466	0.615045	7.48171	6.74505
cdh23	ENSDARG00000094454	cadherin-related 23 [Source:ZFIN;Acc:ZDB- GENE-040513-7]	0.00102557	1.63354	1.18841	4.36794	2.65069
tbca	ENSDARG00000016754	tubulin cofactor a [Source:ZFIN;Acc:ZDB-GENE- 040426-962]	0.00102631	1.16896	0.98145	5.14928	3.92242
rnf25	ENSDARG00000027182	ring finger protein 25 [Source:ZFIN;Acc:ZDB- GENE-040426-1581]	0.00103441	1.05537	0.91304	5.45458	4.30777
C6H1orf159	ENSDARG00000086336	chromosome 1 open reading frame 159 [Source:HGNC Symbol;Acc:HGNC:26062]	0.00105074	2.3595	1.31106	3.50363	1.1864
MAP3K14 (1 of 2)	ENSDARG00000056582	mitogen-activated protein kinase kinase kinase 14 [Source:HGNC Symbol;Acc:HGNC:6853]	0.00105524	1.15739	0.974169	5.26653	4.05652
si:dkey-221j11.3	ENSDARG00000093304	si:dkey-221j11.3 [Source:ZFIN;Acc:ZDB-GENE- 090313-247]	0.00106338	1.36732	1.08271	4.67076	3.2506
ndrg1a	ENSDARG00000032849	N-myc downstream regulated 1a [Source:ZFIN;Acc:ZDB-GENE-030826-34]	0.00106857	0.637573	0.603124	7.70666	6.98937
abca4b	ENSDARG00000062661	ATP-binding cassette, sub-family A (ABC1), member 4b [Source:ZFIN;Acc:ZDB-GENE-050517-4]	0.00110853	0.843573	0.766547	6.35449	5.43591
zgc:65851	ENSDARG00000012281	zgc:65851 [Source:ZFIN;Acc:ZDB-GENE-030131- 9669]	0.00111846	0.78561	0.72256	7.92142	7.09586
psme1	ENSDARG00000002165	proteasome (prosome, macropain) activator subunit 1 (PA28 alpha) [Source:ZFIN;Acc:ZDB-GENE-991110- 17]	0.00112152	1.18664	0.989434	5.04876	3.80121
apoea	ENSDARG00000102004	apolipoprotein Ea [Source:ZFIN;Acc:ZDB-GENE- 010724-18]	0.00113091	0.610867	0.580217	8.24579	7.56096
grhl3	ENSDARG00000078552	grainyhead-like 3 [Source:ZFIN;Acc:ZDB-GENE- 030131-9854]	0.00113498	1.20509	0.999232	5.5626	4.24098
slc38a2	ENSDARG00000045886	solute carrier family 38, member 2 [Source:ZFIN;Acc:ZDB-GENE-030131-9659]	0.00113597	0.865941	0.782753	6.31331	5.38978
spata18	ENSDARG00000052343	spermatogenesis associated 18 [Source:ZFIN;Acc:ZDB-GENE-050522-306]	0.00114204	2.24666	1.29418	4.21582	2.31882
arih2	ENSDARG00000012848	ariadne homolog 2 (Drosophila) [Source:ZFIN;Acc:ZDB-GENE-040426-2158]	0.00115345	0.782067	0.719566	6.77	5.92775
taf15	ENSDARG00000070019	TAF15 RNA polymerase II, TATA box binding protein (TBP)-associated factor [Source:ZFIN;Acc:ZDB-GENE- 061215-102]	0.00115724	0.67753	0.636042	7.39505	6.67627
TMEM30B	ENSDARG00000054122	transmembrane protein 30B [Source:HGNC Symbol;Acc:HGNC:27254]	0.00116291	1.27887	1.03728	4.94627	3.59187
cox6c	ENSDARG00000038577	cytochrome c oxidase subunit VIc [Source:ZFIN;Acc:ZDB-GENE-040724-95]	0.00116765	1.20273	0.99721	5.14002	3.91671
acadm	ENSDARG00000038900	acyl-CoA dehydrogenase, C-4 to C-12 straight chain [Source:ZFIN;Acc:ZDB-GENE-040426-1945]	0.00118332	0.672564	0.631806	7.07068	6.33036
si:ch211-218o21.4	ENSDARG00000079869	si:ch211-218o21.4 [Source:ZFIN;Acc:ZDB-GENE- 081104-178]	0.00118468	2.50049	1.30807	3.1462	0.546967
cyc1	ENSDARG00000038075	cytochrome c-1 [Source:ZFIN;Acc:ZDB-GENE- 031105-2]	0.00119684	0.72666	0.675697	6.73429	5.93483
zgc:77752	ENSDARG00000042387	zgc:77752 [Source:ZFIN;Acc:ZDB-GENE-040426- 1867]	0.00121394	2.65915	1.3019	3.12635	0.265017
SNORD30	ENSDARG00000080156	Small nucleolar RNA SNORD30 [Source:RFAM;Acc:RF00088]	0.0012611	2.45416	1.296	3.58343	1.40772
calm2a	ENSDARG00000031427	calmodulin 2a (phosphorylase kinase, delta) [Source:ZFIN;Acc:ZDB-GENE-030804-3]	0.0012635	0.58483	0.557402	7.88536	7.23016
ift52	ENSDARG00000045025	intraflagellar transport 52 homolog (Chlamydomonas) [Source:ZFIN;Acc:ZDB-GENE-040614-3]	0.00128389	1.2709	1.03061	4.8456	3.52808
tob1b	ENSDARG00000021372	transducer of ERBB2, 1b [Source:ZFIN;Acc:ZDB- GENE-040426-2151]	0.00129339	0.747619	0.691811	6.7194	5.8903
tax1bp1b	ENSDARG00000056856	Tax1 (human T-cell leukemia virus type I) binding protein 1b [Source:ZFIN;Acc:ZDB-GENE-030131-2872]	0.00129772	0.602874	0.572811	8.43398	7.80001
hnrnpaba	ENSDARG00000007960	heterogeneous nuclear ribonucleoprotein A/Ba [Source:ZFIN;Acc:ZDB-GENE-030131-185]	0.00130525	0.514107	0.495189	9.2813	8.69483
tmem33	ENSDARG00000041332	transmembrane protein 33 [Source:ZFIN;Acc:ZDB-GENE-030131-5425]	0.00130973	1.26577	1.02735	5.0912	3.73026
hypk	ENSDARG00000059725	huntingtin interacting protein K [Source:ZFIN;Acc:ZDB-GENE-080515-6]	0.00130973	0.928171	0.825317	5.95255	4.93141
safb	ENSDARG00000020467	scaffold attachment factor B [Source:ZFIN;Acc:ZDB-GENE-030131-698]	0.00131869	0.555591	0.531821	8.45467	7.8306
MAF1	ENSDARG00000036489	MAF1 homolog (S. cerevisiae) [Source:HGNC Symbol;Acc:HGNC:24966]	0.0013355	0.914328	0.815415	6.5646	5.5815
arf2	ENSDARG00000014763	ADP-ribosylation factor 2 [Source:ZFIN;Acc:ZDB-GENE-040122-4]	0.00133863	0.687096	0.643046	7.48655	6.74972
rd3	ENSDARG00000031600	retinal degeneration 3 [Source:ZFIN;Acc:ZDB- GENE-040724-103]	0.00134165	1.5793	1.15852	4.21934	2.52492
zgc:123284	ENSDARG00000102720	zgc:123284 [Source:ZFIN;Acc:ZDB-GENE-051113- 92]	0.0013424	3.47844	1.18396	2.48962	0.456681
C9H3orf70 (1 of 2)	ENSDARG00000061664	chromosome 3 open reading frame 70 [Source:HGNC Symbol;Acc:HGNC:33731]	0.00134375	2.318	1.29013	3.50583	1.03088
ywhaqa	ENSDARG00000042539	tyrosine 3-monooxygenase/tryptophan 5- monooxygenase activation protein, theta polypeptide a [Source:ZFIN;Acc:ZDB-GENE-040122-5]	0.0013495	0.587238	0.559219	7.78504	7.12551
h3f3b.1	ENSDARG00000045248	H3 histone, family 3B.1 [Source:ZFIN;Acc:ZDB- GENE-050417-65]	0.00135476	0.764842	0.704889	6.49535	5.65563
armc4	ENSDARG00000055128	armadillo repeat containing 4 [Source:ZFIN;Acc:ZDB-GENE-100316-7]	0.00135706	1.79205	1.21817	4.26541	2.53628
rpgra	ENSDARG00000056617	retinitis pigmentosa GTPase regulator a [Source:ZFIN;Acc:ZDB-GENE-070912-423]	0.00136566	1.84134	1.22886	4.41348	2.45574
tpd52l1	ENSDARG00000042548	tumor protein D52-like 1 [Source:ZFIN;Acc:ZDB-GENE-050522-121]	0.00137505	1.22211	1.00351	4.91422	3.61282
arrdc3b	ENSDARG00000036028	arrestin domain containing 3b [Source:ZFIN;Acc:ZDB-GENE-040912-182]	0.00138258	1.03829	0.897142	6.03961	4.92467
ckbb	ENSDARG00000043257	creatine kinase, brain b [Source:ZFIN;Acc:ZDB-GENE-020103-2]	0.00138258	0.766001	0.705611	9.66534	8.82308
myo3b	ENSDARG00000006892	myosin IIIB [Source:ZFIN;Acc:ZDB-GENE-070706- 2]	0.00138718	0.877458	0.78881	5.97208	5.03063
pno1	ENSDARG00000008502	partner of NOB1 homolog (S. cerevisiae) [Source:ZFIN;Acc:ZDB-GENE-040426-1419]	0.00141639	0.717693	0.66739	6.98735	6.24384
ttll6	ENSDARG00000054023	tubulin tyrosine ligase-like family, member 6 [Source:ZFIN;Acc:ZDB-GENE-080107-1]	0.00142799	1.75157	1.20604	4.05238	2.24212
ift88	ENSDARG00000027234	intraflagellar transport 88 homolog [Source:ZFIN;Acc:ZDB-GENE-030131-574]	0.00142896	0.924791	0.821771	5.89538	4.89982
MKRN2OS (2 of 2)	ENSDARG00000100728	MKRN2 opposite strand [Source:HGNC Symbol;Acc:HGNC:40375]	0.00142918	3.00023	1.25396	3.13595	1.28245
st7l	ENSDARG00000032603	suppression of tumorigenicity 7 like [Source:ZFIN;Acc:ZDB-GENE-080219-43]	0.00143689	1.44826	1.10694	4.49021	2.98649
grxcr1	ENSDARG00000069865	glutaredoxin, cysteine rich 1 [Source:ZFIN;Acc:ZDB-GENE-070424-166]	0.00143689	7.49358	0.739762	1.10685	-2.99676
SERINC4	ENSDARG00000044815	serine incorporator 4 [Source:HGNC Symbol;Acc:HGNC:32237]	0.00143799	2.08886	1.26669	3.98575	2.22755
CCDC181	ENSDARG00000062021	coiled-coil domain containing 181 [Source:HGNC Symbol;Acc:HGNC:28051]	0.00144566	2.00049	1.25559	3.59842	1.65284
flj11011l	ENSDARG00000045360	hypothetical protein FLJ11011-like (H. sapiens) [Source:ZFIN;Acc:ZDB-GENE-050113-1]	0.00144729	1.35074	1.06475	5.03307	3.62124
txnl1	ENSDARG00000011921	thioredoxin-like 1 [Source:ZFIN;Acc:ZDB-GENE- 040426-701]	0.00145165	0.885627	0.794078	5.89095	4.93159
sat1a.1	ENSDARG00000035652	spermidine/spermine N1-acetyltransferase 1a, duplicate 1 [Source:ZFIN;Acc:ZDB-GENE-050913-41]	0.00145165	0.594634	0.565262	7.82063	7.15253
VMA21	ENSDARG00000093945	VMA21 vacuolar H+-ATPase homolog (S. cerevisiae) [Source:HGNC Symbol;Acc:HGNC:22082]	0.0014601	1.16609	0.971565	5.16721	3.9458
ppa1b	ENSDARG00000030441	pyrophosphatase (inorganic) 1b [Source:ZFIN;Acc:ZDB-GENE-050417-375]	0.00146486	0.801229	0.732063	6.46418	5.58878
pet100	ENSDARG00000098017	PET100 homolog (S. cerevisiae) [Source:ZFIN;Acc:ZDB-GENE-131121-608]	0.00146549	2.23616	1.27909	3.35553	1.14246
SLC7A11	ENSDARG00000071384	solute carrier family 7 (anionic amino acid transporter light chain, xc- system), member 11 [Source:HGNC Symbol;Acc:HGNC:11059]	0.00147318	2.13953	1.26865	3.868	1.69401
hnrnpa0b	ENSDARG00000036162	heterogeneous nuclear ribonucleoprotein A0b [Source:ZFIN;Acc:ZDB-GENE-030131-6154]	0.0014859	0.673258	0.631081	7.06127	6.32289
capgb	ENSDARG00000099672	capping protein (actin filament), gelsolin- like b [Source:ZFIN;Acc:ZDB-GENE-030131-8541]	0.00148764	0.820684	0.74653	6.73076	5.85135
ssr2	ENSDARG00000005230	signal sequence receptor, beta [Source:ZFIN;Acc:ZDB-GENE-010413-1]	0.00150825	0.812819	0.740497	6.24586	5.36095
casq1a	ENSDARG00000038716	calsequestrin 1a [Source:ZFIN;Acc:ZDB-GENE- 040801-139]	0.00151539	0.738745	0.683544	6.71331	5.89268
fam133b	ENSDARG00000013863	family with sequence similarity 133, member B [Source:ZFIN;Acc:ZDB-GENE-060503-229]	0.001579	0.848054	0.766048	6.8176	5.86944
eif1axb	ENSDARG00000057912	eukaryotic translation initiation factor 1A, X-linked, b [Source:ZFIN;Acc:ZDB-GENE-030131-1319]	0.00159721	0.798771	0.729409	6.44299	5.57103
apba1b	ENSDARG00000074328	amyloid beta (A4) precursor protein-binding, family A, member 1b [Source:ZFIN;Acc:ZDB-GENE-070925-3]	0.00160731	0.906729	0.807682	6.01654	5.06027
myo6b	ENSDARG00000042141	myosin VIb [Source:ZFIN;Acc:ZDB-GENE-030318- 3]	0.00162595	0.80331	0.732665	7.21819	6.335
mrpl47	ENSDARG00000075743	mitochondrial ribosomal protein L47 [Source:ZFIN;Acc:ZDB-GENE-030219-177]	0.00163284	1.10183	0.932518	5.21192	4.04585
rpl21	ENSDARG00000010516	ribosomal protein L21 [Source:ZFIN;Acc:ZDB- GENE-030131-8512]	0.00164766	0.546398	0.523029	9.20544	8.57458
tspo	ENSDARG00000026655	translocator protein [Source:ZFIN;Acc:ZDB- GENE-041010-125]	0.00167901	1.17912	0.975433	5.15406	3.93748
atpv0e2	ENSDARG00000059057	ATPase, H+ transporting V0 subunit e2 [Source:ZFIN;Acc:ZDB-GENE-050522-135]	0.0016926	1.57622	1.14643	4.34259	2.71295
ppp1r13ba	ENSDARG00000004377	protein phosphatase 1, regulatory subunit 13Ba [Source:ZFIN;Acc:ZDB-GENE-030131-9805]	0.00170174	0.819984	0.744719	6.50612	5.60757
kcnd1	ENSDARG00000074746	potassium voltage-gated channel, Shal- related subfamily, member 1 [Source:ZFIN;Acc:ZDB-GENE- 081105-40]	0.00170227	1.28383	1.02849	5.19332	3.89289
cox7a3	ENSDARG00000054907	cytochrome c oxidase subunit VIIa polypeptide 3 [Source:ZFIN;Acc:ZDB-GENE-030131-7691]	0.00171522	1.1789	0.974771	5.31291	4.06788
dhx32b	ENSDARG00000079029	DEAH (Asp-Glu-Ala-His) box polypeptide 32b [Source:ZFIN;Acc:ZDB-GENE-130613-5]	0.00172304	1.17841	0.974352	5.1081	3.8689
ppp1caa	ENSDARG00000003486	protein phosphatase 1, catalytic subunit, alpha isozyme a [Source:ZFIN;Acc:ZDB-GENE-040516-3]	0.0017435	0.69173	0.645137	6.94405	6.18229
hexb	ENSDARG00000034368	hexosaminidase B (beta polypeptide) [Source:ZFIN;Acc:ZDB-GENE-030131-2333]	0.00175346	0.8041	0.73254	6.35181	5.49038
got1l1	ENSDARG00000053644	glutamic-oxaloacetic transaminase 1-like 1 [Source:ZFIN;Acc:ZDB-GENE-060929-556]	0.0017536	2.73868	1.26088	2.93764	-0.00812405
mospd1	ENSDARG00000028614	motile sperm domain containing 1 [Source:ZFIN;Acc:ZDB-GENE-040426-2691]	0.00175458	1.40354	1.08099	4.5528	3.11539
tmem132a	ENSDARG00000098263	transmembrane protein 132A [Source:ZFIN;Acc:ZDB-GENE-140106-237]	0.00175535	3.06736	1.23314	2.70862	-0.48558
dcaf7	ENSDARG00000054355	ddb1 and cul4 associated factor 7 [Source:ZFIN;Acc:ZDB-GENE-030131-9511]	0.00175535	0.743511	0.686186	6.95814	6.12997
gas8	ENSDARG00000101431	growth arrest-specific 8 [Source:ZFIN;Acc:ZDB-GENE-030131-1980]	0.00176353	1.10035	0.929914	5.29341	4.11388
impg1b	ENSDARG00000074839	interphotoreceptor matrix proteoglycan 1b [Source:ZFIN;Acc:ZDB-GENE-101007-1]	0.00177332	1.0809	0.918334	5.7012	4.57925
kcnip1b	ENSDARG00000034808	Kv channel interacting protein 1 b [Source:ZFIN;Acc:ZDB-GENE-041212-57]	0.00177885	1.16277	0.965005	5.01056	3.77251
timm13	ENSDARG00000058297	translocase of inner mitochondrial membrane 13 homolog (yeast) [Source:ZFIN;Acc:ZDB-GENE-040718-167]	0.00178905	0.986867	0.859855	5.582	4.54052
tnni2b.1	ENSDARG00000035958	troponin I type 2b (skeletal, fast), tandem duplicate 1 [Source:ZFIN;Acc:ZDB-GENE-050417-49]	0.00179593	0.755955	0.695651	6.67379	5.84584
drc1	ENSDARG00000042182	dynein regulatory complex subunit 1 homolog (Chlamydomonas) [Source:ZFIN;Acc:ZDB-GENE-041001-218]	0.00179858	1.72713	1.18687	3.92351	2.24161
meaf6	ENSDARG00000101216	MYST/Esa1-associated factor 6 [Source:ZFIN;Acc:ZDB-GENE-040808-12]	0.00179859	0.890184	0.794604	6.00576	4.97212
rps19	ENSDARG00000030602	ribosomal protein S19 [Source:ZFIN;Acc:ZDB- GENE-040426-1716]	0.00181197	0.767	0.704069	7.55924	6.77799
g6pd	ENSDARG00000071065	glucose-6-phosphate dehydrogenase [Source:ZFIN;Acc:ZDB-GENE-070508-4]	0.00181197	0.723705	0.670352	6.81831	6.03007
casp3b	ENSDARG00000055045	caspase 3, apoptosis-related cysteine peptidase b [Source:ZFIN;Acc:ZDB-GENE-070607-1]	0.00183374	1.54345	1.13177	4.22427	2.62214
rab3aa	ENSDARG00000056347	RAB3A, member RAS oncogene family, a [Source:ZFIN;Acc:ZDB-GENE-040801-2]	0.00184974	1.08361	0.919056	5.20342	4.05385
per2	ENSDARG00000034503	period circadian clock 2 [Source:ZFIN;Acc:ZDB-GENE-011220-2]	0.00186246	1.02113	0.880911	6.12845	5.03209
chst1	ENSDARG00000088593	carbohydrate (keratan sulfate Gal-6) sulfotransferase 1 [Source:ZFIN;Acc:ZDB-GENE-040801-21]	0.00186513	1.57197	1.14053	4.17674	2.60092
waslb	ENSDARG00000006283	Wiskott-Aldrich syndrome-like b [Source:ZFIN;Acc:ZDB-GENE-040426-718]	0.0018671	0.853335	0.767983	5.95464	5.06347
zgc:73075	ENSDARG00000009637	zgc:73075 [Source:ZFIN;Acc:ZDB-GENE-040426- 1661]	0.0018671	0.753858	0.693681	7.60169	6.76988
GCA	ENSDARG00000020187	grancalcin, EF-hand calcium binding protein [Source:HGNC Symbol;Acc:HGNC:15990]	0.00186787	0.71726	0.665038	6.83011	6.04801
rp1l1a	ENSDARG00000089458	retinitis pigmentosa 1-like 1a [Source:ZFIN;Acc:ZDB-GENE-120711-1]	0.0018982	0.983213	0.856466	5.55238	4.52003
SNORD58	ENSDARG00000081856	Small nucleolar RNA SNORD58 [Source:RFAM;Acc:RF00151]	0.00191613	0.571384	0.544163	8.2994	7.65479
v2rx3	ENSDARG00000061873	vomeronasal 2 receptor, x3 [Source:ZFIN;Acc:ZDB-GENE-050419-262]	0.00192822	7.24864	0.759251	1.20862	-3.64877
trpm2	ENSDARG00000095696	transient receptor potential cation channel, subfamily M, member 2 [Source:ZFIN;Acc:ZDB-GENE-061214-4]	0.00192985	1.5777	1.14032	4.18816	2.52132
cdc42	ENSDARG00000044573	cell division cycle 42 [Source:ZFIN;Acc:ZDB- GENE-030131-8783]	0.00195296	0.833595	0.753134	6.31489	5.40727
cacna2d4a	ENSDARG00000103810	calcium channel, voltage-dependent, alpha 2/delta subunit 4a [Source:ZFIN;Acc:ZDB-GENE-041210-213]	0.00196283	3.51535	1.16823	2.32144	-1.04332
SNORD35	ENSDARG00000083504	Small nucleolar RNA SNORD35 [Source:RFAM;Acc:RF00211]	0.00196636	0.664066	0.621875	7.53673	6.80155
UNC13B (2 of 2)	ENSDARG00000099113	unc-13 homolog B (C. elegans) [Source:HGNC Symbol;Acc:HGNC:12566]	0.00197656	0.968699	0.846373	7.14244	6.17606
TESK1 (2 of 2)	ENSDARG00000079281	testis-specific kinase 1 [Source:HGNC Symbol;Acc:HGNC:11731]	0.00201918	1.11595	0.935811	5.11985	3.95757
zgc:101731	ENSDARG00000040965	zgc:101731 [Source:ZFIN;Acc:ZDB-GENE-040912- 57]	0.00202621	2.03046	1.23397	3.56726	1.50041
zgc:110045	ENSDARG00000057141	zgc:110045 [Source:ZFIN;Acc:ZDB-GENE-050706- 149]	0.00204519	0.670045	0.626512	6.88043	6.12954
SNORA21	ENSDARG00000080533	Small nucleolar RNA SNORA21 [Source:RFAM;Acc:RF00412]	0.00205245	0.943988	0.829512	5.8131	4.80273
si:dkey-145p14.6	ENSDARG00000095219	si:dkey-145p14.6 [Source:ZFIN;Acc:ZDB-GENE- 070912-370]	0.00205317	2.45566	1.24961	3.44063	1.48033
ankrd24	ENSDARG00000062103	ankyrin repeat domain 24 [Source:ZFIN;Acc:ZDB-GENE-050208-747]	0.00207116	1.22236	0.992205	4.83763	3.55159
bik	ENSDARG00000045549	BCL2-interacting killer (apoptosis-inducing) [Source:ZFIN;Acc:ZDB-GENE-041210-181]	0.00209998	2.6529	1.24164	3.20704	1.17649
tmem53	ENSDARG00000038789	transmembrane protein 53 [Source:ZFIN;Acc:ZDB-GENE-040718-384]	0.00209998	2.00444	1.22757	3.64009	1.6726
CABZ01088567.1	ENSDARG00000103065	No description	0.00211267	1.93731	1.21806	3.67174	1.68201
fgf11b	ENSDARG00000043907	fibroblast growth factor 11b [Source:ZFIN;Acc:ZDB-GENE-100316-2]	0.00211267	1.26526	1.01265	5.53829	4.22924
tex2l	ENSDARG00000078132	testis expressed 2, like [Source:ZFIN;Acc:ZDB-GENE-121214-164]	0.00214954	1.81545	1.19556	3.95048	2.17455
pcdh15a	ENSDARG00000098257	protocadherin-related 15a [Source:ZFIN;Acc:ZDB-GENE-030616-3]	0.00215134	1.10654	0.928881	6.08084	4.96019
pkib	ENSDARG00000053110	protein kinase (cAMP-dependent, catalytic) inhibitor beta [Source:ZFIN;Acc:ZDB-GENE-041014-312]	0.00216148	1.6569	1.15815	4.04207	2.34364
ptpn20	ENSDARG00000075459	protein tyrosine phosphatase, non-receptor type 20 [Source:ZFIN;Acc:ZDB-GENE-090313-90]	0.00216148	1.10041	0.925306	5.29787	4.15463
spa17	ENSDARG00000069361	sperm autoantigenic protein 17 [Source:ZFIN;Acc:ZDB-GENE-061027-337]	0.00216408	1.17189	0.964762	4.95455	3.73627
cited4a	ENSDARG00000035990	Cbp/p300-interacting transactivator, with Glu/Asp-rich carboxy-terminal domain, 4a [Source:ZFIN;Acc:ZDB-GENE-030131-7661]	0.00216564	0.956092	0.83659	5.78475	4.74822
si:dkeyp-73d8.9	ENSDARG00000076043	si:dkeyp-73d8.9 [Source:ZFIN;Acc:ZDB-GENE- 070912-685]	0.00217328	2.08182	1.23408	3.47227	1.26404
ccdc47	ENSDARG00000054362	coiled-coil domain containing 47 [Source:ZFIN;Acc:ZDB-GENE-040912-15]	0.00217328	0.635718	0.597941	7.28845	6.57548
cyp2p10	ENSDARG00000042990	cytochrome P450, family 2, subfamily P, polypeptide 10 [Source:ZFIN;Acc:ZDB-GENE-040120-1]	0.00219756	1.68137	1.16339	4.03009	2.30226
wdr78	ENSDARG00000044400	WD repeat domain 78 [Source:ZFIN;Acc:ZDB- GENE-050522-322]	0.00221152	2.8288	1.22282	2.88832	0.232952
CU469384.1	ENSDARG00000103312	No description	0.00223422	1.74829	1.17852	4.12484	2.35993
rassf6	ENSDARG00000000804	Ras association (RalGDS/AF-6) domain family 6 [Source:ZFIN;Acc:ZDB-GENE-030616-513]	0.00223809	1.22968	0.993408	5.17022	3.8467
mdkb	ENSDARG00000020708	midkine b [Source:ZFIN;Acc:ZDB-GENE-010131- 6]	0.00223988	0.743892	0.684405	6.65028	5.83423
mbd2	ENSDARG00000075952	methyl-CpG binding domain protein 2 [Source:ZFIN;Acc:ZDB-GENE-030131-9049]	0.00226126	1.26898	1.01214	4.82029	3.45856
efhc1	ENSDARG00000009743	EF-hand domain (C-terminal) containing 1 [Source:ZFIN;Acc:ZDB-GENE-040426-1300]	0.00226414	2.47289	1.24658	3.00457	0.808748
rgs8	ENSDARG00000070037	regulator of G-protein signaling 8 [Source:ZFIN;Acc:ZDB-GENE-040718-264]	0.00227168	1.20809	0.982217	4.77261	3.50165
ZFP36	ENSDARG00000103720	ZFP36 ring finger protein [Source:HGNC Symbol;Acc:HGNC:12862]	0.00228246	0.961632	0.839345	5.92181	4.88875
cox17	ENSDARG00000069920	COX17 cytochrome c oxidase copper chaperone [Source:ZFIN;Acc:ZDB-GENE-040912-91]	0.00228277	1.19347	0.974465	5.11512	3.83413
atp5f1	ENSDARG00000011553	ATP synthase, H+ transporting, mitochondrial Fo complex, subunit B1 [Source:ZFIN;Acc:ZDB-GENE-041010- 33]	0.00229823	0.530871	0.508283	8.62287	8.01921
ube2w	ENSDARG00000044923	ubiquitin-conjugating enzyme E2W (putative) [Source:ZFIN;Acc:ZDB-GENE-050506-94]	0.00230242	1.33218	1.04032	4.77133	3.38318
lsm12b	ENSDARG00000045940	LSM12 homolog b (S. cerevisiae) [Source:ZFIN;Acc:ZDB-GENE-040426-2164]	0.00230408	0.754112	0.692009	6.32301	5.52071
oaz1a	ENSDARG00000071403	ornithine decarboxylase antizyme 1a [Source:ZFIN;Acc:ZDB-GENE-020731-4]	0.00231918	0.650556	0.609783	7.16646	6.45701
mhc1zba	ENSDARG00000036588	major histocompatibility complex class I ZBA [Source:ZFIN;Acc:ZDB-GENE-040426-2149]	0.00232017	0.761361	0.697472	6.33847	5.50434
ndufs2	ENSDARG00000007526	NADH dehydrogenase (ubiquinone) Fe-S protein 2 [Source:ZFIN;Acc:ZDB-GENE-050522-273]	0.00235135	0.642171	0.602809	7.44238	6.73795
asap1b	ENSDARG00000039729	ArfGAP with SH3 domain, ankyrin repeat and PH domain 1b [Source:ZFIN;Acc:ZDB-GENE-091112-16]	0.0023926	0.779094	0.710603	7.1437	6.28629
wasf3a	ENSDARG00000059466	WAS protein family, member 3a [Source:ZFIN;Acc:ZDB-GENE-060531-55]	0.00240091	1.37511	1.05695	4.56382	3.15284
snrpe	ENSDARG00000033175	small nuclear ribonucleoprotein polypeptide E [Source:ZFIN;Acc:ZDB-GENE-040426-1112]	0.00240853	1.27658	1.01359	4.72586	3.38826
SNORD35	ENSDARG00000083504	Small nucleolar RNA SNORD35 [Source:RFAM;Acc:RF00211]	0.00244864	0.620316	0.584474	7.70754	7.01037
serf2	ENSDARG00000074340	small EDRK-rich factor 2 [Source:ZFIN;Acc:ZDB-GENE-041108-1]	0.00245984	0.799035	0.725164	6.16411	5.29278
tmed10	ENSDARG00000041391	transmembrane emp24-like trafficking protein 10 (yeast) [Source:ZFIN;Acc:ZDB-GENE-030131-4915]	0.00246739	0.565834	0.538317	7.76741	7.12495
u2af1	ENSDARG00000015325	U2 small nuclear RNA auxiliary factor 1 [Source:ZFIN;Acc:ZDB-GENE-020419-1]	0.00248075	0.648196	0.607409	7.00953	6.29348
unc119a	ENSDARG00000034453	unc-119 homolog a (C. elegans) [Source:ZFIN;Acc:ZDB-GENE-090930-2]	0.0024917	1.17525	0.962463	4.81831	3.58514
HYLS1	ENSDARG00000098623	hydrolethalus syndrome 1 [Source:HGNC Symbol;Acc:HGNC:26558]	0.00250496	1.00091	0.86254	5.33657	4.29108
zgc:100868	ENSDARG00000004748	zgc:100868 [Source:ZFIN;Acc:ZDB-GENE-040801- 33]	0.00250622	0.698773	0.648113	6.95279	6.18503
tspan3a	ENSDARG00000034753	tetraspanin 3a [Source:ZFIN;Acc:ZDB-GENE- 030131-7787]	0.00251163	0.854707	0.765168	5.82196	4.89478
zgc:173575	ENSDARG00000078281	zgc:173575 [Source:ZFIN;Acc:ZDB-GENE-080218- 25]	0.00252212	0.830015	0.747453	6.44397	5.56336
hars	ENSDARG00000003693	histidyl-tRNA synthetase [Source:ZFIN;Acc:ZDB-GENE-040912-152]	0.00252249	0.854616	0.765039	6.23268	5.32773
acbd7	ENSDARG00000094730	acyl-CoA binding domain containing 7 [Source:ZFIN;Acc:ZDB-GENE-050913-108]	0.00253403	1.22222	0.985654	5.13288	3.8751
pon1	ENSDARG00000032496	paraoxonase 1 [Source:ZFIN;Acc:ZDB-GENE- 040912-6]	0.00253763	1.21645	0.982786	4.79421	3.51995
eif4ea	ENSDARG00000077012	eukaryotic translation initiation factor 4ea [Source:ZFIN;Acc:ZDB-GENE-040413-1]	0.00259832	1.21249	0.979951	5.01976	3.70859
eif5a	ENSDARG00000017235	eukaryotic translation initiation factor 5A [Source:ZFIN;Acc:ZDB-GENE-040426-2229]	0.00262969	0.681315	0.633819	7.53581	6.81212
si:dkey-57a22.12	ENSDARG00000093594	si:dkey-57a22.12 [Source:ZFIN;Acc:ZDB-GENE- 081104-424]	0.00265358	2.77833	1.20587	2.7646	0.0881985
ndufb5	ENSDARG00000070824	NADH dehydrogenase (ubiquinone) 1 beta subcomplex 5 [Source:ZFIN;Acc:ZDB-GENE-011010-1]	0.00266281	0.998199	0.859598	5.38769	4.28757
pxdc1a	ENSDARG00000055177	PX domain containing 1a [Source:ZFIN;Acc:ZDB- GENE-070912-381]	0.00270808	1.9407	1.19927	3.62905	1.67093
vsig8a	ENSDARG00000054050	V-set and immunoglobulin domain containing 8a [Source:ZFIN;Acc:ZDB-GENE-050417-338]	0.00270808	1.60066	1.12901	4.13345	2.425
grtp1a	ENSDARG00000029936	growth hormone regulated TBC protein 1a [Source:ZFIN;Acc:ZDB-GENE-040426-2733]	0.00271292	1.44259	1.07757	4.44864	3.10046
brms1la	ENSDARG00000006235	breast cancer metastasis-suppressor 1-like a [Source:ZFIN;Acc:ZDB-GENE-050913-49]	0.00272727	0.81078	0.732574	6.15923	5.33127
si:dkey-222f2.1	ENSDARG00000043242	si:dkey-222f2.1 [Source:ZFIN;Acc:ZDB-GENE- 050208-726]	0.0027936	0.697231	0.646037	6.78129	6.01782
sema7a	ENSDARG00000078707	semaphorin 7A [Source:ZFIN;Acc:ZDB-GENE- 030131-3633]	0.00281592	1.26737	1.0037	5.13974	3.86165
ccdc12	ENSDARG00000023003	coiled-coil domain containing 12 [Source:ZFIN;Acc:ZDB-GENE-040801-108]	0.00282141	1.35026	1.03996	4.63957	3.33624
SNORD35	ENSDARG00000083504	Small nucleolar RNA SNORD35 [Source:RFAM;Acc:RF00211]	0.00285169	0.62129	0.584403	7.67367	6.97638
arhgef7a	ENSDARG00000006299	Rho guanine nucleotide exchange factor (GEF) 7a [Source:ZFIN;Acc:ZDB-GENE-060322-11]	0.00286631	0.854511	0.763276	6.19904	5.29395
rrp15	ENSDARG00000013478	ribosomal RNA processing 15 homolog (S. cerevisiae) [Source:ZFIN;Acc:ZDB-GENE-030131-5261]	0.00287328	1.21971	0.9805	4.75324	3.46127
pbxip1b	ENSDARG00000011824	pre-B-cell leukemia homeobox interacting protein 1b [Source:ZFIN;Acc:ZDB-GENE-070112-2032]	0.0028966	0.822094	0.740061	7.10687	6.20434
nudc	ENSDARG00000104837	nudC nuclear distribution protein [Source:ZFIN;Acc:ZDB-GENE-040426-899]	0.00289899	0.744072	0.682129	6.77713	5.95172
fosl1a	ENSDARG00000015355	FOS-like antigen 1a [Source:ZFIN;Acc:ZDB- GENE-061207-7]	0.0029384	3.96479	0.90519	4.89424	1.26404
rx2	ENSDARG00000040321	retinal homeobox gene 2 [Source:ZFIN;Acc:ZDB- GENE-990415-237]	0.00294755	1.13709	0.93766	5.02872	3.82699
MRPS12	ENSDARG00000089836	mitochondrial ribosomal protein S12 [Source:HGNC Symbol;Acc:HGNC:10380]	0.00295091	1.42951	1.06924	4.2568	2.74803
ODF3L2 (1 of 2)	ENSDARG00000014209	outer dense fiber of sperm tails 3-like 2 [Source:HGNC Symbol;Acc:HGNC:26841]	0.00295653	2.36889	1.21738	3.10082	0.615237
si:ch211-113e8.11	ENSDARG00000076585	si:ch211-113e8.11 [Source:ZFIN;Acc:ZDB-GENE- 090313-12]	0.0029577	1.33834	1.03332	4.59501	3.39698
sypb	ENSDARG00000002230	synaptophysin b [Source:ZFIN;Acc:ZDB-GENE- 040718-205]	0.00296998	0.669189	0.623242	6.77031	6.03076
asph	ENSDARG00000055945	aspartate beta-hydroxylase [Source:ZFIN;Acc:ZDB-GENE-031112-5]	0.00297355	0.69012	0.639921	8.04756	7.28845
tsga10	ENSDARG00000052512	testis specific, 10 [Source:ZFIN;Acc:ZDB- GENE-061013-482]	0.00298322	1.96568	1.19602	3.42539	1.43378
ctsd	ENSDARG00000057698	cathepsin D [Source:ZFIN;Acc:ZDB-GENE-010131- 8]	0.00298322	0.630459	0.591705	7.04645	6.33817
lgals2a	ENSDARG00000054942	lectin, galactoside-binding, soluble, 2a [Source:ZFIN;Acc:ZDB-GENE-050318-2]	0.00298744	1.08969	0.911225	5.00247	3.83856
si:ch211-152c2.3	ENSDARG00000045898	si:ch211-152c2.3 [Source:ZFIN;Acc:ZDB-GENE- 030131-9914]	0.00302471	1.40652	1.05944	4.34519	3.04414
ezh1	ENSDARG00000037894	enhancer of zeste 1 polycomb repressive complex 2 subunit [Source:ZFIN;Acc:ZDB-GENE-050114-1]	0.0030338	0.962701	0.83478	5.4368	4.3994
si:dkey-7j14.6	ENSDARG00000090552	si:dkey-7j14.6 [Source:ZFIN;Acc:ZDB-GENE- 030131-8466]	0.00304025	0.986753	0.849899	5.36195	4.30241
crip1	ENSDARG00000053858	cysteine-rich protein 1 [Source:ZFIN;Acc:ZDB- GENE-041111-1]	0.00304447	1.05104	0.888573	5.36171	4.25942
svopl	ENSDARG00000057983	SVOP-like [Source:ZFIN;Acc:ZDB-GENE-041114- 109]	0.00304631	1.16329	0.95029	5.04024	3.82446
rbp2b	ENSDARG00000093774	retinol binding protein 2b, cellular [Source:ZFIN;Acc:ZDB-GENE-040715-7]	0.0030532	1.49329	1.0898	4.3933	2.76404
si:dkey-23i12.5	ENSDARG00000103682	si:dkey-23i12.5 [Source:ZFIN;Acc:ZDB-GENE- 141222-32]	0.00306383	1.33475	1.03013	4.69865	3.37228
MPV17L	ENSDARG00000104457	MPV17 mitochondrial membrane protein-like [Source:HGNC Symbol;Acc:HGNC:26827]	0.00307707	2.11649	1.20673	3.3359	1.21846
si:ch211-195b15.8	ENSDARG00000094836	si:ch211-195b15.8 [Source:ZFIN;Acc:ZDB-GENE- 131127-627]	0.00308992	0.93633	0.817462	5.60627	4.59965
pdcb	ENSDARG00000017634	phosducin b [Source:ZFIN;Acc:ZDB-GENE-031023- 2]	0.00309896	0.818058	0.736293	6.25702	5.36046
cyp2aa11	ENSDARG00000103456	cytochrome P450, family 2, subfamily AA, polypeptide 11 [Source:ZFIN;Acc:ZDB-GENE-110114-3]	0.00310291	1.95666	1.19173	3.41483	1.40932
dusp4	ENSDARG00000044688	dual specificity phosphatase 4 [Source:ZFIN;Acc:ZDB-GENE-040426-709]	0.00313347	1.34895	1.0352	4.58722	3.15019
SNORA31	ENSDARG00000084532	Small nucleolar RNA SNORA31 [Source:RFAM;Acc:RF00322]	0.00314958	0.574259	0.544395	8.48422	7.84501
CABZ01075125.1	ENSDARG00000102972	No description	0.00316198	3.1302	1.15866	2.38832	-0.8358
cabp4	ENSDARG00000008866	calcium binding protein 4 [Source:ZFIN;Acc:ZDB-GENE-081104-291]	0.00319675	2.86943	1.18133	2.6168	-0.189409
cx43.4	ENSDARG00000007099	connexin 43.4 [Source:ZFIN;Acc:ZDB-GENE- 990415-38]	0.00319675	0.874301	0.775441	5.7733	4.84192
ELMO1 (1 of 2)	ENSDARG00000055400	engulfment and cell motility 1 [Source:HGNC Symbol;Acc:HGNC:16286]	0.00321406	1.0298	0.874873	5.71627	4.58445
mpc2	ENSDARG00000024478	mitochondrial pyruvate carrier 2 [Source:ZFIN;Acc:ZDB-GENE-030131-330]	0.00322525	0.925742	0.80979	5.7894	4.86836
bbs7	ENSDARG00000059911	Bardet-Biedl syndrome 7 [Source:ZFIN;Acc:ZDB- GENE-030219-90]	0.00326164	1.43792	1.06726	4.62888	3.10537
fkbp2	ENSDARG00000044540	FK506 binding protein 2 [Source:ZFIN;Acc:ZDB- GENE-040912-126]	0.00326164	1.0254	0.871864	5.46688	4.38877
sart1	ENSDARG00000005945	squamous cell carcinoma antigen recognised by T cells [Source:ZFIN;Acc:ZDB-GENE-040718-422]	0.00326473	0.721183	0.66341	7.7806	6.96105
calml4a	ENSDARG00000075800	calmodulin-like 4a [Source:ZFIN;Acc:ZDB-GENE- 081022-9]	0.00326621	1.42769	1.06354	4.51368	3.01068
cryba4	ENSDARG00000024548	crystallin, beta A4 [Source:ZFIN;Acc:ZDB- GENE-050522-143]	0.00333245	0.627229	0.588346	7.10303	6.40254
ak7a	ENSDARG00000019001	adenylate kinase 7a [Source:ZFIN;Acc:ZDB- GENE-040724-122]	0.00335238	1.29577	1.00998	4.69812	3.38256
grik1b	ENSDARG00000040627	glutamate receptor, ionotropic, kainate 1b [Source:ZFIN;Acc:ZDB-GENE-070821-1]	0.00337695	1.33756	1.02751	4.54302	3.12594
mhc1zaa	ENSDARG00000086877	No description	0.0033858	0.682415	0.632776	6.65565	5.90687
nexn	ENSDARG00000095868	Uncharacterized protein [Source:UniProtKB/TrEMBL;Acc:X1WFX1]	0.00340454	0.870314	0.771721	6.34477	5.38897
ube2v1	ENSDARG00000041875	ubiquitin-conjugating enzyme E2 variant 1 [Source:ZFIN;Acc:ZDB-GENE-051030-102]	0.00342131	0.996809	0.853645	5.27043	4.20955
si:busm1-234g15.3	ENSDARG00000098051	si:busm1-234g15.3 [Source:ZFIN;Acc:ZDB-GENE- 030616-402]	0.00342453	1.41564	1.05708	4.32948	2.84976
ciapin1	ENSDARG00000045733	cytokine induced apoptosis inhibitor 1 [Source:ZFIN;Acc:ZDB-GENE-040808-57]	0.00347536	1.30044	1.01063	4.85446	3.36485
ubxn1	ENSDARG00000090309	UBX domain protein 1 [Source:ZFIN;Acc:ZDB- GENE-030131-792]	0.00349611	0.882672	0.779745	5.75102	4.78774
psma2	ENSDARG00000040121	proteasome (prosome, macropain) subunit, alpha type, 2 [Source:ZFIN;Acc:ZDB-GENE-050522-479]	0.00350309	0.990754	0.849436	5.48473	4.41372
dnah12	ENSDARG00000059987	dynein, axonemal, heavy chain 12 [Source:ZFIN;Acc:ZDB-GENE-090311-9]	0.00350502	1.23817	0.982385	5.14357	3.81951
cfap45	ENSDARG00000068103	cilia and flagella associated protein 45 [Source:ZFIN;Acc:ZDB-GENE-070209-143]	0.00350998	1.3035	1.0115	4.57483	3.21846
si:ch1073-190k2.1	ENSDARG00000097973	si:ch1073-190k2.1 [Source:ZFIN;Acc:ZDB-GENE- 131127-449]	0.0035149	1.53792	1.09645	4.00531	2.39555
cox6b2	ENSDARG00000037860	cytochrome c oxidase subunit VIb polypeptide 2 [Source:ZFIN;Acc:ZDB-GENE-040426-1566]	0.00356273	0.761693	0.69332	6.46891	5.64515
rps24	ENSDARG00000039347	ribosomal protein S24 [Source:ZFIN;Acc:ZDB- GENE-040109-5]	0.00356273	0.529695	0.505584	8.07583	7.47237
si:ch211-136a13.2	ENSDARG00000092142	si:ch211-136a13.2 [Source:ZFIN;Acc:ZDB-GENE- 050419-257]	0.00359026	1.80103	1.15593	4.20654	2.33346
med31	ENSDARG00000008020	mediator complex subunit 31 [Source:ZFIN;Acc:ZDB-GENE-040718-114]	0.00359026	1.63185	1.12095	4.0647	2.35993
cnga3a	ENSDARG00000070726	cyclic nucleotide gated channel alpha 3a [Source:ZFIN;Acc:ZDB-GENE-090611-2]	0.00362168	0.836477	0.747312	6.19917	5.30408
ical1	ENSDARG00000057688	islet cell autoantigen 1-like [Source:ZFIN;Acc:ZDB-GENE-030910-4]	0.00365654	0.815294	0.732188	5.97404	5.11022
gtf2b	ENSDARG00000103578	general transcription factor IIB [Source:ZFIN;Acc:ZDB-GENE-030131-3544]	0.00367534	1.02309	0.867827	5.43172	4.41462
SUSD3 (2 of 2)	ENSDARG00000069607	sushi domain containing 3 [Source:HGNC Symbol;Acc:HGNC:28391]	0.00368212	1.64295	1.12243	3.94776	2.2601
kat5a	ENSDARG00000004587	K(lysine) acetyltransferase 5a [Source:ZFIN;Acc:ZDB-GENE-040718-57]	0.00369177	1.17681	0.951291	5.3367	4.16101
FIS1	ENSDARG00000095579	fission 1 (mitochondrial outer membrane) homolog (S. cerevisiae) [Source:HGNC Symbol;Acc:HGNC:21689]	0.00370795	1.62716	1.1173	4.28559	2.7002
gsk3ab	ENSDARG00000015681	glycogen synthase kinase 3 alpha b [Source:ZFIN;Acc:ZDB-GENE-990714-3]	0.00372739	0.635232	0.594161	6.93378	6.22935
sod2	ENSDARG00000042644	superoxide dismutase 2, mitochondrial [Source:ZFIN;Acc:ZDB-GENE-030131-7742]	0.0037417	0.751772	0.685379	6.22981	5.50014
zgc:165423	ENSDARG00000052905	zgc:165423 [Source:ZFIN;Acc:ZDB-GENE-070720- 11]	0.0037479	0.803576	0.723453	6.10375	5.24093
pcp4b	ENSDARG00000087386	Purkinje cell protein 4b [Source:ZFIN;Acc:ZDB-GENE-031118-117]	0.0037483	1.28996	1.0031	4.55638	3.38401
psmd14	ENSDARG00000063100	proteasome (prosome, macropain) 26S subunit, non-ATPase, 14 [Source:ZFIN;Acc:ZDB-GENE-070410-56]	0.0037483	0.746277	0.681185	6.2754	5.45777
zgc:101846	ENSDARG00000068995	zgc:101846 [Source:ZFIN;Acc:ZDB-GENE-041010- 42]	0.00375943	0.963867	0.831259	5.67353	4.73986
mapk15	ENSDARG00000100822	mitogen-activated protein kinase 15 [Source:ZFIN;Acc:ZDB-GENE-050522-307]	0.00376967	1.64729	1.12185	3.821	2.09007
cry1a	ENSDARG00000045768	cryptochrome circadian clock 1a [Source:ZFIN;Acc:ZDB-GENE-010426-2]	0.00379095	0.851371	0.757039	5.97979	5.05937
zdhhc9	ENSDARG00000060515	zinc finger, DHHC-type containing 9 [Source:ZFIN;Acc:ZDB-GENE-071004-8]	0.00379323	0.770117	0.698851	6.13682	5.30423
impg1a	ENSDARG00000077187	interphotoreceptor matrix proteoglycan 1a [Source:ZFIN;Acc:ZDB-GENE-070424-197]	0.00379983	0.816341	0.732382	6.219	5.35928
srp9	ENSDARG00000042851	signal recognition particle 9 [Source:ZFIN;Acc:ZDB-GENE-040426-1106]	0.00380666	1.24147	0.980984	4.6808	3.36831
cnih1	ENSDARG00000020311	cornichon family AMPA receptor auxiliary protein 1 [Source:ZFIN;Acc:ZDB-GENE-040426-1944]	0.00384359	0.862088	0.764182	6.01056	5.09668
wscd2	ENSDARG00000061819	WSC domain containing 2 [Source:ZFIN;Acc:ZDB- GENE-060526-124]	0.00384714	0.932567	0.810992	5.76132	4.77754
rpl27	ENSDARG00000015128	ribosomal protein L27 [Source:ZFIN;Acc:ZDB- GENE-030131-4343]	0.0038667	0.745947	0.680625	7.06122	6.26274
myoz1b	ENSDARG00000071445	myozenin 1b [Source:ZFIN;Acc:ZDB-GENE-040718- 146]	0.00387709	0.592773	0.558886	7.28527	6.61676
ush1c	ENSDARG00000051876	Usher syndrome 1C (autosomal recessive, severe) [Source:ZFIN;Acc:ZDB-GENE-060312-41]	0.00387749	0.846949	0.753638	5.88469	4.97996
tectb	ENSDARG00000045268	tectorin beta [Source:ZFIN;Acc:ZDB-GENE- 041212-16]	0.00389141	2.20875	1.18935	3.11734	1.54164
atp2b1a	ENSDARG00000012684	ATPase, Ca++ transporting, plasma membrane 1a [Source:ZFIN;Acc:ZDB-GENE-030925-29]	0.00389287	0.636803	0.59512	8.18852	7.49983
gmnn	ENSDARG00000035957	geminin, DNA replication inhibitor [Source:ZFIN;Acc:ZDB-GENE-030429-30]	0.00393332	1.26235	0.989264	6.46047	6.14333
selt1a	ENSDARG00000058354	selenoprotein T, 1a [Source:ZFIN;Acc:ZDB- GENE-030327-6]	0.00393679	0.959567	0.827634	5.47383	4.43685
nwd1	ENSDARG00000076110	NACHT and WD repeat domain containing 1 [Source:ZFIN;Acc:ZDB-GENE-071116-8]	0.00397527	1.44743	1.06076	4.45741	3.17981
cope	ENSDARG00000018562	coatomer protein complex, subunit epsilon [Source:ZFIN;Acc:ZDB-GENE-041114-59]	0.0040112	0.881137	0.776477	5.73841	4.789
PRR18 (2 of 2)	ENSDARG00000101597	proline rich 18 [Source:HGNC Symbol;Acc:HGNC:28574]	0.00403319	2.26624	1.18467	3.21805	1.5268
rragd	ENSDARG00000006279	ras-related GTP binding D [Source:ZFIN;Acc:ZDB-GENE-070620-6]	0.00403575	1.46068	1.06433	5.01355	3.66981
mpp5b	ENSDARG00000004721	membrane protein, palmitoylated 5b (MAGUK p55 subfamily member 5) [Source:ZFIN;Acc:ZDB-GENE-060531- 2]	0.00406144	0.910049	0.795433	5.51071	4.51712
rgs9b	ENSDARG00000045156	regulator of G-protein signaling 9b [Source:ZFIN;Acc:ZDB-GENE-040426-1708]	0.00406836	1.10219	0.909739	4.90024	3.73907
usf1	ENSDARG00000041689	upstream transcription factor 1 [Source:ZFIN;Acc:ZDB-GENE-040426-1072]	0.00408752	1.02659	0.867343	5.49518	4.44119
rps27.2	ENSDARG00000055475	ribosomal protein S27, isoform 2 [Source:ZFIN;Acc:ZDB-GENE-040426-1735]	0.00415975	0.646559	0.602577	7.39629	6.71295
diablob	ENSDARG00000014956	diablo, IAP-binding mitochondrial protein b [Source:ZFIN;Acc:ZDB-GENE-070112-202]	0.00417191	1.54324	1.08833	4.01219	2.42087
uprt	ENSDARG00000035549	uracil phosphoribosyltransferase (FUR1) homolog (S. cerevisiae) [Source:ZFIN;Acc:ZDB-GENE-040426- 2411]	0.00417191	0.804669	0.722867	6.08955	5.33156
si:ch211-38m6.6	ENSDARG00000076959	si:ch211-38m6.6 [Source:ZFIN;Acc:ZDB-GENE- 070705-179]	0.00424497	2.09877	1.1753	3.32394	1.26502
gbgt1l2	ENSDARG00000092718	globoside alpha-1,3-N- acetylgalactosaminyltransferase 1, like 2 [Source:ZFIN;Acc:ZDB-GENE-060531-71]	0.00424497	2.98167	1.13501	2.43395	-0.61932
samd7	ENSDARG00000060354	sterile alpha motif domain containing 7 [Source:ZFIN;Acc:ZDB-GENE-070912-549]	0.00424516	1.40755	1.04415	4.23786	2.76844
oxr1b	ENSDARG00000063310	oxidation resistance 1b [Source:ZFIN;Acc:ZDB- GENE-030131-2438]	0.00430139	0.843713	0.749954	6.13229	5.20069
ccnb1	ENSDARG00000051923	cyclin B1 [Source:ZFIN;Acc:ZDB-GENE-000406- 10]	0.00430189	0.879656	0.774379	5.59549	4.63458
hivep1	ENSDARG00000103658	human immunodeficiency virus type I enhancer binding protein 1 [Source:ZFIN;Acc:ZDB-GENE-070912-512]	0.00439506	0.726042	0.664328	6.53937	5.75829
rab7	ENSDARG00000020497	RAB7, member RAS oncogene family [Source:ZFIN;Acc:ZDB-GENE-040426-1352]	0.00441068	0.850923	0.754562	5.71063	4.79
slc24a3	ENSDARG00000006760	solute carrier family 24 (sodium/potassium/calcium exchanger), member 3 [Source:ZFIN;Acc:ZDB-GENE-090312-67]	0.00444797	0.896191	0.784867	6.67636	5.74108
zgc:103625	ENSDARG00000038770	zgc:103625 [Source:ZFIN;Acc:ZDB-GENE-040912- 116]	0.00445092	2.96614	1.12804	3.4621	1.94149
tnni1al	ENSDARG00000036671	troponin I, skeletal, slow like [Source:ZFIN;Acc:ZDB-GENE-040625-81]	0.00445092	0.698683	0.643232	6.55708	5.78471
fam169aa	ENSDARG00000059719	family with sequence similarity 169, member Aa [Source:ZFIN;Acc:ZDB-GENE-060825-117]	0.00447328	0.74287	0.676837	6.33397	5.51562
arl3l1	ENSDARG00000102393	ADP-ribosylation factor-like 3, like 1 [Source:ZFIN;Acc:ZDB-GENE-040426-1649]	0.00448168	1.19548	0.953977	4.81009	3.53396
ahr1b	ENSDARG00000023537	aryl hydrocarbon receptor 1b [Source:ZFIN;Acc:ZDB-GENE-050922-1]	0.00453074	0.82688	0.737543	5.81051	4.90872
mob3a	ENSDARG00000019113	MOB kinase activator 3A [Source:ZFIN;Acc:ZDB- GENE-030131-4091]	0.00456332	1.1233	0.917715	4.86388	3.67285
spata4	ENSDARG00000036189	spermatogenesis associated 4 [Source:ZFIN;Acc:ZDB-GENE-050417-153]	0.00459779	2.93219	1.12541	2.44907	-0.411802
lingo4a	ENSDARG00000094908	leucine rich repeat and Ig domain containing 4a [Source:ZFIN;Acc:ZDB-GENE-060503-275]	0.00465079	3.28867	1.0912	2.29358	-0.189409
ypel1	ENSDARG00000035630	yippee-like 1 (Drosophila) [Source:ZFIN;Acc:ZDB-GENE-040808-41]	0.00470188	0.883741	0.775655	5.97993	5.00905
grid2ipb	ENSDARG00000095603	glutamate receptor, ionotropic, delta 2 (Grid2) interacting protein, b [Source:ZFIN;Acc:ZDB-GENE- 040724-161]	0.00475355	1.09656	0.902476	5.21469	4.06928
tmem184ba	ENSDARG00000045147	transmembrane protein 184ba [Source:ZFIN;Acc:ZDB-GENE-050417-219]	0.00479372	0.72422	0.662075	6.70226	5.7793
acy3.1	ENSDARG00000093003	aspartoacylase (aminocyclase) 3, tandem duplicate 1 [Source:ZFIN;Acc:ZDB-GENE-040718-345]	0.00480347	1.55815	1.08444	4.29705	2.6726
pkig	ENSDARG00000086471	protein kinase (cAMP-dependent, catalytic) inhibitor gamma [Source:ZFIN;Acc:ZDB-GENE-050302-97]	0.00484643	0.983225	0.837897	5.45999	4.42565
cacnb3b	ENSDARG00000076030	calcium channel, voltage-dependent, beta 3b [Source:ZFIN;Acc:ZDB-GENE-090127-1]	0.00484765	1.16785	0.938202	4.81805	3.55762
rpgrb	ENSDARG00000057074	retinitis pigmentosa GTPase regulator b [Source:ZFIN;Acc:ZDB-GENE-081015-2]	0.00488717	0.949553	0.817174	5.59999	4.5407
si:ch211-39i2.2	ENSDARG00000104472	si:ch211-39i2.2 [Source:ZFIN;Acc:ZDB-GENE- 041008-126]	0.00489246	1.61088	1.09704	5.20182	4.68095
optn	ENSDARG00000002663	optineurin [Source:ZFIN;Acc:ZDB-GENE-030131- 8103]	0.00489466	0.793781	0.713068	5.90673	5.03228
vwa3a	ENSDARG00000087210	von Willebrand factor A domain containing 3A [Source:ZFIN;Acc:ZDB-GENE-131121-527]	0.00490688	1.48966	1.06373	4.08292	2.56868
rpl35	ENSDARG00000018334	ribosomal protein L35 [Source:ZFIN;Acc:ZDB- GENE-020419-2]	0.00492906	0.571483	0.539782	7.71176	7.07332
tma7	ENSDARG00000071670	translation machinery associated 7 homolog (S. cerevisiae) [Source:ZFIN;Acc:ZDB-GENE-061027-176]	0.00494913	1.03893	0.869843	5.16459	4.09591
srek1ip1	ENSDARG00000043728	SREK1-interacting protein 1 [Source:ZFIN;Acc:ZDB-GENE-051030-24]	0.00495776	1.20244	0.953801	4.68154	3.4051
ubqln4	ENSDARG00000052975	ubiquilin 4 [Source:ZFIN;Acc:ZDB-GENE-030131- 6269]	0.00495776	0.605236	0.567793	7.17357	6.50181
mtus1a	ENSDARG00000071562	microtubule associated tumor suppressor 1a [Source:ZFIN;Acc:ZDB-GENE-061103-409]	0.00497426	1.06939	0.886584	5.07478	3.96034
ptp4a1	ENSDARG00000006242	protein tyrosine phosphatase type IVA, member 1 [Source:ZFIN;Acc:ZDB-GENE-041121-11]	0.00497939	0.627689	0.586073	6.98263	6.26436
psma3	ENSDARG00000086618	proteasome (prosome, macropain) subunit, alpha type, 3 [Source:ZFIN;Acc:ZDB-GENE-050913-120]	0.00502758	0.620882	0.58049	6.92811	6.24208
tmem9b	ENSDARG00000025693	TMEM9 domain family, member B [Source:ZFIN;Acc:ZDB-GENE-030131-4656]	0.00505681	1.4609	1.05307	4.34751	2.87754
si:dkey-224j12.3	ENSDARG00000074519	si:dkey-224j12.3 [Source:ZFIN;Acc:ZDB-GENE- 131127-167]	0.00507014	2.01106	1.15375	3.85365	2.31036
si:ch211-114n24.6	ENSDARG00000036700	si:ch211-114n24.6 [Source:ZFIN;Acc:ZDB-GENE- 120214-26]	0.00507125	0.729248	0.665284	6.23268	5.44271
si:ch211-220m17.4	ENSDARG00000102602	si:ch211-220m17.4 [Source:ZFIN;Acc:ZDB-GENE- 141216-273]	0.00507343	1.7114	1.11632	3.68653	1.97449
zcchc17	ENSDARG00000018936	zinc finger, CCHC domain containing 17 [Source:ZFIN;Acc:ZDB-GENE-040325-2]	0.00509695	1.06569	0.883889	6.69199	5.86726
arl13a	ENSDARG00000052575	ADP-ribosylation factor-like 13A [Source:ZFIN;Acc:ZDB-GENE-040426-1790]	0.00513824	1.40726	1.03465	4.24492	2.76059
opn1mw2	ENSDARG00000044280	opsin 1 (cone pigments), medium-wave- sensitive, 2 [Source:ZFIN;Acc:ZDB-GENE-030728-5]	0.00516246	1.8946	1.14223	3.56175	1.54763
setd1bb	ENSDARG00000077244	SET domain containing 1B, b [Source:ZFIN;Acc:ZDB-GENE-080522-1]	0.00519481	2.25027	1.1612	3.01695	0.63193
atf4a	ENSDARG00000039515	activating transcription factor 4a [Source:ZFIN;Acc:ZDB-GENE-040426-2340]	0.00523157	0.841878	0.745734	6.13895	5.29824
cox6b1	ENSDARG00000045230	cytochrome c oxidase subunit VIb polypeptide 1 [Source:ZFIN;Acc:ZDB-GENE-040718-448]	0.00533252	1.03462	0.865467	5.01267	3.92392
cetn4	ENSDARG00000041215	centrin 4 [Source:ZFIN;Acc:ZDB-GENE-030826- 21]	0.00533716	1.41998	1.03712	4.1132	2.63193
cluap1	ENSDARG00000079110	clusterin associated protein 1 [Source:ZFIN;Acc:ZDB-GENE-040426-1943]	0.00539757	1.12683	0.914253	4.79966	3.61486
sumo2b	ENSDARG00000102741	small ubiquitin-like modifier 2b [Source:ZFIN;Acc:ZDB-GENE-040801-7]	0.00542913	0.678194	0.625509	6.58121	5.83181
axdnd1	ENSDARG00000062355	axonemal dynein light chain domain containing 1 [Source:ZFIN;Acc:ZDB-GENE-050208-341]	0.00544331	1.43738	1.04154	4.24104	2.76035
yipf4	ENSDARG00000030957	Yip1 domain family, member 4 [Source:ZFIN;Acc:ZDB-GENE-040426-2253]	0.00545559	1.08561	0.892586	4.93265	3.77163
lmo7b	ENSDARG00000053535	LIM domain 7b [Source:ZFIN;Acc:ZDB-GENE- 060825-242]	0.00545559	0.958296	0.82012	5.68794	4.67169
ccdc105	ENSDARG00000054136	coiled-coil domain containing 105 [Source:ZFIN;Acc:ZDB-GENE-131121-219]	0.00550119	2.32333	1.15385	2.88163	0.541644
copz1	ENSDARG00000017844	coatomer protein complex, subunit zeta 1 [Source:ZFIN;Acc:ZDB-GENE-000406-6]	0.00550193	0.740991	0.673115	6.09166	5.27967
cabp5a	ENSDARG00000002576	calcium binding protein 5a [Source:ZFIN;Acc:ZDB-GENE-040426-1655]	0.00551987	2.63647	1.13257	2.91578	0.699395
fstl3	ENSDARG00000025670	follistatin-like 3 (secreted glycoprotein) [Source:ZFIN;Acc:ZDB-GENE-050913-111]	0.00552149	1.74096	1.11391	3.9851	2.21005
dyrk4	ENSDARG00000070734	dual-specificity tyrosine-(Y)- phosphorylation regulated kinase 4 [Source:ZFIN;Acc:ZDB- GENE-091015-3]	0.00552234	0.759775	0.686897	6.17609	5.33521
unc13ba	ENSDARG00000017391	unc-13 homolog Ba (C. elegans) [Source:ZFIN;Acc:ZDB-GENE-100921-10]	0.00552857	0.843174	0.745714	6.2137	5.27645
smim7	ENSDARG00000074848	small integral membrane protein 7 [Source:ZFIN;Acc:ZDB-GENE-060810-180]	0.0055702	1.81165	1.12488	3.68547	1.78053
atoh7	ENSDARG00000069552	atonal homolog 7 [Source:ZFIN;Acc:ZDB-GENE- 000926-1]	0.00557801	2.44318	1.14495	2.92369	0.317914
SNORD29	ENSDARG00000080698	Small nucleolar RNA SNORD29 [Source:RFAM;Acc:RF00070]	0.0056093	2.42282	1.14023	3.22442	1.11765
DNAJA4	ENSDARG00000051762	DnaJ (Hsp40) homolog, subfamily A, member 4 [Source:HGNC Symbol;Acc:HGNC:14885]	0.00561133	0.988202	0.837332	5.44844	4.38839
CCDC39	ENSDARG00000100981	coiled-coil domain containing 39 [Source:HGNC Symbol;Acc:HGNC:25244]	0.00569051	1.40731	1.02931	4.15843	2.6618
hsd3b7	ENSDARG00000036966	hydroxy-delta-5-steroid dehydrogenase, 3 beta- and steroid delta-isomerase [Source:ZFIN;Acc:ZDB- GENE-030131-5673]	0.00571807	0.879046	0.769077	5.49828	4.54659
dnal1	ENSDARG00000034042	dynein, axonemal, light chain 1 [Source:ZFIN;Acc:ZDB-GENE-040801-178]	0.00573424	2.03395	1.13965	3.95634	2.03628
guca2b	ENSDARG00000104418	guanylate cyclase activator 2B (uroguanylin) [Source:ZFIN;Acc:ZDB-GENE-030131-4660]	0.00574444	1.72309	1.10909	3.62962	1.82966
nr1d1	ENSDARG00000033160	nuclear receptor subfamily 1, group d, member 1 [Source:ZFIN;Acc:ZDB-GENE-050105-1]	0.00591443	1.14761	0.921479	5.80435	4.63911
eya4	ENSDARG00000012397	EYA transcriptional coactivator and phosphatase 4 [Source:ZFIN;Acc:ZDB-GENE-050327-93]	0.00594389	0.820376	0.728958	6.28502	5.418
skor1a	ENSDARG00000069030	SKI family transcriptional corepressor 1a [Source:ZFIN;Acc:ZDB-GENE-080722-5]	0.00596175	1.464	1.04484	4.15251	2.65284
ankzf1	ENSDARG00000041904	ankyrin repeat and zinc finger domain containing 1 [Source:ZFIN;Acc:ZDB-GENE-050309-80]	0.00597787	0.876249	0.766476	6.10494	5.2469
golga7ba	ENSDARG00000036295	golgin A7 family, member Ba [Source:ZFIN;Acc:ZDB-GENE-050417-14]	0.00603882	0.846462	0.746517	5.67945	4.79774
dytn	ENSDARG00000071025	dystrotelin [Source:ZFIN;Acc:ZDB-GENE-070124- 2]	0.00608772	3.67852	0.989739	2.25101	-0.593087
dldh	ENSDARG00000008785	dihydrolipoamide dehydrogenase [Source:ZFIN;Acc:ZDB-GENE-040120-4]	0.00623925	0.572615	0.539399	7.70472	7.05037
anxa4	ENSDARG00000036456	annexin A4 [Source:ZFIN;Acc:ZDB-GENE-030707- 1]	0.00626626	0.921387	0.794535	5.90331	4.90238
casp8	ENSDARG00000058325	caspase 8, apoptosis-related cysteine peptidase [Source:ZFIN;Acc:ZDB-GENE-000713-1]	0.00636641	1.82632	1.11735	3.41412	1.52132
LYAR	ENSDARG00000098507	Ly1 antibody reactive [Source:HGNC Symbol;Acc:HGNC:26021]	0.00638632	1.01509	0.849782	5.48017	4.4294
cryba2a	ENSDARG00000030349	crystallin, beta A2a [Source:ZFIN;Acc:ZDB- GENE-040625-8]	0.00640312	0.527095	0.500838	7.67508	7.07876
si:dkey-217f16.3	ENSDARG00000052873	si:dkey-217f16.3 [Source:ZFIN;Acc:ZDB-GENE- 091112-21]	0.00640317	2.13514	1.13358	3.54468	1.24916
nrn1a	ENSDARG00000071860	neuritin 1a [Source:ZFIN;Acc:ZDB-GENE-040718- 212]	0.00642169	0.888238	0.773017	5.80487	4.88031
ist1	ENSDARG00000051888	increased sodium tolerance 1 homolog (yeast) [Source:ZFIN;Acc:ZDB-GENE-030131-179]	0.00644215	0.629097	0.585331	6.71466	6.01595
apoa2	ENSDARG00000015866	apolipoprotein A-II [Source:ZFIN;Acc:ZDB- GENE-030131-1046]	0.0066423	0.460944	0.443062	9.75527	9.22007
zgc:158785	ENSDARG00000062959	zgc:158785 [Source:ZFIN;Acc:ZDB-GENE-070112- 1712]	0.00666462	1.82535	1.11345	3.41874	1.50464
FTL (1 of 2)	ENSDARG00000018461	ferritin, light polypeptide [Source:HGNC Symbol;Acc:HGNC:3999]	0.00667708	0.957913	0.815538	5.17405	4.1392
ppm1na	ENSDARG00000010231	protein phosphatase, Mg2+/Mn2+ dependent, 1Na (putative) [Source:ZFIN;Acc:ZDB-GENE-040426-2731]	0.00668803	1.40111	1.01928	4.2942	2.86485
si:dkey-248g15.3	ENSDARG00000097959	si:dkey-248g15.3 [Source:ZFIN;Acc:ZDB-GENE- 131127-95]	0.00674746	1.36612	1.00691	4.29915	2.89279
SHROOM2 (1 of 2)	ENSDARG00000076371	shroom family member 2 [Source:HGNC Symbol;Acc:HGNC:630]	0.00674766	1.06408	0.875025	4.92044	3.81151
fam46ab	ENSDARG00000054641	family with sequence similarity 46, member Ab [Source:ZFIN;Acc:ZDB-GENE-071004-35]	0.00674913	1.14527	0.915918	4.81676	3.60709
ankrd46b	ENSDARG00000015780	ankyrin repeat domain 46b [Source:ZFIN;Acc:ZDB-GENE-050114-7]	0.00675713	1.39722	1.01732	4.06928	2.60092
mcl1b	ENSDARG00000008363	myeloid cell leukemia 1b [Source:ZFIN;Acc:ZDB-GENE-030825-1]	0.00677489	0.748515	0.676223	6.25472	5.50816
zgc:162144	ENSDARG00000037603	zgc:162144 [Source:ZFIN;Acc:ZDB-GENE-030131- 7630]	0.00685287	2.22485	1.13037	3.10082	1.30967
lrrc23	ENSDARG00000006174	leucine rich repeat containing 23 [Source:ZFIN;Acc:ZDB-GENE-041010-153]	0.00686397	3.16479	1.04912	2.14205	-1.04332
cfap52	ENSDARG00000101679	cilia and flagella associated protein 52 [Source:ZFIN;Acc:ZDB-GENE-050522-296]	0.0069001	2.1547	1.1296	3.36958	0.897187
gnmt	ENSDARG00000006840	glycine N-methyltransferase [Source:ZFIN;Acc:ZDB-GENE-040227-1]	0.00694672	0.73453	0.665662	6.49908	5.7076
fam161a	ENSDARG00000089742	family with sequence similarity 161, member A [Source:ZFIN;Acc:ZDB-GENE-110310-1]	0.006954	0.971081	0.822269	5.33636	4.30889
ASPH	ENSDARG00000078703	aspartate beta-hydroxylase [Source:HGNC Symbol;Acc:HGNC:757]	0.00696593	0.590596	0.553548	8.65953	8.00598
ier5	ENSDARG00000009881	immediate early response 5 [Source:ZFIN;Acc:ZDB-GENE-030616-127]	0.00704336	0.857343	0.751151	5.8105	4.88961
ubald1a	ENSDARG00000002362	UBA-like domain containing 1a [Source:ZFIN;Acc:ZDB-GENE-040718-191]	0.00704747	0.776574	0.695872	6.0996	5.24599
necap1	ENSDARG00000020798	NECAP endocytosis associated 1 [Source:ZFIN;Acc:ZDB-GENE-040426-1682]	0.00717831	0.737491	0.667468	6.27616	5.4828
zgc:73226	ENSDARG00000023759	zgc:73226 [Source:ZFIN;Acc:ZDB-GENE-050703- 8]	0.00722273	1.33091	0.991082	4.47771	3.02492
dll4	ENSDARG00000070425	delta-like 4 (Drosophila) [Source:ZFIN;Acc:ZDB-GENE-041014-73]	0.0072264	1.06513	0.873561	4.94703	3.79157
actc1a	ENSDARG00000042535	actin, alpha, cardiac muscle 1a [Source:ZFIN;Acc:ZDB-GENE-040520-4]	0.00725993	0.831393	0.733371	6.10815	5.20451
fabp3	ENSDARG00000023290	fatty acid binding protein 3, muscle and heart [Source:ZFIN;Acc:ZDB-GENE-020318-2]	0.0072732	0.658928	0.607886	6.55959	5.82169
pdcd10b	ENSDARG00000012591	programmed cell death 10b [Source:ZFIN;Acc:ZDB-GENE-040426-2607]	0.00750362	0.913692	0.786042	5.34546	4.37265
ttll10	ENSDARG00000090472	tubulin tyrosine ligase-like family, member 10 [Source:ZFIN;Acc:ZDB-GENE-081104-350]	0.00751699	1.51399	1.04564	3.90049	2.74665
si:ch211-238e22.1	ENSDARG00000099355	si:ch211-238e22.1 [Source:ZFIN;Acc:ZDB-GENE- 041210-345]	0.00751699	0.844937	0.741852	5.76691	4.84832
hmgn3	ENSDARG00000036754	high mobility group nucleosomal binding domain 3 [Source:ZFIN;Acc:ZDB-GENE-041114-180]	0.00751699	0.635387	0.589111	6.72648	6.00972
zdhhc2	ENSDARG00000034757	zinc finger, DHHC-type containing 2 [Source:ZFIN;Acc:ZDB-GENE-050320-58]	0.00752584	1.63939	1.07387	3.6808	1.98215
ZNF384 (2 of 2)	ENSDARG00000089032	zinc finger protein 384 [Source:HGNC Symbol;Acc:HGNC:11955]	0.0076444	1.22929	0.94902	4.43006	3.14529
rbm38	ENSDARG00000058818	RNA binding motif protein 38 [Source:ZFIN;Acc:ZDB-GENE-030131-5923]	0.00766164	0.943544	0.803779	5.14218	4.12343
fus	ENSDARG00000037968	FUS RNA binding protein [Source:ZFIN;Acc:ZDB- GENE-040426-1010]	0.00766164	0.641027	0.593415	6.61291	5.89872
slc2a1a	ENSDARG00000001437	solute carrier family 2 (facilitated glucose transporter), member 1a [Source:ZFIN;Acc:ZDB-GENE-030131- 3158]	0.00768234	1.22982	0.948851	4.94259	3.59521
si:dkeyp-1h4.9	ENSDARG00000094719	si:dkeyp-1h4.9 [Source:ZFIN;Acc:ZDB-GENE- 030131-8538]	0.0077158	2.60244	1.09762	2.52903	-0.0433187
sept4a	ENSDARG00000010385	septin 4a [Source:ZFIN;Acc:ZDB-GENE-051120- 87]	0.00773297	1.06584	0.871919	5.11232	4.07067
rpl18	ENSDARG00000029533	ribosomal protein L18 [Source:ZFIN;Acc:ZDB- GENE-040801-165]	0.00773297	0.594676	0.556196	7.63322	6.96439
si:ch73-352p18.4	ENSDARG00000088584	si:ch73-352p18.4 [Source:ZFIN;Acc:ZDB-GENE- 110411-101]	0.00778438	1.54357	1.05002	4.22279	2.78864
aldh7a1	ENSDARG00000018426	aldehyde dehydrogenase 7 family, member A1 [Source:ZFIN;Acc:ZDB-GENE-030131-6129]	0.00783418	0.541413	0.511973	7.73605	7.09035
slc24a1	ENSDARG00000041431	solute carrier family 24 (sodium/potassium/calcium exchanger), member 1 [Source:ZFIN;Acc:ZDB-GENE-060503-191]	0.00785118	1.5658	1.05484	4.28847	2.97815
lin7a	ENSDARG00000013414	lin-7 homolog A (C. elegans) [Source:ZFIN;Acc:ZDB-GENE-040426-1665]	0.00788944	0.806977	0.715455	6.50669	5.66138
nsfl1c	ENSDARG00000087640	NSFL1 (p97) cofactor (p47) [Source:ZFIN;Acc:ZDB-GENE-041114-160]	0.00789304	0.69034	0.631228	6.49426	5.74401
znf703	ENSDARG00000035563	zinc finger protein 703 [Source:ZFIN;Acc:ZDB- GENE-010717-1]	0.0078991	0.932573	0.796398	5.37537	4.38391
ggps1	ENSDARG00000023627	geranylgeranyl diphosphate synthase 1 [Source:ZFIN;Acc:ZDB-GENE-030131-8742]	0.00791596	1.08757	0.882221	4.86355	3.66265
psmg3	ENSDARG00000098391	proteasome (prosome, macropain) assembly chaperone 3 [Source:ZFIN;Acc:ZDB-GENE-040718-262]	0.00793961	1.20342	0.936103	4.83423	3.55139
aim1b	ENSDARG00000006060	absent in melanoma 1b [Source:ZFIN;Acc:ZDB- GENE-030131-7179]	0.00796117	0.67409	0.618739	6.61259	5.86702
atg101	ENSDARG00000043287	autophagy related 101 [Source:ZFIN;Acc:ZDB- GENE-051030-36]	0.00809704	1.42031	1.01475	4.10219	2.74502
zfp36l2	ENSDARG00000021806	zinc finger protein 36, C3H type-like 2 [Source:ZFIN;Acc:ZDB-GENE-030131-5873]	0.00810453	0.792409	0.704985	5.7279	4.88256
f11r.1	ENSDARG00000017320	F11 receptor, tandem duplicate 1 [Source:ZFIN;Acc:ZDB-GENE-030131-2416]	0.0081177	0.884388	0.76599	5.58722	4.62208
casz1	ENSDARG00000037030	castor zinc finger 1 [Source:ZFIN;Acc:ZDB- GENE-060130-108]	0.0081177	0.568744	0.534583	7.24253	6.6078
kri1	ENSDARG00000075380	KRI1 homolog [Source:ZFIN;Acc:ZDB-GENE- 040915-3]	0.00816344	0.787301	0.701287	6.42284	5.53613
hsph1	ENSDARG00000019874	heat shock 105/110 protein 1 [Source:ZFIN;Acc:ZDB-GENE-120410-4]	0.00818314	1.30526	0.975586	4.30664	2.86932
CNGB1 (1 of 2)	ENSDARG00000042107	cyclic nucleotide gated channel beta 1 [Source:HGNC Symbol;Acc:HGNC:2151]	0.00821846	0.793641	0.705611	6.10094	5.22097
tchp	ENSDARG00000035605	trichoplein, keratin filament binding [Source:ZFIN;Acc:ZDB-GENE-060421-3368]	0.00823885	1.02528	0.8484	4.94542	3.87281
ch25hl1.2	ENSDARG00000068138	cholesterol 25-hydroxylase like 1, tandem duplicate 2 [Source:ZFIN;Acc:ZDB-GENE-050419-90]	0.00825724	3.30142	0.996233	2.04607	-1.20428
ran	ENSDARG00000057026	RAN, member RAS oncogene family [Source:ZFIN;Acc:ZDB-GENE-990415-88]	0.00827237	0.474046	0.453817	8.56432	8.02065
zgc:158409	ENSDARG00000062326	zgc:158409 [Source:ZFIN;Acc:ZDB-GENE-061215- 23]	0.00835391	0.501254	0.47741	8.69022	8.11923
ccsapa	ENSDARG00000025325	centriole, cilia and spindle-associated protein a [Source:ZFIN;Acc:ZDB-GENE-111116-1]	0.00836293	1.0725	0.872693	5.2369	4.11312
mob4	ENSDARG00000056085	MOB family member 4, phocein [Source:ZFIN;Acc:ZDB-GENE-040801-174]	0.00843134	0.911778	0.782218	5.27029	4.30361
sec24b	ENSDARG00000071906	SEC24 family member B [Source:ZFIN;Acc:ZDB- GENE-030131-6565]	0.00846309	0.723242	0.654938	6.22989	5.439
ak1	ENSDARG00000001950	adenylate kinase 1 [Source:ZFIN;Acc:ZDB-GENE- 040822-37]	0.00846309	0.549978	0.518703	7.75722	7.11477
anp32b	ENSDARG00000023330	acidic (leucine-rich) nuclear phosphoprotein 32 family, member B [Source:ZFIN;Acc:ZDB-GENE-030131-719]	0.00850069	0.621911	0.577346	8.87284	8.20606
uqcc3	ENSDARG00000093382	ubiquinol-cytochrome c reductase complex assembly factor 3 [Source:ZFIN;Acc:ZDB-GENE-030131-8451]	0.00851924	1.7978	1.08815	3.45998	1.6272
dre-mir-726	ENSDARG00000082495	dre-mir-726 [Source:miRBase;Acc:MI0004770]	0.00855606	3.87074	0.931157	1.72179	-2.20428
nploc4	ENSDARG00000100487	nuclear protein localization 4 homolog (S. cerevisiae) [Source:ZFIN;Acc:ZDB-GENE-030131-5658]	0.00857208	0.716436	0.649768	6.05883	5.28118
rab5aa	ENSDARG00000018602	RAB5A, member RAS oncogene family, a [Source:ZFIN;Acc:ZDB-GENE-030131-139]	0.00877222	0.733224	0.661798	6.05284	5.24801
hebp2	ENSDARG00000042630	heme binding protein 2 [Source:ZFIN;Acc:ZDB- GENE-040426-914]	0.00878398	0.994616	0.829671	5.02145	3.95809
foxj1b	ENSDARG00000088290	forkhead box J1b [Source:ZFIN;Acc:ZDB-GENE- 041212-76]	0.00880938	2.2105	1.10188	2.95539	0.765017
gltscr2	ENSDARG00000100452	glioma tumor suppressor candidate region gene 2 [Source:ZFIN;Acc:ZDB-GENE-051120-21]	0.00883782	0.503268	0.478875	7.81167	7.21802
SFT2D2 (2 of 2)	ENSDARG00000071159	SFT2 domain containing 2 [Source:HGNC Symbol;Acc:HGNC:25140]	0.00886346	1.86247	1.09121	3.34408	1.45064
hgd	ENSDARG00000058005	homogentisate 1,2-dioxygenase [Source:ZFIN;Acc:ZDB-GENE-020802-5]	0.00887083	0.805227	0.712254	5.78472	4.89617
kxd1	ENSDARG00000051934	KxDL motif containing 1 [Source:ZFIN;Acc:ZDB- GENE-040801-207]	0.00894182	1.85071	1.08875	3.48413	1.49473
rnf41l	ENSDARG00000073918	ring finger protein 41, like [Source:ZFIN;Acc:ZDB-GENE-030131-9441]	0.00894985	1.45712	1.0192	3.85923	2.36122
pam16	ENSDARG00000102822	presequence translocase-associated motor 16 homolog (S. cerevisiae) [Source:ZFIN;Acc:ZDB-GENE-040426- 1776]	0.00896169	1.57799	1.04832	3.91584	2.29171
cirbpb	ENSDARG00000013351	cold inducible RNA binding protein b [Source:ZFIN;Acc:ZDB-GENE-030131-5841]	0.00902844	0.48312	0.461374	9.48033	8.93354
nrn1la	ENSDARG00000069368	neuritin 1-like a [Source:ZFIN;Acc:ZDB-GENE- 050419-106]	0.0090931	1.36426	0.990433	4.23145	2.77282
atp6v0d1	ENSDARG00000069090	ATPase, H+ transporting, lysosomal V0 subunit d1 [Source:ZFIN;Acc:ZDB-GENE-030131-1531]	0.0090931	0.793032	0.703525	6.41944	5.58125
gid8b	ENSDARG00000037589	GID complex subunit 8 homolog b (S. cerevisiae) [Source:ZFIN;Acc:ZDB-GENE-030515-4]	0.00915489	0.95914	0.808453	5.17777	4.27802
si:ch73-123f19.1	ENSDARG00000096784	si:ch73-123f19.1 [Source:ZFIN;Acc:ZDB-GENE- 130603-66]	0.00916048	1.64891	1.06053	3.60849	1.95668
apopt1	ENSDARG00000092473	apoptogenic 1, mitochondrial [Source:ZFIN;Acc:ZDB-GENE-090313-66]	0.00917609	1.00104	0.831986	4.97797	3.89448
SNORA68	ENSDARG00000084828	Small nucleolar RNA SNORA68 [Source:RFAM;Acc:RF00263]	0.00920561	0.55639	0.523534	7.48469	6.8542
or130-1	ENSDARG00000101798	odorant receptor, family H, subfamily 130, member 1 [Source:ZFIN;Acc:ZDB-GENE-070806-44]	0.00925922	4.11845	0.890637	1.62271	-2.20428
vapal	ENSDARG00000046048	VAMP (vesicle-associated membrane protein)- associated protein A, like [Source:ZFIN;Acc:ZDB-GENE- 040718-281]	0.00925922	0.820556	0.721881	5.5768	4.69042
cyhr1	ENSDARG00000061057	cysteine/histidine-rich 1 [Source:ZFIN;Acc:ZDB-GENE-060929-720]	0.00926263	0.838819	0.733948	5.52267	4.62677
tescb	ENSDARG00000030839	tescalcin b [Source:ZFIN;Acc:ZDB-GENE-040426- 1903]	0.00937713	1.5506	1.03899	3.83647	2.31036
esf1	ENSDARG00000008740	ESF1, nucleolar pre-rRNA processing protein, homolog (S. cerevisiae) [Source:ZFIN;Acc:ZDB-GENE-030131- 4917]	0.00940544	0.872555	0.755349	6.55805	5.65002
ankef1a	ENSDARG00000019135	ankyrin repeat and EF-hand domain containing 1a [Source:ZFIN;Acc:ZDB-GENE-041001-196]	0.00943734	2.2803	1.0867	3.15613	0.965642
KCNH2 (2 of 2)	ENSDARG00000060053	potassium channel, voltage gated eag related subfamily H, member 2 [Source:HGNC Symbol;Acc:HGNC:6251]	0.00945716	0.866872	0.751647	5.37211	4.46019
tesk2	ENSDARG00000061450	testis-specific kinase 2 [Source:ZFIN;Acc:ZDB-GENE-070209-68]	0.00950559	0.912791	0.780094	5.50834	4.54149
atg16l2	ENSDARG00000043238	ATG16 autophagy related 16-like 2 (S. cerevisiae) [Source:ZFIN;Acc:ZDB-GENE-060503-197]	0.009551	1.0298	0.84629	4.84046	3.74357
stk25b	ENSDARG00000039022	serine/threonine kinase 25b [Source:ZFIN;Acc:ZDB-GENE-040426-2537]	0.009551	0.741077	0.666309	6.01896	5.21564
eif3i	ENSDARG00000017445	eukaryotic translation initiation factor 3, subunit I [Source:ZFIN;Acc:ZDB-GENE-040426-1922]	0.00955815	0.551205	0.518978	7.29378	6.67068
rhoab	ENSDARG00000094673	ras homolog gene family, member Ab [Source:ZFIN;Acc:ZDB-GENE-040322-2]	0.0095854	0.680623	0.621724	6.65635	5.91556
mrpl48	ENSDARG00000035167	mitochondrial ribosomal protein L48 [Source:ZFIN;Acc:ZDB-GENE-041008-125]	0.00959052	1.46382	1.0158	4.42536	2.92696
RDH13 (3 of 3)	ENSDARG00000054797	retinol dehydrogenase 13 (all-trans/9-cis) [Source:HGNC Symbol;Acc:HGNC:19978]	0.00960027	2.25144	1.08896	2.93672	0.919681
zpr1	ENSDARG00000043542	ZPR1 zinc finger [Source:ZFIN;Acc:ZDB-GENE- 040426-2110]	0.00960027	0.742214	0.667016	5.89672	5.08151
sall2	ENSDARG00000075116	spalt-like transcription factor 2 [Source:ZFIN;Acc:ZDB-GENE-030829-32]	0.00960108	1.29699	0.964247	4.22828	2.90288
aqp8a.1	ENSDARG00000045141	aquaporin 8a, tandem duplicate 1 [Source:ZFIN;Acc:ZDB-GENE-040912-106]	0.00973245	0.969048	0.812379	5.47505	4.45428
C5H8orf4 (2 of 2)	ENSDARG00000079497	chromosome 8 open reading frame 4 [Source:HGNC Symbol;Acc:HGNC:1357]	0.00975547	1.40611	0.999235	4.03742	2.59938
tspan33	ENSDARG00000004497	tetraspanin 33 [Source:ZFIN;Acc:ZDB-GENE- 040718-361]	0.00978062	1.2994	0.964219	4.15715	2.85982
sox2	ENSDARG00000070913	SRY (sex determining region Y)-box 2 [Source:ZFIN;Acc:ZDB-GENE-030909-1]	0.00980959	0.814261	0.716611	5.72097	4.82057
emc7	ENSDARG00000012144	ER membrane protein complex subunit 7 [Source:ZFIN;Acc:ZDB-GENE-041001-170]	0.00985389	0.788091	0.698802	5.98992	5.10457
cops8	ENSDARG00000024846	COP9 signalosome subunit 8 [Source:ZFIN;Acc:ZDB-GENE-040426-982]	0.00988811	0.775509	0.690053	5.83532	4.9848
slitrk4	ENSDARG00000079781	SLIT and NTRK-like family, member 4 [Source:ZFIN;Acc:ZDB-GENE-140303-1]	0.00989619	0.889448	0.764839	5.27779	4.30293
im:7148292	ENSDARG00000087779	im:7148292 [Source:ZFIN;Acc:ZDB-GENE-050506- 149]	0.00993734	0.696496	0.633181	6.49149	5.73271
aurkaip1	ENSDARG00000074985	aurora kinase A interacting protein 1 [Source:ZFIN;Acc:ZDB-GENE-070928-24]	0.00996425	1.01539	0.837281	4.8454	3.76807
itsn2b	ENSDARG00000054973	intersectin 2b [Source:ZFIN;Acc:ZDB-GENE- 050309-102]	0.00996598	0.558617	0.52484	7.7575	7.12252
phyhd1	ENSDARG00000029905	phytanoyl-CoA dioxygenase domain containing 1 [Source:ZFIN;Acc:ZDB-GENE-041114-159]	0.0100143	0.985874	0.821083	4.95645	3.91656
h2afvb	ENSDARG00000099214	H2A histone family, member Vb [Source:ZFIN;Acc:ZDB-GENE-050506-24]	0.0100506	0.867907	0.751023	5.73006	4.7828
bin2a	ENSDARG00000003219	bridging integrator 2a [Source:ZFIN;Acc:ZDB- GENE-041114-126]	0.010083	0.699055	0.6349	6.72099	6.0217
ptges3b	ENSDARG00000089626	prostaglandin E synthase 3b (cytosolic) [Source:ZFIN;Acc:ZDB-GENE-040625-144]	0.0101413	0.550779	0.518242	7.33605	6.71841
arl5a	ENSDARG00000018627	ADP-ribosylation factor-like 5A [Source:ZFIN;Acc:ZDB-GENE-040718-28]	0.0102258	1.39254	0.992389	4.01984	2.57684
lmbrd1	ENSDARG00000104223	LMBR1 domain containing 1 [Source:ZFIN;Acc:ZDB-GENE-041212-36]	0.0102351	0.730027	0.657381	5.97259	5.13986
dpm2	ENSDARG00000095623	dolichyl-phosphate mannosyltransferase polypeptide 2, regulatory subunit [Source:ZFIN;Acc:ZDB- GENE-030131-9093]	0.0102887	1.62353	1.04606	3.89275	2.28769
gabarapb	ENSDARG00000052082	GABA(A) receptor-associated protein b [Source:ZFIN;Acc:ZDB-GENE-101102-9]	0.010297	1.01689	0.837115	4.91018	3.82454
cacna1fb	ENSDARG00000023683	calcium channel, voltage-dependent, L type, alpha 1F subunit [Source:ZFIN;Acc:ZDB-GENE-031104-1]	0.0103619	1.02809	0.842801	5.74102	4.65107
tob1a	ENSDARG00000032619	transducer of ERBB2, 1a [Source:ZFIN;Acc:ZDB- GENE-031030-4]	0.0103619	0.609717	0.565985	6.95021	6.26262
tceb2	ENSDARG00000097740	transcription elongation factor B (SIII), polypeptide 2 [Source:ZFIN;Acc:ZDB-GENE-020415-1]	0.0103619	0.596872	0.555725	6.82095	6.14846
tmem51a	ENSDARG00000068575	transmembrane protein 51a [Source:ZFIN;Acc:ZDB-GENE-061103-481]	0.0103655	1.33289	0.972637	4.08343	2.68311
cfap97	ENSDARG00000056381	cilia and flagella associated protein 97 [Source:ZFIN;Acc:ZDB-GENE-030131-9405]	0.0103914	1.32159	0.968756	4.11891	2.70287
homeza	ENSDARG00000054304	homeobox and leucine zipper encoding a [Source:ZFIN;Acc:ZDB-GENE-030616-592]	0.0105383	1.1294	0.891855	4.51975	3.3359
neto1	ENSDARG00000068483	neuropilin (NRP) and tolloid (TLL)-like 1 [Source:ZFIN;Acc:ZDB-GENE-070912-592]	0.0105594	2.29296	1.07908	2.71758	0.353456
si:ch1073-249f22.1	ENSDARG00000093463	si:ch1073-249f22.1 [Source:ZFIN;Acc:ZDB-GENE- 131120-87]	0.0105678	1.14504	0.89872	4.66505	3.47339
si:ch211-175m2.5	ENSDARG00000089019	si:ch211-175m2.5 [Source:ZFIN;Acc:ZDB-GENE- 130530-947]	0.0105864	1.82406	1.07063	3.40586	1.58506
cyb561a3b	ENSDARG00000028257	cytochrome b561 family, member A3b [Source:ZFIN;Acc:ZDB-GENE-091204-222]	0.0105864	3.39152	0.954444	2.00363	-1.3358
kif3b	ENSDARG00000101120	kinesin family member 3B [Source:ZFIN;Acc:ZDB-GENE-050119-3]	0.0106381	0.674903	0.616241	6.25024	5.50076
ndufa7	ENSDARG00000036684	NADH dehydrogenase (ubiquinone) 1 alpha subcomplex, 7 [Source:ZFIN;Acc:ZDB-GENE-040801-169]	0.0106701	1.16846	0.908619	4.40545	3.18132
fgf10a	ENSDARG00000030932	fibroblast growth factor 10a [Source:ZFIN;Acc:ZDB-GENE-030715-1]	0.0106701	1.02909	0.842344	4.78339	3.6881
degs1	ENSDARG00000007347	delta(4)-desaturase, sphingolipid 1 [Source:ZFIN;Acc:ZDB-GENE-030131-5283]	0.0106848	1.26162	0.945924	4.31601	3.07732
unc119.2	ENSDARG00000004459	unc-119 homolog 2 [Source:ZFIN;Acc:ZDB-GENE- 030131-7635]	0.0107056	2.55017	1.05957	3.58465	2.28364
znf706	ENSDARG00000056307	zinc finger protein 706 [Source:ZFIN;Acc:ZDB- GENE-040718-454]	0.0107308	0.853255	0.740313	5.8242	4.89567
mrs2	ENSDARG00000062872	MRS2 magnesium transporter [Source:ZFIN;Acc:ZDB-GENE-141211-29]	0.0107481	1.32424	0.967811	5.03765	4.60948
ptges3a	ENSDARG00000037284	prostaglandin E synthase 3a (cytosolic) [Source:ZFIN;Acc:ZDB-GENE-040426-2200]	0.0107775	0.636859	0.586953	6.5249	5.82629
styx	ENSDARG00000057699	serine/threonine/tyrosine interacting protein [Source:ZFIN;Acc:ZDB-GENE-050522-45]	0.0108086	1.02222	0.838344	5.04832	3.99709
C13H2orf50	ENSDARG00000078140	chromosome 2 open reading frame 50 [Source:HGNC Symbol;Acc:HGNC:26324]	0.0108444	2.62763	1.04772	2.45314	-0.300605
ube2na	ENSDARG00000008748	ubiquitin-conjugating enzyme E2Na [Source:ZFIN;Acc:ZDB-GENE-040426-2873]	0.0108816	0.61478	0.569572	7.06814	6.39475
rnf183	ENSDARG00000097289	Uncharacterized protein [Source:UniProtKB/TrEMBL;Acc:X1WDW9]	0.0109271	1.02338	0.838628	4.83158	3.73551
trappc6b	ENSDARG00000016463	trafficking protein particle complex 6b [Source:ZFIN;Acc:ZDB-GENE-041010-122]	0.0109676	1.49506	1.01505	4.0138	2.44913
mlf2	ENSDARG00000034616	myeloid leukemia factor 2 [Source:ZFIN;Acc:ZDB-GENE-050913-67]	0.0109677	0.741505	0.664626	6.47333	5.66475
csnk1da	ENSDARG00000008370	casein kinase 1, delta a [Source:ZFIN;Acc:ZDB-GENE-030131-825]	0.0109677	0.515784	0.488444	7.67124	7.07155
BX957331.1	ENSDARG00000098380	No description	0.011039	0.6499	0.5968	7.31365	6.60759
si:ch211-250g4.3	ENSDARG00000092945	si:ch211-250g4.3 [Source:ZFIN;Acc:ZDB-GENE- 060503-506]	0.0110415	0.958722	0.803038	5.94739	4.92066
tmem255a	ENSDARG00000073911	transmembrane protein 255A [Source:ZFIN;Acc:ZDB-GENE-070412-2]	0.0111284	1.14588	0.897016	4.97827	3.84174
gpr137	ENSDARG00000037244	G protein-coupled receptor 137 [Source:ZFIN;Acc:ZDB-GENE-040718-443]	0.0113012	1.82533	1.06478	3.4204	1.5882
snrnp25	ENSDARG00000020363	small nuclear ribonucleoprotein 25 [Source:ZFIN;Acc:ZDB-GENE-050417-179]	0.0113335	1.59452	1.03422	3.85207	2.19939
si:ch211-167j9.4	ENSDARG00000097770	si:ch211-167j9.4 [Source:ZFIN;Acc:ZDB-GENE- 131121-196]	0.0113521	1.63521	1.0413	3.58859	2.07493
ube2d2l	ENSDARG00000099749	ubiquitin-conjugating enzyme E2D 2 (UBC4/5 homolog, yeast), like [Source:ZFIN;Acc:ZDB-GENE-030131- 7384]	0.0113563	1.14013	0.893699	4.48161	3.30168
rrn3	ENSDARG00000102997	RRN3 RNA polymerase I transcription factor homolog (S. cerevisiae) [Source:ZFIN;Acc:ZDB-GENE-080225- 1]	0.0113688	0.92315	0.781887	5.18619	4.18609
ppp3r1b	ENSDARG00000069360	protein phosphatase 3 (formerly 2B), regulatory s1ubunit B, alpha isoform, b [Source:ZFIN;Acc:ZDB-GENE-040912-18]	0.0114444	0.61225	0.567148	6.55139	5.86983
mid1ip1b	ENSDARG00000019302	MID1 interacting protein 1b [Source:ZFIN;Acc:ZDB-GENE-040426-1720]	0.0116665	0.837876	0.728899	5.37701	4.46606
AC024175.9	ENSDARG00000081369	No description	0.0116753	0.981617	0.814412	10.5798	9.65289
C15H11orf53 (2 of 2)	ENSDARG00000058254	chromosome 11 open reading frame 53 [Source:HGNC Symbol;Acc:HGNC:30527]	0.0116807	3.79598	0.865911	1.53489	-1.99676
CR735126.1	ENSDARG00000044212	Uncharacterized protein [Source:UniProtKB/TrEMBL;Acc:F1Q4P0]	0.0117294	0.674338	0.614721	7.31113	6.59443
zgc:101783	ENSDARG00000045824	zgc:101783 [Source:ZFIN;Acc:ZDB-GENE-040912- 48]	0.0117533	1.06125	0.855505	4.87861	3.74916
SCARNA2	ENSDARG00000104511	Small Cajal body-specific RNA 2 [Source:RFAM;Acc:RF01268]	0.0117572	1.34748	0.970454	4.27705	2.66561
rabif	ENSDARG00000002690	RAB interacting factor [Source:ZFIN;Acc:ZDB- GENE-040718-216]	0.0117966	2.01658	1.07065	3.12883	1.16869
thoc1	ENSDARG00000088246	THO complex 1 [Source:ZFIN;Acc:ZDB-GENE- 030826-9]	0.0118035	0.691305	0.627277	6.57738	5.79948
ptpdc1a	ENSDARG00000061656	protein tyrosine phosphatase domain containing 1a [Source:ZFIN;Acc:ZDB-GENE-070112-632]	0.0118871	1.20934	0.920779	4.34644	3.12994
slc16a6b	ENSDARG00000060246	solute carrier family 16, member 6b [Source:ZFIN;Acc:ZDB-GENE-110208-3]	0.0119049	0.951273	0.796922	5.23677	4.18537
zgc:173573	ENSDARG00000069796	zgc:173573 [Source:ZFIN;Acc:ZDB-GENE-071004- 105]	0.0119869	0.778557	0.689058	6.05148	5.22592
gng13a	ENSDARG00000024740	guanine nucleotide binding protein (G protein), gamma 13a [Source:ZFIN;Acc:ZDB-GENE-081022-188]	0.012151	2.86959	1.0024	2.71476	1.11765
nfe2l3	ENSDARG00000019810	nuclear factor, erythroid 2-like 3 [Source:ZFIN;Acc:ZDB-GENE-040426-2334]	0.0123051	0.823556	0.718591	5.44313	4.54199
osgn1	ENSDARG00000052279	oxidative stress induced growth inhibitor 1 [Source:ZFIN;Acc:ZDB-GENE-040426-864]	0.0123801	1.10711	0.875428	4.716	3.55815
mapk15	ENSDARG00000100822	mitogen-activated protein kinase 15 [Source:ZFIN;Acc:ZDB-GENE-050522-307]	0.0124144	1.54681	1.01834	3.61365	1.98613
vdac1	ENSDARG00000045132	voltage-dependent anion channel 1 [Source:ZFIN;Acc:ZDB-GENE-030131-6514]	0.0124653	0.502643	0.476643	7.49627	6.92581
TCEB2 (2 of 2)	ENSDARG00000097471	transcription elongation factor B (SIII), polypeptide 2 (18kDa, elongin B) [Source:HGNC Symbol;Acc:HGNC:11619]	0.0124669	0.583966	0.543911	6.8325	6.17333
SUN1 (2 of 2)	ENSDARG00000077178	Sad1 and UNC84 domain containing 1 [Source:HGNC Symbol;Acc:HGNC:18587]	0.0124843	1.47199	1.00103	4.05194	2.52287
uckl1a	ENSDARG00000001686	uridine-cytidine kinase 1-like 1a [Source:ZFIN;Acc:ZDB-GENE-040724-238]	0.0124843	1.30726	0.95413	4.06971	2.67538
si:dkey-94f20.4	ENSDARG00000016923	si:dkey-94f20.4 [Source:ZFIN;Acc:ZDB-GENE- 121214-276]	0.0125266	1.42405	0.98882	3.80988	2.34736
impg2a	ENSDARG00000019782	interphotoreceptor matrix proteoglycan 2a [Source:ZFIN;Acc:ZDB-GENE-140106-217]	0.0125479	0.894775	0.762638	5.25158	4.2944
camkk1b	ENSDARG00000015134	calcium/calmodulin-dependent protein kinase kinase 1, alpha b [Source:ZFIN;Acc:ZDB-GENE-080722-13]	0.0125712	1.40514	0.983486	3.84487	2.39555
crygm2d16	ENSDARG00000076790	crystallin, gamma M2d16 [Source:ZFIN;Acc:ZDB- GENE-071004-53]	0.0127197	0.781825	0.690286	5.83963	4.99616
rpl5a	ENSDARG00000020197	ribosomal protein L5a [Source:ZFIN;Acc:ZDB- GENE-030131-5161]	0.012733	0.499763	0.47407	8.62105	8.0612
cntnap5a	ENSDARG00000073920	contactin associated protein-like 5a [Source:ZFIN;Acc:ZDB-GENE-081105-126]	0.0127377	0.864698	0.743933	5.31377	4.39673
ddah2	ENSDARG00000105009	dimethylarginine dimethylaminohydrolase 2 [Source:ZFIN;Acc:ZDB-GENE-030131-913]	0.0127561	0.991613	0.817036	4.93412	3.90621
bnip4	ENSDARG00000022832	BCL2/adenovirus E1B interacting protein 4 [Source:ZFIN;Acc:ZDB-GENE-051113-212]	0.0127561	0.921032	0.777692	5.27129	4.25781
polr2l	ENSDARG00000058349	polymerase (RNA) II (DNA directed) polypeptide L [Source:ZFIN;Acc:ZDB-GENE-050522-181]	0.0127623	1.50305	1.00655	3.66459	2.10307
vps37a	ENSDARG00000017119	vacuolar protein sorting 37A [Source:ZFIN;Acc:ZDB-GENE-030131-8312]	0.0127681	0.888283	0.758246	5.45296	4.48685
impg2b	ENSDARG00000100105	interphotoreceptor matrix proteoglycan 2b [Source:ZFIN;Acc:ZDB-GENE-081031-56]	0.0128918	0.696372	0.629855	6.49687	5.73238
pfdn5	ENSDARG00000035043	prefoldin 5 [Source:ZFIN;Acc:ZDB-GENE-030131- 6858]	0.0131824	1.06917	0.855142	4.60437	3.45593
nek10	ENSDARG00000025335	NIMA-related kinase 10 [Source:ZFIN;Acc:ZDB- GENE-130530-570]	0.0132118	1.91937	1.05194	3.65622	2.01822
cfl1	ENSDARG00000021124	cofilin 1 [Source:ZFIN;Acc:ZDB-GENE-030131- 215]	0.0133134	0.457362	0.437307	8.23705	7.70705
nqo1	ENSDARG00000010250	NAD(P)H dehydrogenase, quinone 1 [Source:ZFIN;Acc:ZDB-GENE-030131-1226]	0.0133757	0.739096	0.659939	6.13191	5.32186
hspb6	ENSDARG00000077236	heat shock protein, alpha-crystallin- related, b6 [Source:ZFIN;Acc:ZDB-GENE-080214-7]	0.0133842	0.929854	0.781402	5.59163	4.97691
brd7	ENSDARG00000008380	bromodomain containing 7 [Source:ZFIN;Acc:ZDB-GENE-040426-2687]	0.0133842	0.678431	0.616154	6.16496	5.40828
eif3m	ENSDARG00000013931	eukaryotic translation initiation factor 3, subunit M [Source:ZFIN;Acc:ZDB-GENE-040426-2643]	0.0135601	0.549724	0.515437	7.17219	6.55914
or133-5	ENSDARG00000092193	odorant receptor, family H, subfamily 133, member 5 [Source:ZFIN;Acc:ZDB-GENE-070806-38]	0.0136321	6.60916	0.52423	0.685472	-3.64877
KNCN	ENSDARG00000101899	kinocilin [Source:HGNC Symbol;Acc:HGNC:26488]	0.0136444	4.24008	0.775301	1.46388	-2.57277
tmprss13a	ENSDARG00000100969	transmembrane protease, serine 13a [Source:ZFIN;Acc:ZDB-GENE-090309-3]	0.0136476	1.23427	0.923539	4.25688	2.92725
otofa	ENSDARG00000030832	otoferlin a [Source:ZFIN;Acc:ZDB-GENE-030131- 7778]	0.0136947	0.713089	0.641169	6.85294	6.02962
bzw1b	ENSDARG00000099148	basic leucine zipper and W2 domains 1b [Source:ZFIN;Acc:ZDB-GENE-040426-2881]	0.0136969	0.691308	0.625368	5.98368	5.21324
coro2bb	ENSDARG00000063604	coronin, actin binding protein, 2Bb [Source:ZFIN;Acc:ZDB-GENE-071009-5]	0.0138463	1.79768	1.04367	3.20941	1.40691
phb	ENSDARG00000057414	prohibitin [Source:ZFIN;Acc:ZDB-GENE-030131- 6577]	0.0138463	0.682184	0.618544	6.16591	5.41314
atcaya	ENSDARG00000071678	ataxia, cerebellar, Cayman type a [Source:ZFIN;Acc:ZDB-GENE-070705-185]	0.013905	1.04877	0.84333	5.11931	4.00767
sgk494b	ENSDARG00000086169	uncharacterized serine/threonine-protein kinase SgK494b [Source:ZFIN;Acc:ZDB-GENE-120215-252]	0.0140347	1.09267	0.863813	4.66593	3.52441
cript	ENSDARG00000102511	cysteine-rich PDZ-binding protein [Source:ZFIN;Acc:ZDB-GENE-050417-451]	0.0140766	1.15936	0.89264	4.74336	3.53561
RPS11 (2 of 2)	ENSDARG00000093606	ribosomal protein S11 [Source:HGNC Symbol;Acc:HGNC:10384]	0.0140821	2.00691	1.05125	2.9321	0.849979
gss	ENSDARG00000037706	glutathione synthetase [Source:ZFIN;Acc:ZDB- GENE-041010-208]	0.0140821	0.955623	0.794474	5.07201	4.07147
fibpa	ENSDARG00000016058	fibroblast growth factor (acidic) intracellular binding protein a [Source:ZFIN;Acc:ZDB-GENE- 040426-1363]	0.0140954	0.922791	0.775975	5.15494	4.1648
tmem11	ENSDARG00000070866	transmembrane protein 11 [Source:ZFIN;Acc:ZDB-GENE-050417-37]	0.0141129	0.892428	0.758251	5.10685	4.13723
si:ch211-175f12.2	ENSDARG00000095831	si:ch211-175f12.2 [Source:ZFIN;Acc:ZDB-GENE- 110411-220]	0.0142263	1.52143	1.00247	3.59064	2.01094
si:rp71-84d9.2	ENSDARG00000091585	si:rp71-84d9.2 [Source:ZFIN;Acc:ZDB-GENE- 130530-1027]	0.0142644	2.74909	0.988736	2.3359	-0.11932
eif2s1a	ENSDARG00000005827	eukaryotic translation initiation factor 2, subunit 1 alpha a [Source:ZFIN;Acc:ZDB-GENE-030131-526]	0.0142646	0.68312	0.618823	6.06578	5.30644
IWS1	ENSDARG00000087950	IWS1 homolog (S. cerevisiae) [Source:HGNC Symbol;Acc:HGNC:25467]	0.0143354	0.604961	0.559342	7.34247	6.67551
cd63	ENSDARG00000025147	CD63 molecule [Source:ZFIN;Acc:ZDB-GENE- 030131-180]	0.0144177	0.751701	0.667536	5.90752	5.11237
alg3	ENSDARG00000053155	asparagine-linked glycosylation 3 (alpha-1,3- mannosyltransferase) [Source:ZFIN;Acc:ZDB-GENE-050522- 334]	0.0144204	1.17949	0.899672	4.40393	3.15755
hspa4l	ENSDARG00000053544	heat shock protein 4 like [Source:ZFIN;Acc:ZDB-GENE-030131-2412]	0.0144368	0.565149	0.527539	6.96159	6.32814
arfip2a	ENSDARG00000059244	ADP-ribosylation factor interacting protein 2a [Source:ZFIN;Acc:ZDB-GENE-041010-221]	0.0144542	0.975661	0.804541	4.98793	3.95407
s1pr1	ENSDARG00000042690	sphingosine-1-phosphate receptor 1 [Source:ZFIN;Acc:ZDB-GENE-001228-2]	0.0145239	1.03726	0.835942	4.89309	3.80707
snrnp27	ENSDARG00000035625	small nuclear ribonucleoprotein 27 (U4/U6.U5) [Source:ZFIN;Acc:ZDB-GENE-040718-457]	0.0145239	0.7248	0.648616	5.9317	5.1702
hcn3	ENSDARG00000027192	hyperpolarization activated cyclic nucleotide-gated potassium channel 3 [Source:ZFIN;Acc:ZDB- GENE-060503-193]	0.0145691	1.45136	0.985035	3.71205	2.18803
tnnt1	ENSDARG00000037954	troponin T type 1 (skeletal, slow) [Source:ZFIN;Acc:ZDB-GENE-080723-27]	0.0146725	0.864391	0.740362	5.48213	4.53409
tpi1a	ENSDARG00000025012	triosephosphate isomerase 1a [Source:ZFIN;Acc:ZDB-GENE-020416-3]	0.0147126	0.981529	0.807045	4.84065	3.8138
dcun1d5	ENSDARG00000100363	DCN1, defective in cullin neddylation 1, domain containing 5 (S. cerevisiae) [Source:ZFIN;Acc:ZDB- GENE-040426-2603]	0.0148696	0.82307	0.714314	5.32578	4.43101
setb	ENSDARG00000003920	SET translocation (myeloid leukemia- associated) B [Source:ZFIN;Acc:ZDB-GENE-030131-433]	0.0149048	0.442902	0.424194	8.50343	7.98267
DNAH2	ENSDARG00000087352	dynein, axonemal, heavy chain 2 [Source:HGNC Symbol;Acc:HGNC:2948]	0.015033	0.982064	0.806634	5.37638	4.3889
si:dkey-152p16.6	ENSDARG00000104181	si:dkey-152p16.6 [Source:ZFIN;Acc:ZDB-GENE- 030131-8575]	0.0150749	0.790214	0.692722	5.84719	4.97397
abca4a	ENSDARG00000057169	ATP-binding cassette, sub-family A (ABC1), member 4a [Source:ZFIN;Acc:ZDB-GENE-050517-3]	0.0151045	0.730617	0.652111	5.78585	5.00059
zdhhc8a	ENSDARG00000042872	zinc finger, DHHC-type containing 8a [Source:ZFIN;Acc:ZDB-GENE-091118-26]	0.0151461	1.20755	0.908022	4.95466	3.78614
yipf2	ENSDARG00000021399	Yip1 domain family, member 2 [Source:ZFIN;Acc:ZDB-GENE-040724-124]	0.0152414	0.875097	0.745913	5.15715	4.26673
MPDZ	ENSDARG00000094677	multiple PDZ domain protein [Source:HGNC Symbol;Acc:HGNC:7208]	0.0152414	0.696045	0.62733	5.88971	5.13408
znf143a	ENSDARG00000012887	zinc finger protein 143a [Source:ZFIN;Acc:ZDB-GENE-041114-154]	0.0152504	0.771181	0.67975	5.59297	4.75783
mgst2	ENSDARG00000071345	microsomal glutathione S-transferase 2 [Source:ZFIN;Acc:ZDB-GENE-060616-94]	0.015321	1.06294	0.846234	4.82952	3.75104
zranb2	ENSDARG00000044332	zinc finger, RAN-binding domain containing 2 [Source:ZFIN;Acc:ZDB-GENE-040426-2743]	0.0153274	0.573001	0.533354	6.93392	6.28459
NDUFB1	ENSDARG00000087456	NADH dehydrogenase (ubiquinone) 1 beta subcomplex, 1, 7kDa [Source:HGNC Symbol;Acc:HGNC:7695]	0.0153551	1.87865	1.03789	3.05738	1.2309
rgs9bp	ENSDARG00000009466	regulator of G protein signaling 9 binding protein [Source:ZFIN;Acc:ZDB-GENE-030728-1]	0.0154574	2.59062	1.00094	2.34014	-0.267048
cdk1	ENSDARG00000087554	cyclin-dependent kinase 1 [Source:ZFIN;Acc:ZDB-GENE-010320-1]	0.015506	0.907208	0.764369	5.00683	4.02952
selo	ENSDARG00000041951	selenoprotein O [Source:ZFIN;Acc:ZDB-GENE- 030131-4485]	0.0155509	0.963826	0.795806	4.8212	3.77789
thoc6	ENSDARG00000037966	THO complex 6 [Source:ZFIN;Acc:ZDB-GENE- 041010-198]	0.0156735	1.6218	1.01094	3.64022	1.93765
lin37	ENSDARG00000053950	lin-37 DREAM MuvB core complex component [Source:ZFIN;Acc:ZDB-GENE-050417-446]	0.0157579	1.0499	0.838942	4.99938	3.9496
tmem50a	ENSDARG00000015757	transmembrane protein 50A [Source:ZFIN;Acc:ZDB-GENE-040426-2937]	0.015856	0.936904	0.780563	5.34212	4.37958
utp3	ENSDARG00000056720	UTP3, small subunit (SSU) processome component, homolog (S. cerevisiae) [Source:ZFIN;Acc:ZDB- GENE-040912-163]	0.0159227	0.774895	0.681439	5.63666	4.87998
dpp6b	ENSDARG00000024744	dipeptidyl-peptidase 6b [Source:ZFIN;Acc:ZDB- GENE-070705-88]	0.0159351	0.614427	0.565657	6.5007	5.84375
tm9sf2	ENSDARG00000003866	transmembrane 9 superfamily member 2 [Source:ZFIN;Acc:ZDB-GENE-030131-6302]	0.0159415	0.547061	0.512054	6.94659	6.34454
zfand5a	ENSDARG00000018898	zinc finger, AN1-type domain 5a [Source:ZFIN;Acc:ZDB-GENE-040426-1979]	0.0159814	0.624724	0.573551	6.5723	5.87362
ywhabb	ENSDARG00000075758	tyrosine 3-monooxygenase/tryptophan 5- monooxygenase activation protein, beta polypeptide b [Source:ZFIN;Acc:ZDB-GENE-040426-2160]	0.0160353	0.527574	0.495993	7.19041	6.58815
rabl2	ENSDARG00000063321	RAB, member of RAS oncogene family-like 2 [Source:ZFIN;Acc:ZDB-GENE-060503-464]	0.0160843	1.34138	0.949163	3.96974	2.54581
gngt2a	ENSDARG00000010680	guanine nucleotide binding protein (G protein), gamma transducing activity polypeptide 2a [Source:ZFIN;Acc:ZDB-GENE-030131-7595]	0.0164885	1.67179	1.01364	3.32623	1.5907
p2rx3a	ENSDARG00000010477	purinergic receptor P2X, ligand-gated ion channel, 3a [Source:ZFIN;Acc:ZDB-GENE-000427-3]	0.0165294	1.38702	0.95999	4.22886	2.75066
C12H17orf62	ENSDARG00000071414	chromosome 17 open reading frame 62 [Source:HGNC Symbol;Acc:HGNC:28672]	0.0165294	1.2847	0.93015	4.06144	2.69657
MRPL55	ENSDARG00000043402	mitochondrial ribosomal protein L55 [Source:HGNC Symbol;Acc:HGNC:16686]	0.0165359	1.47255	0.97981	3.9537	2.44398
sccpdhb	ENSDARG00000024564	saccharopine dehydrogenase b [Source:ZFIN;Acc:ZDB-GENE-041010-211]	0.0165359	1.07974	0.850879	4.53393	3.37974
PIN1	ENSDARG00000101915	peptidylprolyl cis/trans isomerase, NIMA- interacting 1 [Source:HGNC Symbol;Acc:HGNC:8988]	0.0165359	0.870108	0.740791	5.30074	4.3581
sms	ENSDARG00000008155	spermine synthase [Source:ZFIN;Acc:ZDB-GENE- 040625-150]	0.0165937	0.672271	0.608795	6.13693	5.39286
fam206a	ENSDARG00000070407	family with sequence similarity 206, member A [Source:ZFIN;Acc:ZDB-GENE-060503-602]	0.0166499	1.62607	1.00675	3.42878	1.85907
auts2b	ENSDARG00000020946	autism susceptibility candidate 2b [Source:ZFIN;Acc:ZDB-GENE-131127-20]	0.0167721	0.819578	0.709403	5.58725	4.71982
tmem38a	ENSDARG00000024047	transmembrane protein 38A [Source:ZFIN;Acc:ZDB-GENE-040426-1888]	0.0167773	0.592129	0.547725	6.59882	5.90722
asmt	ENSDARG00000098249	acetylserotonin O-methyltransferase [Source:ZFIN;Acc:ZDB-GENE-080220-43]	0.0167791	1.41606	0.966169	3.77062	2.29171
prelid1a	ENSDARG00000098671	PRELI domain containing 1a [Source:ZFIN;Acc:ZDB-GENE-040426-1341]	0.0167791	0.829256	0.715429	5.37237	4.50662
srsf3b	ENSDARG00000059360	serine/arginine-rich splicing factor 3b [Source:ZFIN;Acc:ZDB-GENE-071005-2]	0.0167791	0.622289	0.571134	6.28081	5.5867
micall2a	ENSDARG00000102366	mical-like 2a [Source:ZFIN;Acc:ZDB-GENE- 030131-5409]	0.0168475	1.05213	0.837331	4.54639	3.40968
si:ch211-163l21.11	ENSDARG00000095855	si:ch211-163l21.11 [Source:ZFIN;Acc:ZDB-GENE- 110411-142]	0.0170383	1.68406	1.01154	3.35268	1.69293
dynlrb1	ENSDARG00000021582	dynein, light chain, roadblock-type 1 [Source:ZFIN;Acc:ZDB-GENE-040426-989]	0.017135	1.0182	0.820387	4.64326	3.54664
ubfd1	ENSDARG00000102827	ubiquitin family domain containing 1 [Source:ZFIN;Acc:ZDB-GENE-050506-90]	0.0171998	0.862553	0.73527	5.12918	4.21354
sh3d19	ENSDARG00000088202	SH3 domain containing 19 [Source:ZFIN;Acc:ZDB-GENE-050522-481]	0.0172384	0.679203	0.613341	5.98048	5.21389
si:ch73-288o11.5	ENSDARG00000097503	si:ch73-288o11.5 [Source:ZFIN;Acc:ZDB-GENE- 131121-416]	0.0173932	1.08844	0.85266	4.67112	3.53557
scamp3	ENSDARG00000016765	secretory carrier membrane protein 3 [Source:ZFIN;Acc:ZDB-GENE-041114-33]	0.0176469	0.946055	0.782199	4.99743	3.9055
ppardb	ENSDARG00000009473	peroxisome proliferator-activated receptor delta b [Source:ZFIN;Acc:ZDB-GENE-000112-47]	0.017667	0.747121	0.660795	5.67035	4.84904
clgn	ENSDARG00000009315	calmegin [Source:ZFIN;Acc:ZDB-GENE-060929- 708]	0.0176757	0.514142	0.484183	7.14088	6.55145
six1b	ENSDARG00000026473	SIX homeobox 1b [Source:ZFIN;Acc:ZDB-GENE- 040426-2308]	0.0176786	0.964832	0.792083	4.90515	3.8467
chmp1b	ENSDARG00000099624	chromatin modifying protein 1B [Source:ZFIN;Acc:ZDB-GENE-030131-8370]	0.0178683	0.76294	0.671269	5.81684	4.95633
si:ch73-306e8.2	ENSDARG00000097416	si:ch73-306e8.2 [Source:ZFIN;Acc:ZDB-GENE- 131121-409]	0.0178899	3.50236	0.863307	1.64239	-1.9118
eno1b	ENSDARG00000013750	enolase 1b, (alpha) [Source:ZFIN;Acc:ZDB- GENE-040426-1651]	0.0180212	0.89034	0.750423	5.0269	4.06562
si:ch211-153b23.5	ENSDARG00000058206	si:ch211-153b23.5 [Source:ZFIN;Acc:ZDB-GENE- 030131-9744]	0.0180662	1.08966	0.851482	4.88443	3.80412
lim2.4	ENSDARG00000015445	lens intrinsic membrane protein 2.4 [Source:ZFIN;Acc:ZDB-GENE-040718-104]	0.0180662	1.02727	0.822754	4.6728	3.56141
si:ch73-29c22.2	ENSDARG00000094253	si:ch73-29c22.2 [Source:ZFIN;Acc:ZDB-GENE- 091204-199]	0.018068	3.07085	0.915522	1.93672	-1.20428
si:dkey-162h11.3	ENSDARG00000088432	si:dkey-162h11.3 [Source:ZFIN;Acc:ZDB-GENE- 121214-324]	0.018068	0.924733	0.76976	4.89201	3.89555
foxe1	ENSDARG00000079266	forkhead box E1 [Source:ZFIN;Acc:ZDB-GENE- 061116-1]	0.0180993	1.56343	0.989888	3.47029	1.82336
snx19a	ENSDARG00000061101	sorting nexin 19a [Source:ZFIN;Acc:ZDB-GENE- 060526-204]	0.018136	1.19286	0.892896	4.25402	3.01874
stx18	ENSDARG00000035763	syntaxin 18 [Source:ZFIN;Acc:ZDB-GENE-050522- 397]	0.0182125	1.15248	0.877306	4.54659	3.43378
ndufs5	ENSDARG00000006290	NADH dehydrogenase (ubiquinone) Fe-S protein 5 [Source:ZFIN;Acc:ZDB-GENE-050522-437]	0.0184129	0.768141	0.674138	6.49536	5.70651
prdx3	ENSDARG00000032102	peroxiredoxin 3 [Source:ZFIN;Acc:ZDB-GENE- 030826-18]	0.0185765	0.858871	0.731126	5.2208	4.32977
ppiab	ENSDARG00000103994	peptidylprolyl isomerase Ab (cyclophilin A) [Source:ZFIN;Acc:ZDB-GENE-030131-7459]	0.0187041	0.476087	0.451803	7.91765	7.3746
six3b	ENSDARG00000054879	SIX homeobox 3b [Source:ZFIN;Acc:ZDB-GENE- 990415-128]	0.0187244	1.17884	0.88619	4.22349	2.95329
ANKRD66	ENSDARG00000090489	ankyrin repeat domain 66 [Source:HGNC Symbol;Acc:HGNC:44669]	0.0187631	2.26113	1.00481	2.99336	1.05488
CT737210.1	ENSDARG00000101357	No description	0.0187631	6.62611	0.460401	0.0846549	-3.64877
SNORA7	ENSDARG00000082419	Small nucleolar RNA SNORA7 [Source:RFAM;Acc:RF00409]	0.0187751	0.584099	0.540331	6.79793	6.14038
hagh	ENSDARG00000025338	hydroxyacylglutathione hydrolase [Source:ZFIN;Acc:ZDB-GENE-030131-8921]	0.0187837	0.711926	0.635424	5.89979	5.12283
mat2b	ENSDARG00000012932	methionine adenosyltransferase II, beta [Source:ZFIN;Acc:ZDB-GENE-030131-786]	0.0189443	1.02791	0.821222	4.55756	3.4776
tbc1d14	ENSDARG00000003520	TBC1 domain family, member 14 [Source:ZFIN;Acc:ZDB-GENE-030131-6136]	0.0189443	0.903518	0.756422	5.27434	4.24603
lrtm2b	ENSDARG00000045811	leucine-rich repeats and transmembrane domains 2b [Source:ZFIN;Acc:ZDB-GENE-131121-544]	0.0189917	2.95037	0.9264	2.27072	0.707931
ora4	ENSDARG00000078223	olfactory receptor class A related 4 [Source:ZFIN;Acc:ZDB-GENE-100721-6]	0.0189917	5.70624	0.76173	1.33058	-3.07277
ttyh2l	ENSDARG00000010727	tweety homolog 2, like [Source:ZFIN;Acc:ZDB- GENE-040426-2394]	0.0190166	0.906662	0.758118	5.00714	4.03838
rnf181	ENSDARG00000023958	ring finger protein 181 [Source:ZFIN;Acc:ZDB- GENE-040426-1024]	0.0190504	1.28993	0.922906	4.05332	3.04664
slc43a1a	ENSDARG00000037393	solute carrier family 43 (amino acid system L transporter), member 1a [Source:ZFIN;Acc:ZDB-GENE-030131- 6327]	0.0190504	0.783566	0.683483	5.74402	4.93141
si:ch211-286h12.6	ENSDARG00000097178	si:ch211-286h12.6 [Source:ZFIN;Acc:ZDB-GENE- 131127-335]	0.0191132	3.04666	0.910897	2.77579	1.80273
ube2d1a	ENSDARG00000029107	ubiquitin-conjugating enzyme E2D 1a [Source:ZFIN;Acc:ZDB-GENE-040426-1609]	0.0191537	1.59986	0.990373	3.36514	1.6864
ttll9	ENSDARG00000062806	tubulin tyrosine ligase-like family, member 9 [Source:ZFIN;Acc:ZDB-GENE-030131-1582]	0.0193318	1.98066	1.01279	3.01468	1.13663
tekt1	ENSDARG00000101331	tektin 1 [Source:ZFIN;Acc:ZDB-GENE-041114- 99]	0.0193424	1.97766	1.01086	3.06253	1.20261
zgc:174164	ENSDARG00000057138	zgc:174164 [Source:ZFIN;Acc:ZDB-GENE-030131- 4971]	0.019429	0.956481	0.784439	4.93977	3.93784
smarcb1a	ENSDARG00000033647	SWI/SNF related, matrix associated, actin dependent regulator of chromatin, subfamily b, member 1a [Source:ZFIN;Acc:ZDB-GENE-041114-5]	0.019429	0.74925	0.66043	5.62356	4.78591
glmnb	ENSDARG00000010958	glomulin, FKBP associated protein b [Source:ZFIN;Acc:ZDB-GENE-080723-14]	0.0194911	1.15993	0.876721	4.4537	3.33413
cacnb2b	ENSDARG00000055565	calcium channel, voltage-dependent, beta 2b [Source:ZFIN;Acc:ZDB-GENE-050208-129]	0.0196586	0.795924	0.690806	5.84748	4.96303
erh	ENSDARG00000032866	enhancer of rudimentary homolog (Drosophila) [Source:ZFIN;Acc:ZDB-GENE-990415-57]	0.0197963	0.729519	0.646703	5.64026	4.83625
krtcap2	ENSDARG00000070386	keratinocyte associated protein 2 [Source:ZFIN;Acc:ZDB-GENE-060825-91]	0.0198163	2.22566	1.00086	2.56117	0.249163
slc13a3	ENSDARG00000069478	solute carrier family 13 (sodium-dependent dicarboxylate transporter), member 3 [Source:ZFIN;Acc:ZDB- GENE-040426-2486]	0.0198254	1.22083	0.897733	4.41233	3.19536
diabloa	ENSDARG00000104172	diablo, IAP-binding mitochondrial protein a [Source:ZFIN;Acc:ZDB-GENE-040426-1303]	0.0198362	0.902542	0.754497	5.01043	4.02782
C19H6orf62	ENSDARG00000093406	chromosome 6 open reading frame 62 [Source:HGNC Symbol;Acc:HGNC:20998]	0.0199178	0.46089	0.438445	7.76772	7.21889
fezf2	ENSDARG00000070677	FEZ family zinc finger 2 [Source:ZFIN;Acc:ZDB-GENE-001103-3]	0.0199423	1.4547	0.961188	4.11153	2.75166
znf395a	ENSDARG00000060113	zinc finger protein 395a [Source:ZFIN;Acc:ZDB-GENE-061215-52]	0.0200054	0.696562	0.623551	5.9166	5.1334
serinc1	ENSDARG00000009106	serine incorporator 1 [Source:ZFIN;Acc:ZDB- GENE-030131-4415]	0.0200441	0.555306	0.51683	6.67483	6.04723
calm3b	ENSDARG00000074057	calmodulin 3b (phosphorylase kinase, delta) [Source:ZFIN;Acc:ZDB-GENE-030131-527]	0.02017	0.443607	0.42346	9.61778	9.09345
rer1	ENSDARG00000012747	retention in endoplasmic reticulum sorting receptor 1 [Source:ZFIN;Acc:ZDB-GENE-040426-1494]	0.0202269	0.724726	0.643003	5.65625	4.84406
ABCA7	ENSDARG00000074221	ATP-binding cassette, sub-family A (ABC1), member 7 [Source:HGNC Symbol;Acc:HGNC:37]	0.0202456	0.742741	0.655235	5.64221	4.84306
phlda3	ENSDARG00000037804	pleckstrin homology-like domain, family A, member 3 [Source:ZFIN;Acc:ZDB-GENE-030616-267]	0.0203285	2.04746	1.00398	2.85681	0.808748
snrpd3l	ENSDARG00000076283	small nuclear ribonucleoprotein D3 polypeptide, like [Source:ZFIN;Acc:ZDB-GENE-030131-5219]	0.0205392	0.946081	0.777004	5.28468	4.32977
ost4	ENSDARG00000096118	oligosaccharyltransferase 4 homolog (S. cerevisiae) [Source:ZFIN;Acc:ZDB-GENE-110307-1]	0.0206134	2.31978	0.987368	2.73928	0.580645
zgc:113263	ENSDARG00000045842	zgc:113263 [Source:ZFIN;Acc:ZDB-GENE-050306- 34]	0.0206134	0.84117	0.717663	5.62161	4.85652
rpl39	ENSDARG00000036316	ribosomal protein L39 [Source:ZFIN;Acc:ZDB- GENE-040625-51]	0.0206134	0.574226	0.531626	6.81045	6.16462
etv5b	ENSDARG00000044511	ets variant 5b [Source:ZFIN;Acc:ZDB-GENE- 991228-4]	0.0206389	0.735272	0.64985	6.37558	5.59834
f9a	ENSDARG00000010097	coagulation factor IXa [Source:ZFIN;Acc:ZDB- GENE-030714-2]	0.0207057	4.68354	0.73916	1.26927	-3.49676
fam228a	ENSDARG00000042936	family with sequence similarity 228, member A [Source:ZFIN;Acc:ZDB-GENE-041014-83]	0.0207242	2.32662	0.983252	2.74246	0.425981
C9H2orf69	ENSDARG00000062425	chromosome 2 open reading frame 69 [Source:HGNC Symbol;Acc:HGNC:26799]	0.0209337	1.79909	0.999136	3.18269	1.28436
cdipt	ENSDARG00000070686	CDP-diacylglycerol--inositol 3- phosphatidyltransferase (phosphatidylinositol synthase) [Source:ZFIN;Acc:ZDB-GENE-040426-2536]	0.020941	0.782957	0.681066	5.37063	4.49188
DYNLRB1 (2 of 2)	ENSDARG00000104233	dynein, light chain, roadblock-type 1 [Source:HGNC Symbol;Acc:HGNC:15468]	0.0209913	0.81781	0.703009	5.23297	4.34501
kat5b	ENSDARG00000045951	K(lysine) acetyltransferase 5b [Source:ZFIN;Acc:ZDB-GENE-030131-985]	0.0212709	0.904184	0.753251	5.33844	4.36539
si:ch211-202h22.7	ENSDARG00000073912	si:ch211-202h22.7 [Source:ZFIN;Acc:ZDB-GENE- 090313-77]	0.0215534	2.9106	0.893345	2.39933	-1.59309
ccz1	ENSDARG00000056559	CCZ1 vacuolar protein trafficking and biogenesis associated homolog (S. cerevisiae) [Source:ZFIN;Acc:ZDB-GENE-040426-698]	0.0215555	0.697014	0.622691	6.17319	5.39721
tnni2b.2	ENSDARG00000029995	troponin I type 2b (skeletal, fast), tandem duplicate 2 [Source:ZFIN;Acc:ZDB-GENE-040801-9]	0.0216151	0.604513	0.554693	7.454	6.80323
nop16	ENSDARG00000044402	NOP16 nucleolar protein homolog (yeast) [Source:ZFIN;Acc:ZDB-GENE-040718-267]	0.0216244	0.920826	0.761928	4.83223	3.83496
hspb1	ENSDARG00000041065	heat shock protein, alpha-crystallin- related, 1 [Source:ZFIN;Acc:ZDB-GENE-030326-4]	0.0216657	1.39068	0.940653	4.22512	2.84998
romo1	ENSDARG00000038076	reactive oxygen species modulator 1 [Source:ZFIN;Acc:ZDB-GENE-040426-1768]	0.0216657	0.846646	0.71966	5.65167	4.82261
mrps16	ENSDARG00000098972	mitochondrial ribosomal protein S16 [Source:ZFIN;Acc:ZDB-GENE-041010-123]	0.0217878	1.07161	0.835114	4.5275	3.30482
zc3h13	ENSDARG00000037177	zinc finger CCCH-type containing 13 [Source:ZFIN;Acc:ZDB-GENE-040426-1619]	0.0218765	0.499096	0.470214	7.56635	6.98319
tnnc2	ENSDARG00000070835	troponin C type 2 (fast) [Source:ZFIN;Acc:ZDB-GENE-000322-2]	0.0219176	0.395309	0.380636	10.4894	10.0226
tfa	ENSDARG00000016771	transferrin-a [Source:ZFIN;Acc:ZDB-GENE- 980526-35]	0.0220099	0.40148	0.386113	9.8333	9.36583
srsf5a	ENSDARG00000029818	serine/arginine-rich splicing factor 5a [Source:ZFIN;Acc:ZDB-GENE-030131-7336]	0.0220118	0.480849	0.454876	7.76964	7.18561
pcbd1	ENSDARG00000031981	pterin-4 alpha-carbinolamine dehydratase/dimerization cofactor of hepatocyte nuclear factor 1 alpha [Source:ZFIN;Acc:ZDB-GENE-040426-1787]	0.0220237	1.19321	0.882262	4.13724	2.83078
psmc4	ENSDARG00000027099	proteasome (prosome, macropain) 26S subunit, ATPase, 4 [Source:ZFIN;Acc:ZDB-GENE-030131-5083]	0.022039	0.511831	0.480712	7.5451	6.95241
irf2	ENSDARG00000040465	interferon regulatory factor 2 [Source:ZFIN;Acc:ZDB-GENE-041212-38]	0.022149	0.939738	0.771147	4.76016	3.75496
gatsl2	ENSDARG00000018985	GATS protein-like 2 [Source:ZFIN;Acc:ZDB- GENE-030131-5505]	0.0222735	0.716869	0.635904	5.68699	4.91842
fam43a	ENSDARG00000043009	family with sequence similarity 43, member A [Source:ZFIN;Acc:ZDB-GENE-030131-6098]	0.0222736	0.696981	0.622107	5.7412	4.97511
ccdc113	ENSDARG00000006981	coiled-coil domain containing 113 [Source:ZFIN;Acc:ZDB-GENE-041010-163]	0.0223415	2.77588	0.899866	3.28081	2.43436
CU929126.1	ENSDARG00000102443	No description	0.0223905	1.62406	0.977178	4.09271	2.64781
MPP4 (1 of 2)	ENSDARG00000009386	membrane protein, palmitoylated 4 (MAGUK p55 subfamily member 4) [Source:HGNC Symbol;Acc:HGNC:13680]	0.0225077	1.9266	0.993927	2.89641	0.924411
si:ch211-105j21.9	ENSDARG00000097845	si:ch211-105j21.9 [Source:ZFIN;Acc:ZDB-GENE- 131127-499]	0.0225077	1.42494	0.94513	3.92884	2.5092
fam107b	ENSDARG00000026865	family with sequence similarity 107, member B [Source:ZFIN;Acc:ZDB-GENE-031030-12]	0.0225077	0.66061	0.595989	6.18241	5.46006
igsf9a	ENSDARG00000075864	immunoglobulin superfamily, member 9a [Source:ZFIN;Acc:ZDB-GENE-060503-288]	0.022665	0.524381	0.490795	6.9155	6.32159
cbx7a	ENSDARG00000038025	chromobox homolog 7a [Source:ZFIN;Acc:ZDB- GENE-050417-400]	0.022835	0.859413	0.725722	5.15667	4.22091
sec22bb	ENSDARG00000100435	SEC22 vesicle trafficking protein homolog B (S. cerevisiae), b [Source:ZFIN;Acc:ZDB-GENE-030131-5488]	0.0228451	0.813874	0.698466	5.18465	4.30168
agbl2	ENSDARG00000079983	ATP/GTP binding protein-like 2 [Source:ZFIN;Acc:ZDB-GENE-070719-6]	0.022928	1.88358	0.991395	2.9749	1.00464
anxa3b	ENSDARG00000044254	annexin A3b [Source:ZFIN;Acc:ZDB-GENE-041114- 128]	0.0229524	0.856146	0.723654	5.02125	4.10964
plch2b	ENSDARG00000056805	phospholipase C, eta 2b [Source:ZFIN;Acc:ZDB- GENE-101112-1]	0.0230576	1.06405	0.829125	4.70264	3.78519
pdha1b	ENSDARG00000010555	pyruvate dehydrogenase (lipoamide) alpha 1b [Source:ZFIN;Acc:ZDB-GENE-040718-96]	0.023075	1.69683	0.980974	3.85797	2.53712
ube2ia	ENSDARG00000052649	ubiquitin-conjugating enzyme E2Ia [Source:ZFIN;Acc:ZDB-GENE-010607-1]	0.0230831	0.76599	0.667966	5.4537	4.61193
si:dkey-153k10.9	ENSDARG00000004386	si:dkey-153k10.9 [Source:ZFIN;Acc:ZDB-GENE- 030131-3893]	0.0230888	0.617039	0.56339	6.45949	5.78386
atpif1b	ENSDARG00000044092	ATPase inhibitory factor 1b [Source:ZFIN;Acc:ZDB-GENE-050506-113]	0.0231848	0.59632	0.547572	6.48498	5.8217
prosc	ENSDARG00000060288	proline synthetase co-transcribed homolog (bacterial) [Source:ZFIN;Acc:ZDB-GENE-030131-1378]	0.0232054	0.761915	0.66519	5.39094	4.57091
CCDC176 (1 of 2)	ENSDARG00000062924	coiled-coil domain containing 176 [Source:HGNC Symbol;Acc:HGNC:19855]	0.0232564	1.919	0.987111	3.14205	1.34736
si:dkey-266m15.7	ENSDARG00000093117	si:dkey-266m15.7 [Source:ZFIN;Acc:ZDB-GENE- 070705-444]	0.0234518	2.41045	0.954294	3.99952	2.84407
elp6	ENSDARG00000060445	elongator acetyltransferase complex subunit 6 [Source:ZFIN;Acc:ZDB-GENE-060825-249]	0.023544	1.56227	0.965716	3.39933	1.82426
rpl23	ENSDARG00000053457	ribosomal protein L23 [Source:ZFIN;Acc:ZDB- GENE-030131-8756]	0.023565	0.553623	0.514023	7.37876	6.74717
zgc:194990	ENSDARG00000069407	zgc:194990 [Source:ZFIN;Acc:ZDB-GENE-081022- 171]	0.02362	1.20901	0.883164	4.56374	3.40993
COL23A1	ENSDARG00000089078	collagen, type XXIII, alpha 1 [Source:HGNC Symbol;Acc:HGNC:22990]	0.0237125	1.0059	0.801481	4.70031	3.59486
dclk3	ENSDARG00000078997	doublecortin-like kinase 3 [Source:ZFIN;Acc:ZDB-GENE-081104-224]	0.0237341	2.17937	0.978673	2.55884	0.530877
psenen	ENSDARG00000068698	presenilin enhancer gamma secretase subunit [Source:ZFIN;Acc:ZDB-GENE-040218-1]	0.0238646	1.18812	0.87575	4.11891	2.90257
zgc:109965	ENSDARG00000012126	zgc:109965 [Source:ZFIN;Acc:ZDB-GENE-050913- 21]	0.023886	1.40226	0.935281	3.94975	2.47155
polr2gl	ENSDARG00000056127	polymerase (RNA) II (DNA directed) polypeptide G-like [Source:ZFIN;Acc:ZDB-GENE-030131-2808]	0.023886	0.974299	0.785868	4.88157	3.84
polb	ENSDARG00000003749	polymerase (DNA directed), beta [Source:ZFIN;Acc:ZDB-GENE-040830-1]	0.023886	0.711787	0.6311	5.62326	4.84527
g6pca.2	ENSDARG00000013721	glucose-6-phosphatase a, catalytic subunit, tandem duplicate 2 [Source:ZFIN;Acc:ZDB-GENE-050309-17]	0.0238929	0.553379	0.513677	7.37866	6.76143
psmc3	ENSDARG00000007141	proteasome (prosome, macropain) 26S subunit, ATPase, 3 [Source:ZFIN;Acc:ZDB-GENE-030131-666]	0.024047	0.561734	0.520232	6.62057	5.98942
tpt1	ENSDARG00000092693	tumor protein, translationally-controlled 1 [Source:ZFIN;Acc:ZDB-GENE-990603-10]	0.0240713	0.413253	0.396147	9.53835	9.05447
waca	ENSDARG00000012577	WW domain containing adaptor with coiled- coil a [Source:ZFIN;Acc:ZDB-GENE-030131-2624]	0.0242574	0.479606	0.453195	7.45557	6.89796
zgc:136220	ENSDARG00000036140	zgc:136220 [Source:ZFIN;Acc:ZDB-GENE-070410- 2]	0.0242962	0.764771	0.666029	5.44223	4.60912
si:ch211-133n4.6	ENSDARG00000092099	si:ch211-133n4.6 [Source:ZFIN;Acc:ZDB-GENE- 060503-571]	0.0243454	0.919197	0.756937	4.83819	3.85281
si:ch1073-303d10.1	ENSDARG00000103006	si:ch1073-303d10.1 [Source:ZFIN;Acc:ZDB-GENE- 141216-327]	0.0245086	1.66	0.9725	3.19343	1.56788
eny2	ENSDARG00000070046	enhancer of yellow 2 homolog (Drosophila) [Source:ZFIN;Acc:ZDB-GENE-040718-124]	0.0245901	1.51577	0.954143	3.53735	1.93842
rpl36	ENSDARG00000100588	ribosomal protein L36 [Source:ZFIN;Acc:ZDB- GENE-040622-2]	0.0246648	0.453044	0.43056	8.51416	7.99803
gpx1b	ENSDARG00000006207	glutathione peroxidase 1b [Source:ZFIN;Acc:ZDB-GENE-040912-60]	0.0246661	1.69173	0.974666	3.17037	1.41013
ctbp2a	ENSDARG00000044062	C-terminal binding protein 2a [Source:ZFIN;Acc:ZDB-GENE-010130-2]	0.0246953	0.596367	0.546864	6.36476	5.68635
SIK1	ENSDARG00000058606	salt-inducible kinase 1 [Source:HGNC Symbol;Acc:HGNC:11142]	0.0246958	0.688159	0.61412	6.39186	5.59474
ccdc88aa	ENSDARG00000078440	coiled-coil domain containing 88Aa [Source:ZFIN;Acc:ZDB-GENE-100701-2]	0.0248035	0.732463	0.644358	5.68356	4.89186
rtf1	ENSDARG00000008947	Rtf1, Paf1/RNA polymerase II complex component, homolog (S. cerevisiae) [Source:ZFIN;Acc:ZDB- GENE-030131-6778]	0.0248035	0.439307	0.418712	7.88387	7.35646
ptgr1	ENSDARG00000024877	prostaglandin reductase 1 [Source:ZFIN;Acc:ZDB-GENE-041212-80]	0.0248067	0.837022	0.710159	5.23223	4.34848
rpl32	ENSDARG00000054818	ribosomal protein L32 [Source:ZFIN;Acc:ZDB- GENE-060331-105]	0.0248067	0.523375	0.489215	7.51285	6.91935
psma8	ENSDARG00000010965	proteasome (prosome, macropain) subunit, alpha type, 8 [Source:ZFIN;Acc:ZDB-GENE-040426-2194]	0.0248067	0.517919	0.484767	7.05416	6.45772
celf1	ENSDARG00000005315	cugbp, Elav-like family member 1 [Source:ZFIN;Acc:ZDB-GENE-000501-1]	0.0248481	0.500594	0.470515	7.22387	6.64476
celf3b	ENSDARG00000006983	cugbp, Elav-like family member 3b [Source:ZFIN;Acc:ZDB-GENE-110408-50]	0.0248491	0.867583	0.727759	5.33996	4.42483
trmt112	ENSDARG00000071878	tRNA methyltransferase 11-2 homolog (S. cerevisiae) [Source:ZFIN;Acc:ZDB-GENE-050522-30]	0.0249184	1.24767	0.89218	4.10082	2.81266
ift57	ENSDARG00000021022	intraflagellar transport 57 homolog (Chlamydomonas) [Source:ZFIN;Acc:ZDB-GENE-040614-1]	0.0249184	0.955108	0.774539	4.80613	3.79112
rnf144ab	ENSDARG00000042557	ring finger protein 144ab [Source:ZFIN;Acc:ZDB-GENE-040718-486]	0.0249195	1.09797	0.839259	4.26057	3.08789
si:dkey-245f22.5	ENSDARG00000102967	si:dkey-245f22.5 [Source:ZFIN;Acc:ZDB-GENE- 141216-476]	0.0249825	2.66165	0.915022	6.63875	4.69303
eif4a2	ENSDARG00000016477	eukaryotic translation initiation factor 4A, isoform 2 [Source:ZFIN;Acc:ZDB-GENE-040426-2802]	0.0250289	0.755438	0.659271	5.55503	4.75722
kansl2	ENSDARG00000056318	KAT8 regulatory NSL complex subunit 2 [Source:ZFIN;Acc:ZDB-GENE-041010-67]	0.0250322	0.683053	0.610261	5.7554	5.00048
nfkb2	ENSDARG00000038687	nuclear factor of kappa light polypeptide gene enhancer in B-cells 2 (p49/p100) [Source:ZFIN;Acc:ZDB- GENE-030131-6701]	0.02505	0.636593	0.576825	6.05449	5.35005
btc	ENSDARG00000098112	betacellulin, epidermal growth factor family member [Source:ZFIN;Acc:ZDB-GENE-050311-1]	0.0251296	1.2003	0.876414	4.21421	2.81586
arrdc3a	ENSDARG00000052690	arrestin domain containing 3a [Source:ZFIN;Acc:ZDB-GENE-030131-2913]	0.0251296	0.618973	0.563702	6.46698	5.77381
si:dkeyp-117h8.2	ENSDARG00000011602	si:dkeyp-117h8.2 [Source:ZFIN;Acc:ZDB-GENE- 041210-321]	0.0255307	0.550766	0.510941	6.99884	6.39347
si:dkey-121a11.3	ENSDARG00000071458	si:dkey-121a11.3 [Source:ZFIN;Acc:ZDB-GENE- 050208-417]	0.0255405	0.81407	0.695575	5.22989	4.36437
cyb5r2	ENSDARG00000051925	cytochrome b5 reductase 2 [Source:ZFIN;Acc:ZDB-GENE-060825-83]	0.0255405	0.786693	0.678743	5.36221	4.51022
fxyd1	ENSDARG00000099014	FXYD domain containing ion transport regulator 1 (phospholemman) [Source:ZFIN;Acc:ZDB-GENE- 050309-14]	0.0255531	0.795532	0.68423	5.66711	4.81581
SIL1	ENSDARG00000100564	SIL1 nucleotide exchange factor [Source:HGNC Symbol;Acc:HGNC:24624]	0.0255871	0.971028	0.781379	4.87643	3.80133
pdk4	ENSDARG00000054848	pyruvate dehydrogenase kinase, isozyme 4 [Source:ZFIN;Acc:ZDB-GENE-060503-754]	0.0255973	0.495585	0.46614	7.6049	7.07868
nxt2	ENSDARG00000061527	nuclear transport factor 2-like export factor 2 [Source:ZFIN;Acc:ZDB-GENE-050521-1]	0.025601	1.4343	0.936317	3.82589	2.4908
C8H1orf194	ENSDARG00000034457	chromosome 1 open reading frame 194 [Source:HGNC Symbol;Acc:HGNC:32331]	0.0256108	3.35117	0.792404	4.41005	2.72704
SLC1A5	ENSDARG00000099186	solute carrier family 1 (neutral amino acid transporter), member 5 [Source:HGNC Symbol;Acc:HGNC:10943]	0.0256371	0.569981	0.526002	6.69555	6.05411
CU856539.4	ENSDARG00000090886	Uncharacterized protein [Source:UniProtKB/TrEMBL;Acc:E7F538]	0.0256428	1.72435	0.97183	3.13103	1.33945
nmbb	ENSDARG00000077167	neuromedin Bb [Source:ZFIN;Acc:ZDB-GENE- 081022-31]	0.0256838	3.03419	0.865233	1.77967	-1.3358
CR450842.1	ENSDARG00000070506	Uncharacterized protein [Source:UniProtKB/TrEMBL;Acc:F1QNH0]	0.025685	1.39431	0.92774	3.65528	2.17316
chka	ENSDARG00000041078	choline kinase alpha [Source:ZFIN;Acc:ZDB- GENE-050208-149]	0.025685	0.577265	0.531647	6.50137	5.85832
zgc:77849	ENSDARG00000012458	zgc:77849 [Source:ZFIN;Acc:ZDB-GENE-030131- 1107]	0.0256857	0.567866	0.524327	6.47064	5.83405
tmem69	ENSDARG00000076017	transmembrane protein 69 [Source:ZFIN;Acc:ZDB-GENE-081022-98]	0.025689	2.01733	0.974367	2.70592	0.6272
sdhc	ENSDARG00000038608	succinate dehydrogenase complex, subunit C, integral membrane protein [Source:ZFIN;Acc:ZDB-GENE-040801- 26]	0.0257478	1.06258	0.822885	4.49221	3.33989
HSPB11	ENSDARG00000067777	heat shock protein family B (small), member 11 [Source:HGNC Symbol;Acc:HGNC:25019]	0.0257881	2.62103	0.919911	3.22	1.48033
riok2	ENSDARG00000035264	RIO kinase 2 (yeast) [Source:ZFIN;Acc:ZDB- GENE-040426-2913]	0.0258283	0.943243	0.767073	5.23103	4.20227
si:dkey-17e16.15	ENSDARG00000094217	si:dkey-17e16.15 [Source:ZFIN;Acc:ZDB-GENE- 091204-295]	0.0258938	1.87736	0.975914	2.88486	1.22884
tspan7b	ENSDARG00000008407	tetraspanin 7b [Source:ZFIN;Acc:ZDB-GENE- 040927-5]	0.0259879	0.564047	0.521216	6.60624	5.97884
rbm4.3	ENSDARG00000022129	RNA binding motif protein 4.3 [Source:ZFIN;Acc:ZDB-GENE-040426-1938]	0.0260499	0.552522	0.512097	6.74545	6.12459
si:dkey-288a3.2	ENSDARG00000089780	si:dkey-288a3.2 [Source:ZFIN;Acc:ZDB-GENE- 131127-351]	0.0260822	2.03543	0.972028	2.67411	0.6272
wu:fb55g09	ENSDARG00000088449	wu:fb55g09 [Source:ZFIN;Acc:ZDB-GENE-030131- 1009]	0.0261101	0.558981	0.517173	6.71296	6.06337
TTF1 (6 of 6)	ENSDARG00000094107	transcription termination factor, RNA polymerase I [Source:HGNC Symbol;Acc:HGNC:12397]	0.0261338	1.13282	0.849961	4.55081	3.46127
eif3s6ip	ENSDARG00000101082	eukaryotic translation initiation factor 3, subunit 6 interacting protein [Source:ZFIN;Acc:ZDB-GENE- 040426-2138]	0.0262394	0.47628	0.449847	7.6335	7.10009
nxnl2	ENSDARG00000003934	nucleoredoxin-like 2 [Source:ZFIN;Acc:ZDB- GENE-041212-55]	0.0266385	1.46701	0.938659	3.45133	1.92598
ier5l	ENSDARG00000054906	immediate early response 5-like [Source:ZFIN;Acc:ZDB-GENE-030131-5134]	0.0266587	0.8069	0.690021	5.28421	4.41243
ctrb1	ENSDARG00000090428	chymotrypsinogen B1 [Source:ZFIN;Acc:ZDB- GENE-030131-1171]	0.0268125	0.592076	0.54254	7.62648	6.9558
C5HXorf56	ENSDARG00000067981	chromosome X open reading frame 56 [Source:HGNC Symbol;Acc:HGNC:26239]	0.026882	1.01959	0.802067	4.61448	3.54348
ptpreb	ENSDARG00000021151	protein tyrosine phosphatase, receptor type, E, b [Source:ZFIN;Acc:ZDB-GENE-060503-263]	0.0268881	0.793388	0.681543	5.40279	4.52756
fam213b	ENSDARG00000029795	family with sequence similarity 213, member B [Source:ZFIN;Acc:ZDB-GENE-040426-2556]	0.0269383	0.943177	0.765454	4.69174	3.69536
chst10	ENSDARG00000031632	carbohydrate sulfotransferase 10 [Source:ZFIN;Acc:ZDB-GENE-040808-40]	0.0269907	0.873177	0.72824	4.97312	4.04904
dusp22b	ENSDARG00000039850	dual specificity phosphatase 22b [Source:ZFIN;Acc:ZDB-GENE-050417-257]	0.0270509	1.92657	0.969751	2.79076	0.808748
bhlhe23	ENSDARG00000037588	basic helix-loop-helix family, member e23 [Source:ZFIN;Acc:ZDB-GENE-050913-22]	0.0270562	1.50724	0.943452	3.49304	1.93842
2022-03-01	ENSDARG00000037487	membrane-associated ring finger (C3HC4) 1 [Source:ZFIN;Acc:ZDB-GENE-081112-1]	0.0270562	1.01188	0.798151	4.63957	3.60606
six7	ENSDARG00000070107	SIX homeobox 7 [Source:ZFIN;Acc:ZDB-GENE- 990825-28]	0.0271307	0.852577	0.716417	4.96247	4.03809
mdh2	ENSDARG00000043371	malate dehydrogenase 2, NAD (mitochondrial) [Source:ZFIN;Acc:ZDB-GENE-040426-2143]	0.0273316	0.504323	0.472836	7.27389	6.70228
cfap43	ENSDARG00000001825	cilia and flagella associated protein 43 [Source:ZFIN;Acc:ZDB-GENE-080815-3]	0.027415	1.43111	0.929201	4.00342	2.46805
C5H11orf53 (1 of 2)	ENSDARG00000013051	chromosome 11 open reading frame 53 [Source:HGNC Symbol;Acc:HGNC:30527]	0.0276148	3.45672	0.758539	1.29217	-0.704283
ppig	ENSDARG00000044431	peptidylprolyl isomerase G (cyclophilin G) [Source:ZFIN;Acc:ZDB-GENE-040426-2822]	0.0276599	0.588355	0.53931	6.50761	5.84856
gipc3	ENSDARG00000053074	GIPC PDZ domain containing family, member 3 [Source:ZFIN;Acc:ZDB-GENE-060616-326]	0.0277989	2.2758	0.946926	2.3861	0.0144199
si:ch211-85n16.3	ENSDARG00000096346	si:ch211-85n16.3 [Source:ZFIN;Acc:ZDB-GENE- 120215-137]	0.0278615	2.33022	0.939673	2.38312	-0.0433187
apoda.2	ENSDARG00000060350	apolipoprotein Da, duplicate 2 [Source:ZFIN;Acc:ZDB-GENE-070912-551]	0.0280851	0.817754	0.69516	5.49149	4.57957
nfyc	ENSDARG00000070151	nuclear transcription factor Y, gamma [Source:ZFIN;Acc:ZDB-GENE-030131-2165]	0.0283937	0.517479	0.48327	6.80576	6.20884
si:ch73-44m9.2	ENSDARG00000094821	si:ch73-44m9.2 [Source:ZFIN;Acc:ZDB-GENE- 081031-72]	0.0284026	2.88683	0.858645	2.04765	-0.48558
ABCC8 (2 of 2)	ENSDARG00000077007	ATP-binding cassette, sub-family C (CFTR/MRP), member 8 [Source:HGNC Symbol;Acc:HGNC:59]	0.0284163	1.67941	0.956197	3.75443	2.10857
ppiaa	ENSDARG00000009212	peptidylprolyl isomerase Aa (cyclophilin A) [Source:ZFIN;Acc:ZDB-GENE-030131-8556]	0.0284926	0.504388	0.472579	7.67644	7.10473
her6	ENSDARG00000006514	hairy-related 6 [Source:ZFIN;Acc:ZDB-GENE- 980526-144]	0.0285533	1.06184	0.817383	4.53133	3.40701
GUCA1A (1 of 2)	ENSDARG00000100747	guanylate cyclase activator 1A (retina) [Source:HGNC Symbol;Acc:HGNC:4678]	0.0285645	1.62512	0.952587	3.17643	1.47888
atp5g3a	ENSDARG00000017775	ATP synthase, H+ transporting, mitochondrial Fo complex, subunit C3 (subunit 9), genome duplicate a [Source:ZFIN;Acc:ZDB-GENE-040426-857]	0.0286774	0.767689	0.663912	5.71485	4.89302
mrps36	ENSDARG00000079823	mitochondrial ribosomal protein S36 [Source:ZFIN;Acc:ZDB-GENE-081104-343]	0.0286871	1.02155	0.799961	4.43205	3.49031
h2afva	ENSDARG00000068820	H2A histone family, member Va [Source:ZFIN;Acc:ZDB-GENE-020717-1]	0.0286877	1.06854	0.819981	4.46151	3.36261
ttc5	ENSDARG00000013329	tetratricopeptide repeat domain 5 [Source:ZFIN;Acc:ZDB-GENE-050417-137]	0.0287485	1.14387	0.848673	4.15596	2.94274
otx2	ENSDARG00000011235	orthodenticle homeobox 2 [Source:ZFIN;Acc:ZDB-GENE-980526-406]	0.0288752	0.846302	0.710984	5.49622	4.59093
polr1d	ENSDARG00000037570	polymerase (RNA) I polypeptide D [Source:ZFIN;Acc:ZDB-GENE-040930-4]	0.028889	0.886962	0.733548	4.87488	3.9053
dnaja2	ENSDARG00000104066	DnaJ (Hsp40) homolog, subfamily A, member 2 [Source:ZFIN;Acc:ZDB-GENE-040426-2884]	0.028889	0.493724	0.463689	7.38424	6.82507
si:dkey-4p15.5	ENSDARG00000086272	si:dkey-4p15.5 [Source:ZFIN;Acc:ZDB-GENE- 121214-193]	0.0289485	0.959775	0.770848	4.638	3.61689
smyd2a	ENSDARG00000055151	SET and MYND domain containing 2a [Source:ZFIN;Acc:ZDB-GENE-050320-126]	0.0289503	0.694831	0.615753	6.19683	5.43249
med15	ENSDARG00000014292	mediator complex subunit 15 [Source:ZFIN;Acc:ZDB-GENE-040426-2032]	0.0289751	0.904278	0.74266	4.95149	4.00306
mfsd6a	ENSDARG00000032318	major facilitator superfamily domain containing 6a [Source:ZFIN;Acc:ZDB-GENE-050208-335]	0.0289803	1.08047	0.824142	4.28139	3.12109
dkk3a	ENSDARG00000103591	dickkopf WNT signaling pathway inhibitor 3a [Source:ZFIN;Acc:ZDB-GENE-110519-1]	0.028994	0.958534	0.770156	4.76793	3.7182
fabp2	ENSDARG00000006427	fatty acid binding protein 2, intestinal [Source:ZFIN;Acc:ZDB-GENE-991019-5]	0.0292314	0.405586	0.388547	9.24651	8.76668
rpl14	ENSDARG00000103433	ribosomal protein L14 [Source:ZFIN;Acc:ZDB- GENE-030131-2085]	0.0292522	0.455892	0.43195	8.66915	8.14473
spns1	ENSDARG00000011925	spinster homolog 1 (Drosophila) [Source:ZFIN;Acc:ZDB-GENE-020228-1]	0.0292594	0.720447	0.632808	5.80482	5.00361
lamp1	ENSDARG00000092610	lysosomal-associated membrane protein 1 [Source:ZFIN;Acc:ZDB-GENE-030131-9303]	0.0292864	1.08438	0.825044	4.40964	3.30081
pgrmc2	ENSDARG00000030237	progesterone receptor membrane component 2 [Source:ZFIN;Acc:ZDB-GENE-040426-2102]	0.029403	0.627246	0.567605	6.00447	5.29576
lrit2	ENSDARG00000030626	leucine-rich repeat, immunoglobulin-like and transmembrane domains 2 [Source:ZFIN;Acc:ZDB-GENE-050522- 160]	0.0294314	1.42215	0.921538	3.5905	2.13252
rab40c	ENSDARG00000061208	RAB40c, member RAS oncogene family [Source:ZFIN;Acc:ZDB-GENE-030515-1]	0.0294314	0.579938	0.532121	6.32459	5.66261
tmem199	ENSDARG00000069314	transmembrane protein 199 [Source:ZFIN;Acc:ZDB-GENE-050522-150]	0.0295861	1.11513	0.836323	4.29411	3.18036
tspan18a	ENSDARG00000056656	tetraspanin 18a [Source:ZFIN;Acc:ZDB-GENE- 040718-232]	0.0295861	0.922607	0.751373	4.90206	3.89448
C18H15orf48	ENSDARG00000092903	chromosome 15 open reading frame 48 [Source:HGNC Symbol;Acc:HGNC:29898]	0.0295861	5.65124	0.629135	1.60466	0.353456
rpl18a	ENSDARG00000025073	ribosomal protein L18a [Source:ZFIN;Acc:ZDB- GENE-040426-1071]	0.0296937	0.457158	0.432928	8.2642	7.7319
ano8a	ENSDARG00000076265	anoctamin 8a [Source:ZFIN;Acc:ZDB-GENE- 070912-583]	0.0297083	1.07126	0.819064	4.31386	3.21427
zgc:154093	ENSDARG00000055897	zgc:154093 [Source:ZFIN;Acc:ZDB-GENE-061103- 517]	0.0297083	0.962202	0.770867	4.55047	3.51952
cnga1	ENSDARG00000012125	cyclic nucleotide gated channel alpha 1 [Source:ZFIN;Acc:ZDB-GENE-110408-39]	0.0297083	0.921489	0.750578	4.83048	3.83687
nme2b.2	ENSDARG00000099420	NME/NM23 nucleoside diphosphate kinase 2b, tandem duplicate 2 [Source:ZFIN;Acc:ZDB-GENE-000210-33]	0.0297083	0.499711	0.468376	8.60225	8.04843
si:ch73-138e16.7	ENSDARG00000098681	si:ch73-138e16.7 [Source:ZFIN;Acc:ZDB-GENE- 070705-206]	0.0297286	0.787242	0.675053	5.59623	4.76282
C2H1orf123	ENSDARG00000063341	chromosome 1 open reading frame 123 [Source:HGNC Symbol;Acc:HGNC:26059]	0.0298457	1.12355	0.838811	4.31886	3.11584
LPIN1 (2 of 2)	ENSDARG00000103380	lipin 1 [Source:HGNC Symbol;Acc:HGNC:13345]	0.0298518	0.932888	0.756141	5.28914	4.36244
zgc:162879	ENSDARG00000074163	zgc:162879 [Source:ZFIN;Acc:ZDB-GENE-070424- 92]	0.0298598	1.14772	0.847527	4.27033	3.25509
rab24	ENSDARG00000054032	RAB24, member RAS oncogene family [Source:ZFIN;Acc:ZDB-GENE-050706-110]	0.0298813	1.18544	0.860185	4.12874	2.87807
adipor1a	ENSDARG00000002912	adiponectin receptor 1a [Source:ZFIN;Acc:ZDB- GENE-040718-169]	0.0298813	0.836736	0.70434	5.04035	4.12192
si:rp71-36d5.4	ENSDARG00000012581	si:rp71-36d5.4 [Source:ZFIN;Acc:ZDB-GENE- 120709-31]	0.0298924	1.6155	0.946375	3.50363	2.62005
ciarta	ENSDARG00000058094	circadian associated repressor of transcription a [Source:ZFIN;Acc:ZDB-GENE-030131-7016]	0.0299446	0.654228	0.586765	5.85521	5.11426
si:rp71-39b20.4	ENSDARG00000035861	si:rp71-39b20.4 [Source:ZFIN;Acc:ZDB-GENE- 070912-704]	0.0299596	1.35118	0.905062	3.88529	2.50937
RDH13 (2 of 3)	ENSDARG00000034577	retinol dehydrogenase 13 (all-trans/9-cis) [Source:HGNC Symbol;Acc:HGNC:19978]	0.0299756	3.12539	0.81325	1.59139	-1.17484
gpn3	ENSDARG00000069525	GPN-loop GTPase 3 [Source:ZFIN;Acc:ZDB-GENE- 040724-141]	0.0300176	1.26275	0.882956	3.86895	2.54614
tmem59	ENSDARG00000019033	transmembrane protein 59 [Source:ZFIN;Acc:ZDB-GENE-070912-397]	0.0300665	0.566795	0.521721	6.49529	5.85549
si:ch211-262h13.3	ENSDARG00000070898	si:ch211-262h13.3 [Source:ZFIN;Acc:ZDB-GENE- 050208-532]	0.0301441	1.37962	0.91073	3.63147	2.20261
zgc:113232	ENSDARG00000040118	zgc:113232 [Source:ZFIN;Acc:ZDB-GENE-050327- 86]	0.0301545	1.633	0.944311	4.25458	2.49829
nfyba	ENSDARG00000039185	nuclear transcription factor Y, beta a [Source:ZFIN;Acc:ZDB-GENE-050417-13]	0.0303139	0.840729	0.706165	5.54415	4.73401
AL953855.1	ENSDARG00000100998	No description	0.030426	0.881813	0.728866	4.84471	3.8824
tgif1	ENSDARG00000059337	TGFB-induced factor homeobox 1 [Source:ZFIN;Acc:ZDB-GENE-030131-475]	0.0304368	0.714154	0.627755	5.70694	4.95666
arpc3	ENSDARG00000057882	actin related protein 2/3 complex, subunit 3 [Source:ZFIN;Acc:ZDB-GENE-040625-107]	0.0304432	0.700888	0.618846	5.53154	4.75826
ddx6	ENSDARG00000061338	DEAD (Asp-Glu-Ala-Asp) box helicase 6 [Source:ZFIN;Acc:ZDB-GENE-070912-83]	0.0305249	0.640745	0.576781	6.3294	5.63195
CNNM1	ENSDARG00000078087	cyclin and CBS domain divalent metal cation transport mediator 1 [Source:HGNC Symbol;Acc:HGNC:102]	0.0307347	1.10882	0.83159	4.97864	3.82533
mphosph10	ENSDARG00000012495	M-phase phosphoprotein 10 (U3 small nucleolar ribonucleoprotein) [Source:ZFIN;Acc:ZDB-GENE- 030131-2146]	0.0307347	0.593378	0.541771	6.35211	5.68851
kpna2	ENSDARG00000038066	karyopherin alpha 2 (RAG cohort 1, importin alpha 1) [Source:ZFIN;Acc:ZDB-GENE-040718-22]	0.0307813	0.550647	0.508886	6.5751	5.96382
serac1	ENSDARG00000056121	serine active site containing 1 [Source:ZFIN;Acc:ZDB-GENE-040616-1]	0.0309062	0.951196	0.763781	4.72923	3.6649
ctdsp2	ENSDARG00000036102	CTD (carboxy-terminal domain, RNA polymerase II, polypeptide A) small phosphatase 2 [Source:ZFIN;Acc:ZDB-GENE-030131-184]	0.0313569	0.467535	0.44131	7.37187	6.81442
polr3glb	ENSDARG00000013734	polymerase (RNA) III (DNA directed) polypeptide G like b [Source:ZFIN;Acc:ZDB-GENE-041010-32]	0.0314597	0.798467	0.680396	5.16034	4.23058
phlda2	ENSDARG00000042874	pleckstrin homology-like domain, family A, member 2 [Source:ZFIN;Acc:ZDB-GENE-050522-73]	0.0315459	0.980266	0.776839	4.64087	3.57237
mrpl32	ENSDARG00000060489	mitochondrial ribosomal protein L32 [Source:ZFIN;Acc:ZDB-GENE-060825-188]	0.0316003	1.1822	0.855676	3.99729	2.75116
snapc5	ENSDARG00000062476	small nuclear RNA activating complex, polypeptide 5 [Source:ZFIN;Acc:ZDB-GENE-041111-50]	0.0316003	0.839111	0.704041	4.99461	4.10038
bcl6ab	ENSDARG00000069295	B-cell CLL/lymphoma 6a, genome duplicate b [Source:ZFIN;Acc:ZDB-GENE-030131-7523]	0.0316319	1.05801	0.810485	4.35343	3.28864
gal3st1a	ENSDARG00000062711	galactose-3-O-sulfotransferase 1a [Source:ZFIN;Acc:ZDB-GENE-060526-375]	0.0316339	1.46825	0.922739	3.49607	1.96564
si:ch211-256e16.6	ENSDARG00000079603	si:ch211-256e16.6 [Source:ZFIN;Acc:ZDB-GENE- 131121-456]	0.0316683	2.19983	0.93203	2.41922	0.257133
eif3ja	ENSDARG00000012603	eukaryotic translation initiation factor 3, subunit Ja [Source:ZFIN;Acc:ZDB-GENE-040426-1266]	0.0316683	0.568835	0.52271	6.65845	6.04265
glulc	ENSDARG00000013227	glutamate-ammonia ligase (glutamine synthase) c [Source:ZFIN;Acc:ZDB-GENE-060929-540]	0.0317379	2.40705	0.907463	2.38387	-0.3358
rps10	ENSDARG00000034897	ribosomal protein S10 [Source:ZFIN;Acc:ZDB- GENE-040426-1481]	0.0317379	0.569188	0.522966	7.12231	6.5039
ift172	ENSDARG00000041870	intraflagellar transport 172 [Source:ZFIN;Acc:ZDB-GENE-040827-1]	0.0317464	0.633915	0.571271	5.90697	5.18514
sepp1b	ENSDARG00000079727	selenoprotein P, plasma, 1b [Source:ZFIN;Acc:ZDB-GENE-030311-2]	0.0318795	1.01334	0.791168	4.4663	3.40348
lmbr1	ENSDARG00000024092	limb development membrane protein 1 [Source:ZFIN;Acc:ZDB-GENE-090128-4]	0.0319186	0.761932	0.657523	5.5738	4.72262
tbcb	ENSDARG00000068404	tubulin folding cofactor B [Source:ZFIN;Acc:ZDB-GENE-030131-9296]	0.0319186	0.536574	0.497423	6.71978	6.09739
anxa13l	ENSDARG00000013613	annexin A13, like [Source:ZFIN;Acc:ZDB-GENE- 050522-310]	0.031974	0.979265	0.775672	4.63153	3.51529
ift20	ENSDARG00000040556	intraflagellar transport 20 homolog (Chlamydomonas) [Source:ZFIN;Acc:ZDB-GENE-040614-2]	0.0319858	1.10069	0.826324	4.68357	3.43842
clul1	ENSDARG00000055595	clusterin-like 1 (retinal) [Source:ZFIN;Acc:ZDB-GENE-031118-57]	0.0320315	1.30962	0.890162	5.10274	4.03377
si:dkeyp-44a8.2	ENSDARG00000092493	si:dkeyp-44a8.2 [Source:ZFIN;Acc:ZDB-GENE- 070705-542]	0.0320315	0.644053	0.578374	6.10048	5.39343
gck	ENSDARG00000068006	glucokinase (hexokinase 4) [Source:ZFIN;Acc:ZDB-GENE-060825-204]	0.0323084	0.689744	0.610092	5.98116	5.24855
umodl1	ENSDARG00000068923	uromodulin-like 1 [Source:ZFIN;Acc:ZDB-GENE- 091204-140]	0.0324359	2.0072	0.941504	2.70941	0.938418
wdr54	ENSDARG00000010248	WD repeat domain 54 [Source:ZFIN;Acc:ZDB- GENE-040801-151]	0.032631	1.4728	0.919394	3.77326	2.49188
ift140	ENSDARG00000031886	intraflagellar transport 140 homolog (Chlamydomonas) [Source:ZFIN;Acc:ZDB-GENE-040724-165]	0.0327597	0.826818	0.695763	5.48067	4.78404
slc8a4b	ENSDARG00000037145	solute carrier family 8 (sodium/calcium exchanger), member 4b [Source:ZFIN;Acc:ZDB-GENE-050809- 103]	0.032784	0.851445	0.709665	4.90152	3.98052
ube2kb	ENSDARG00000013505	ubiquitin-conjugating enzyme E2Kb (UBC1 homolog, yeast) [Source:ZFIN;Acc:ZDB-GENE-980605-9]	0.0331143	0.793066	0.675684	5.4048	4.58538
zgc:153258	ENSDARG00000076839	zgc:153258 [Source:ZFIN;Acc:ZDB-GENE-060929- 108]	0.0333462	1.5383	0.926614	3.34774	1.83413
mcl1a	ENSDARG00000009779	myeloid cell leukemia 1a [Source:ZFIN;Acc:ZDB-GENE-000511-7]	0.0333462	0.903913	0.737196	5.18744	4.18732
rmnd1	ENSDARG00000027465	required for meiotic nuclear division 1 homolog (S. cerevisiae) [Source:ZFIN;Acc:ZDB-GENE-050522- 21]	0.0333934	1.11973	0.830894	4.2618	3.07109
si:dkey-266f7.10	ENSDARG00000086613	si:dkey-266f7.10 [Source:ZFIN;Acc:ZDB-GENE- 120215-242]	0.0334711	4.06008	0.693553	1.15341	-2.99676
rpl24	ENSDARG00000099104	ribosomal protein L24 [Source:ZFIN;Acc:ZDB- GENE-020419-25]	0.0334711	0.465795	0.439388	8.29152	7.73731
crygm2d2	ENSDARG00000086917	crystallin, gamma M2d2 [Source:ZFIN;Acc:ZDB- GENE-060918-1]	0.0336101	0.689403	0.609115	6.08105	5.34339
gpsm2	ENSDARG00000017311	G-protein signaling modulator 2 [Source:ZFIN;Acc:ZDB-GENE-040426-1169]	0.0336497	0.643564	0.577234	5.85637	5.1213
UBL4A	ENSDARG00000007359	ubiquitin-like 4A [Source:HGNC Symbol;Acc:HGNC:12505]	0.0337098	1.40464	0.905906	3.5542	2.08695
si:ch211-56a11.2	ENSDARG00000093677	si:ch211-56a11.2 [Source:ZFIN;Acc:ZDB-GENE- 091204-123]	0.0337098	2.4269	0.89725	2.2599	-0.204283
aldh9a1a.1	ENSDARG00000069100	aldehyde dehydrogenase 9 family, member A1a, tandem duplicate 1 [Source:ZFIN;Acc:ZDB-GENE-030131-1257]	0.0337747	0.415681	0.396646	8.56648	8.08274
csnk2a2b	ENSDARG00000013582	casein kinase 2, alpha prime polypeptide b [Source:ZFIN;Acc:ZDB-GENE-090406-4]	0.0337974	0.630074	0.567471	6.17946	5.47343
cnpy1	ENSDARG00000003757	canopy1 [Source:ZFIN;Acc:ZDB-GENE-060315-3]	0.0338162	0.865082	0.716054	4.94634	4.04237
pnp6	ENSDARG00000040942	purine nucleoside phosphorylase 6 [Source:ZFIN;Acc:ZDB-GENE-040426-1800]	0.0338721	1.43881	0.911308	3.40417	1.92794
CT583723.1	ENSDARG00000102759	No description	0.0341678	1.46536	0.914465	3.73958	2.41173
abcf1	ENSDARG00000031795	ATP-binding cassette, sub-family F (GCN20), member 1 [Source:ZFIN;Acc:ZDB-GENE-050517-31]	0.034208	0.48976	0.459061	8.25021	7.65518
tfe3a	ENSDARG00000098903	transcription factor binding to IGHM enhancer 3a [Source:ZFIN;Acc:ZDB-GENE-010919-2]	0.0342512	0.687671	0.607525	5.64243	4.88435
riok1	ENSDARG00000016399	RIO kinase 1 (yeast) [Source:ZFIN;Acc:ZDB- GENE-040426-1927]	0.0343164	0.68918	0.608518	5.57275	4.8251
si:ch211-145n14.3	ENSDARG00000097196	si:ch211-145n14.3 [Source:ZFIN;Acc:ZDB-GENE- 131127-407]	0.0343587	1.07195	0.81136	4.54528	3.3824
pard6a	ENSDARG00000069378	par-6 family cell polarity regulator alpha [Source:ZFIN;Acc:ZDB-GENE-070705-215]	0.0343743	0.7411	0.642515	6.02915	5.25402
sirt1	ENSDARG00000068064	sirtuin 1 [Source:ZFIN;Acc:ZDB-GENE-070801- 2]	0.0343846	0.697678	0.614173	5.70512	4.94029
cplx2l	ENSDARG00000018997	complexin 2, like [Source:ZFIN;Acc:ZDB-GENE- 040718-160]	0.0343846	0.601164	0.546046	6.75847	6.09174
CU896691.1	ENSDARG00000087901	Uncharacterized protein [Source:UniProtKB/TrEMBL;Acc:F1QTZ5]	0.0344909	2.04503	0.930539	2.7029	0.718462
rdh12l	ENSDARG00000045277	retinol dehydrogenase 12, like [Source:ZFIN;Acc:ZDB-GENE-040801-48]	0.03452	1.44873	0.910795	3.41791	1.88526
si:dkey-199f5.8	ENSDARG00000018853	si:dkey-199f5.8 [Source:ZFIN;Acc:ZDB-GENE- 030131-4733]	0.034843	0.798281	0.677249	5.45203	4.60741
st3gal1l3	ENSDARG00000099289	ST3 beta-galactoside alpha-2,3- sialyltransferase 1, like 3 [Source:ZFIN;Acc:ZDB-GENE- 100922-174]	0.0348667	4.48203	0.666421	1.08915	-1.99676
myl12.2	ENSDARG00000025326	myosin, light chain 12, genome duplicate 2 [Source:ZFIN;Acc:ZDB-GENE-030131-9028]	0.0348695	0.959311	0.762471	4.72923	3.69596
slc30a5	ENSDARG00000051921	solute carrier family 30 (zinc transporter), member 5 [Source:ZFIN;Acc:ZDB-GENE-040718-6]	0.0348695	0.737784	0.640087	5.50534	4.64903
slc35d1b	ENSDARG00000027986	solute carrier family 35 (UDP-GlcA/UDP- GalNAc transporter), member D1b [Source:ZFIN;Acc:ZDB-GENE- 040426-1213]	0.034977	0.98844	0.77551	4.63892	3.60073
trpm1b	ENSDARG00000103476	transient receptor potential cation channel, subfamily M, member 1b [Source:ZFIN;Acc:ZDB-GENE-070424- 31]	0.0349849	1.96089	0.923231	6.80401	4.69604
rpl37	ENSDARG00000034291	ribosomal protein L37 [Source:ZFIN;Acc:ZDB- GENE-040625-39]	0.034986	0.600654	0.545424	6.4256	5.73409
zgc:56493	ENSDARG00000031435	zgc:56493 [Source:ZFIN;Acc:ZDB-GENE-030131- 8581]	0.0350257	0.595209	0.541365	6.3188	5.64112
C20H12orf57	ENSDARG00000030038	chromosome 12 open reading frame 57 [Source:HGNC Symbol;Acc:HGNC:29521]	0.0352594	1.17615	0.846215	3.91191	2.66279
oscp1a	ENSDARG00000104403	organic solute carrier partner 1a [Source:ZFIN;Acc:ZDB-GENE-080204-2]	0.0353253	1.35634	0.892217	3.78081	2.28721
GRB7	ENSDARG00000042726	growth factor receptor-bound protein 7 [Source:HGNC Symbol;Acc:HGNC:4567]	0.0354144	1.07836	0.812046	4.30725	3.1829
EIF3J (3 of 3)	ENSDARG00000097988	eukaryotic translation initiation factor 3, subunit J [Source:HGNC Symbol;Acc:HGNC:3270]	0.0354144	0.557271	0.512461	6.75931	6.19848
zgc:153981	ENSDARG00000069529	zgc:153981 [Source:ZFIN;Acc:ZDB-GENE-061103- 367]	0.0354545	1.49437	0.914911	3.36863	1.76404
si:ch211-161h7.8	ENSDARG00000089919	si:ch211-161h7.8 [Source:ZFIN;Acc:ZDB-GENE- 091204-302]	0.0356816	1.56648	0.922114	3.41233	1.75812
pmp22a	ENSDARG00000105223	peripheral myelin protein 22a [Source:ZFIN;Acc:ZDB-GENE-030131-6757]	0.0356944	0.728984	0.63391	5.39526	4.60495
stxbp4	ENSDARG00000076997	syntaxin binding protein 4 [Source:ZFIN;Acc:ZDB-GENE-110420-5]	0.035762	1.05158	0.80112	4.29807	3.21045
dlx4b	ENSDARG00000071560	distal-less homeobox 4b [Source:ZFIN;Acc:ZDB- GENE-990415-50]	0.0360124	2.05836	0.92338	2.5381	0.668694
ndufb11	ENSDARG00000043467	NADH dehydrogenase (ubiquinone) 1 beta subcomplex, 11 [Source:ZFIN;Acc:ZDB-GENE-050309-25]	0.0360124	0.917495	0.740965	4.7926	3.79171
dap1b	ENSDARG00000036895	death associated protein 1b [Source:ZFIN;Acc:ZDB-GENE-000511-4]	0.0362459	1.14147	0.833245	4.08686	2.88256
fam162a	ENSDARG00000063344	family with sequence similarity 162, member A [Source:ZFIN;Acc:ZDB-GENE-030131-8307]	0.0363808	1.04997	0.799644	4.5152	3.40303
mns1	ENSDARG00000060169	meiosis-specific nuclear structural 1 [Source:ZFIN;Acc:ZDB-GENE-030521-42]	0.036528	1.13166	0.829206	4.34365	3.18776
snx10a	ENSDARG00000004405	sorting nexin 10a [Source:ZFIN;Acc:ZDB-GENE- 050809-44]	0.0366831	1.83775	0.930012	2.76782	0.856916
syt14b	ENSDARG00000001891	synaptotagmin XIVb [Source:ZFIN;Acc:ZDB-GENE- 041014-36]	0.0367071	0.967754	0.764064	4.58522	3.62505
polr3k	ENSDARG00000037835	polymerase (RNA) III (DNA directed) polypeptide K [Source:ZFIN;Acc:ZDB-GENE-040718-291]	0.0368072	1.59892	0.921174	3.90625	2.31472
cyp26a1	ENSDARG00000033999	cytochrome P450, family 26, subfamily A, polypeptide 1 [Source:ZFIN;Acc:ZDB-GENE-990415-44]	0.0368072	1.14293	0.83266	3.9795	2.75911
cox7b	ENSDARG00000098250	cytochrome c oxidase subunit VIIb [Source:ZFIN;Acc:ZDB-GENE-030131-6602]	0.0368072	0.87336	0.717523	5.25207	4.22432
si:dkey-65b13.13	ENSDARG00000101924	si:dkey-65b13.13 [Source:ZFIN;Acc:ZDB-GENE- 141216-308]	0.0368465	1.6915	0.926319	3.2013	1.42911
CA10 (1 of 2)	ENSDARG00000009568	carbonic anhydrase X [Source:HGNC Symbol;Acc:HGNC:1369]	0.0368465	1.56156	0.917575	3.65953	2.0797
ackr3b	ENSDARG00000058179	atypical chemokine receptor 3b [Source:ZFIN;Acc:ZDB-GENE-031116-61]	0.0369186	1.14765	0.833897	4.17969	2.94188
ntng2b	ENSDARG00000087100	netrin g2b [Source:ZFIN;Acc:ZDB-GENE-110502- 1]	0.0369307	0.929355	0.745732	4.76869	3.77744
carf	ENSDARG00000019950	calcium responsive transcription factor [Source:ZFIN;Acc:ZDB-GENE-070912-172]	0.03697	0.821782	0.689096	5.09543	4.15171
psmb3	ENSDARG00000013938	proteasome (prosome, macropain) subunit, beta type, 3 [Source:ZFIN;Acc:ZDB-GENE-040426-2682]	0.0373999	0.794567	0.673075	5.15264	4.32234
dnah7l	ENSDARG00000000606	dynein, axonemal, heavy polypeptide 7 like [Source:ZFIN;Acc:ZDB-GENE-030616-623]	0.0376049	0.892718	0.726779	4.86988	3.92889
klf18	ENSDARG00000018757	Kruppel-like factor 18 [Source:ZFIN;Acc:ZDB- GENE-060312-34]	0.0376615	0.751479	0.646831	5.34947	4.55549
npc2	ENSDARG00000090912	Niemann-Pick disease, type C2 [Source:ZFIN;Acc:ZDB-GENE-021206-13]	0.0376664	0.793625	0.672298	5.42553	4.55961
irf7	ENSDARG00000045661	interferon regulatory factor 7 [Source:ZFIN;Acc:ZDB-GENE-040426-1518]	0.0378907	2.44224	0.871398	2.76372	1.65284
C10H11orf63	ENSDARG00000068982	chromosome 11 open reading frame 63 [Source:HGNC Symbol;Acc:HGNC:26288]	0.0380161	1.89906	0.923131	2.85177	0.784357
emc2	ENSDARG00000003308	ER membrane protein complex subunit 2 [Source:ZFIN;Acc:ZDB-GENE-040625-82]	0.0380215	0.51717	0.480285	6.76064	6.16261
KIF9	ENSDARG00000031693	kinesin family member 9 [Source:HGNC Symbol;Acc:HGNC:16666]	0.0380711	1.51251	0.909722	3.72631	2.68434
nptx2b	ENSDARG00000045164	neuronal pentraxin IIb [Source:ZFIN;Acc:ZDB- GENE-110328-1]	0.038126	1.53332	0.912224	3.28829	1.60796
marcksl1b	ENSDARG00000035715	MARCKS-like 1b [Source:ZFIN;Acc:ZDB-GENE- 040426-2315]	0.0381952	0.415795	0.396104	8.45974	7.97664
ppa1a	ENSDARG00000099933	pyrophosphatase (inorganic) 1a [Source:ZFIN;Acc:ZDB-GENE-040426-1695]	0.0382997	1.92294	0.922629	2.62679	0.670931
si:ch211-22i13.2	ENSDARG00000043485	si:ch211-22i13.2 [Source:ZFIN;Acc:ZDB-GENE- 041014-143]	0.0383564	0.890753	0.72501	4.81839	3.87043
C12H16orf93	ENSDARG00000096777	chromosome 16 open reading frame 93 [Source:HGNC Symbol;Acc:HGNC:28078]	0.0384945	2.33528	0.884699	3.69533	2.78101
atp6v0e1	ENSDARG00000101794	ATPase, H+ transporting, lysosomal V0 subunit e1 [Source:ZFIN;Acc:ZDB-GENE-041010-133]	0.0387484	0.792122	0.670595	5.41991	4.67055
nlk1	ENSDARG00000006566	nemo-like kinase, type 1 [Source:ZFIN;Acc:ZDB-GENE-040701-1]	0.038833	0.623981	0.560889	6.00078	5.31277
si:ch211-286b4.4	ENSDARG00000096859	si:ch211-286b4.4 [Source:ZFIN;Acc:ZDB-GENE- 131127-605]	0.0388739	1.96839	0.914627	2.90466	1.0882
lye	ENSDARG00000100630	lymphocyte antigen-6, epidermis [Source:ZFIN;Acc:ZDB-GENE-120104-1]	0.0389077	1.16888	0.837441	4.09062	2.79289
SNORD31	ENSDARG00000082440	Small nucleolar RNA SNORD31 [Source:RFAM;Acc:RF00089]	0.0390908	1.65456	0.918155	3.15341	1.44532
bnip3lb	ENSDARG00000028067	BCL2/adenovirus E1B interacting protein 3- like b [Source:ZFIN;Acc:ZDB-GENE-040325-1]	0.0390908	0.935464	0.74635	4.55395	3.53088
gfral	ENSDARG00000089709	GDNF family receptor alpha like [Source:ZFIN;Acc:ZDB-GENE-110607-2]	0.0392403	1.87399	0.920802	2.73655	0.991876
ginm1	ENSDARG00000021975	glycoprotein integral membrane 1 [Source:ZFIN;Acc:ZDB-GENE-030131-5900]	0.0392852	0.67752	0.597977	5.53418	4.80382
cdk2ap2	ENSDARG00000103145	cyclin-dependent kinase 2 associated protein 2 [Source:ZFIN;Acc:ZDB-GENE-040718-35]	0.0393756	1.09388	0.811717	4.38573	3.18865
arf1l	ENSDARG00000016393	ADP-ribosylation factor 1 like [Source:ZFIN;Acc:ZDB-GENE-030131-5234]	0.0394706	0.612854	0.55264	6.72361	6.06698
zgc:194330	ENSDARG00000061432	zgc:194330 [Source:ZFIN;Acc:ZDB-GENE-080722- 3]	0.0395739	3.98308	0.676912	1.1493	-2.99676
sema6d	ENSDARG00000002748	sema domain, transmembrane domain (TM), and cytoplasmic domain, (semaphorin) 6D [Source:ZFIN;Acc:ZDB- GENE-040426-1933]	0.0395739	0.706425	0.617019	5.41002	4.63193
csnk2b	ENSDARG00000077776	casein kinase 2, beta polypeptide [Source:ZFIN;Acc:ZDB-GENE-990415-29]	0.0395739	0.586983	0.533605	6.16837	5.52204
mak	ENSDARG00000059287	male germ cell-associated kinase [Source:ZFIN;Acc:ZDB-GENE-030131-7279]	0.039714	0.612943	0.552589	6.51774	5.85404
lrch4	ENSDARG00000068258	leucine-rich repeats and calponin homology (CH) domain containing 4 [Source:ZFIN;Acc:ZDB-GENE-060503- 749]	0.0399269	0.664743	0.588991	6.17423	5.83974
zgc:123105	ENSDARG00000003127	zgc:123105 [Source:ZFIN;Acc:ZDB-GENE-051113- 272]	0.0399627	0.656396	0.583247	5.72192	4.98924
slc39a6	ENSDARG00000068143	solute carrier family 39 (zinc transporter), member 6 [Source:ZFIN;Acc:ZDB-GENE-030131-3023]	0.039981	0.848281	0.701264	5.13332	4.23334
v2ra18	ENSDARG00000101909	vomeronasal 2 receptor, a18 [Source:ZFIN;Acc:ZDB-GENE-050419-40]	0.039981	4.06884	0.650233	1.24562	-2.78028
rab5c	ENSDARG00000026712	RAB5C, member RAS oncogene family [Source:ZFIN;Acc:ZDB-GENE-031118-30]	0.0402047	0.560186	0.513224	6.51923	5.8809
cdkn1bb	ENSDARG00000054271	cyclin-dependent kinase inhibitor 1Bb [Source:ZFIN;Acc:ZDB-GENE-030521-13]	0.0403839	0.760511	0.650593	5.60566	4.80113
psmc2	ENSDARG00000020101	proteasome (prosome, macropain) 26S subunit, ATPase 2 [Source:ZFIN;Acc:ZDB-GENE-040426-1327]	0.0405569	0.574435	0.523906	6.18213	5.53921
si:ch211-237l4.6	ENSDARG00000056915	si:ch211-237l4.6 [Source:ZFIN;Acc:ZDB-GENE- 040724-42]	0.0405875	2.49214	0.855162	2.16054	-0.300605
rps6ka2	ENSDARG00000028469	ribosomal protein S6 kinase, polypeptide 2 [Source:ZFIN;Acc:ZDB-GENE-090827-1]	0.0405875	1.09615	0.810818	4.3772	3.22393
psmc5	ENSDARG00000015315	proteasome (prosome, macropain) 26S subunit, ATPase, 5 [Source:ZFIN;Acc:ZDB-GENE-030131-6547]	0.0406679	0.51377	0.476938	6.57741	5.9878
socs6b	ENSDARG00000015863	suppressor of cytokine signaling 6b [Source:ZFIN;Acc:ZDB-GENE-030131-1670]	0.0410153	1.02976	0.785283	4.245	3.13016
lhx4	ENSDARG00000039458	LIM homeobox 4 [Source:ZFIN;Acc:ZDB-GENE- 060728-1]	0.0410959	1.0426	0.790216	4.39221	3.25166
cbsb	ENSDARG00000010946	cystathionine-beta-synthase b [Source:ZFIN;Acc:ZDB-GENE-021030-3]	0.0411054	0.549493	0.504763	6.27791	5.66466
rnf7	ENSDARG00000055524	ring finger protein 7 [Source:ZFIN;Acc:ZDB- GENE-050220-12]	0.0411395	1.13457	0.822977	3.96277	2.76954
DNAL1 (2 of 2)	ENSDARG00000097505	dynein, axonemal, light chain 1 [Source:HGNC Symbol;Acc:HGNC:23247]	0.0412501	1.43471	0.890817	4.0575	2.78221
nek8	ENSDARG00000045626	NIMA-related kinase 8 [Source:ZFIN;Acc:ZDB- GENE-020509-1]	0.0412819	1.45425	0.89449	3.39903	2.06335
irx6a	ENSDARG00000034420	iroquois homeobox 6a [Source:ZFIN;Acc:ZDB- GENE-040712-5]	0.0414051	1.66869	0.912656	2.99304	1.3069
eif1axa	ENSDARG00000029003	eukaryotic translation initiation factor 1A, X-linked, a [Source:ZFIN;Acc:ZDB-GENE-041010-185]	0.0414434	0.793583	0.669509	4.97694	4.10867
stmn4	ENSDARG00000030106	stathmin-like 4 [Source:ZFIN;Acc:ZDB-GENE- 040426-2732]	0.0414515	0.613575	0.552381	7.15089	7.25433
CABZ01046577.1	ENSDARG00000098732	No description	0.0415001	4.04413	0.60917	0.352681	-2.70428
saxo2	ENSDARG00000006474	stabilizer of axonemal microtubules 2 [Source:ZFIN;Acc:ZDB-GENE-051127-27]	0.0415202	1.93428	0.91064	2.69585	0.938418
fam76b	ENSDARG00000012432	family with sequence similarity 76, member B [Source:ZFIN;Acc:ZDB-GENE-030131-6955]	0.0416133	0.537859	0.495604	6.7465	6.13733
gipc2	ENSDARG00000009488	GIPC PDZ domain containing family, member 2 [Source:ZFIN;Acc:ZDB-GENE-040426-921]	0.0416424	0.70049	0.611957	5.44594	4.6826
si:ch211-264f5.2	ENSDARG00000078547	si:ch211-264f5.2 [Source:ZFIN;Acc:ZDB-GENE- 080303-2]	0.0416627	3.1968	0.751277	5.40345	4.94378
si:dkeyp-72e1.9	ENSDARG00000103743	si:dkeyp-72e1.9 [Source:ZFIN;Acc:ZDB-GENE- 120215-89]	0.0417413	0.705517	0.615198	5.43963	4.64311
pfdn1	ENSDARG00000014536	prefoldin subunit 1 [Source:ZFIN;Acc:ZDB- GENE-050306-50]	0.0417555	0.792719	0.668697	5.05939	4.19014
nap1l4b	ENSDARG00000068868	nucleosome assembly protein 1-like 4b [Source:ZFIN;Acc:ZDB-GENE-041114-168]	0.041776	0.472927	0.443651	6.97842	6.43394
mpeg1.2	ENSDARG00000043093	macrophage expressed 1, tandem duplicate 2 [Source:ZFIN;Acc:ZDB-GENE-050522-305]	0.0418052	1.0217	0.780868	4.69118	3.64072
zgc:113314	ENSDARG00000069453	zgc:113314 [Source:ZFIN;Acc:ZDB-GENE-050913- 19]	0.0418769	1.81989	0.910226	3.01737	1.22884
gsnb	ENSDARG00000045262	gelsolin b [Source:ZFIN;Acc:ZDB-GENE-030131- 8567]	0.0420454	0.634169	0.566783	5.86597	5.1246
si:ch211-195b11.3	ENSDARG00000100582	si:ch211-195b11.3 [Source:ZFIN;Acc:ZDB-GENE- 141222-6]	0.0421501	0.908341	0.730081	4.8624	3.8794
eif3jb	ENSDARG00000053370	eukaryotic translation initiation factor 3, subunit Jb [Source:ZFIN;Acc:ZDB-GENE-040426-2900]	0.0422217	0.645752	0.574808	5.76435	5.10569
cldn17	ENSDARG00000099950	claudin 17 [Source:ZFIN;Acc:ZDB-GENE-070821- 2]	0.0422355	0.856197	0.703474	4.78038	3.85022
slc26a2	ENSDARG00000011618	solute carrier family 26 (anion exchanger), member 2 [Source:ZFIN;Acc:ZDB-GENE-030717-3]	0.0423753	0.814309	0.680506	5.03637	4.17455
oclnb	ENSDARG00000003091	occludin b [Source:ZFIN;Acc:ZDB-GENE-041212- 43]	0.0424563	0.658265	0.583306	5.61471	4.87137
bccip	ENSDARG00000004948	BRCA2 and CDKN1A interacting protein [Source:ZFIN;Acc:ZDB-GENE-050320-39]	0.0424805	0.641639	0.57181	5.74321	5.00059
impg2b	ENSDARG00000100105	interphotoreceptor matrix proteoglycan 2b [Source:ZFIN;Acc:ZDB-GENE-081031-56]	0.0425771	0.589841	0.534616	6.33739	5.67165
cacna2d4a	ENSDARG00000103810	calcium channel, voltage-dependent, alpha 2/delta subunit 4a [Source:ZFIN;Acc:ZDB-GENE-041210-213]	0.0425801	1.96659	0.901509	2.92557	1.40691
slmapb	ENSDARG00000020764	sarcolemma associated protein b [Source:ZFIN;Acc:ZDB-GENE-040426-809]	0.0427462	0.830211	0.689015	4.90846	3.9886
zgc:174637	ENSDARG00000097789	zgc:174637 [Source:ZFIN;Acc:ZDB-GENE-071004- 70]	0.0427524	2.00865	0.897706	2.73898	0.975958
sigmar1	ENSDARG00000011418	sigma non-opioid intracellular receptor 1 [Source:ZFIN;Acc:ZDB-GENE-040426-1006]	0.0427524	1.00025	0.7708	4.39509	3.42657
ywhae1	ENSDARG00000006399	tyrosine 3-monooxygenase/tryptophan 5- monooxygenase activation protein, epsilon polypeptide 1 [Source:ZFIN;Acc:ZDB-GENE-030131-779]	0.0427524	0.393839	0.376481	8.07445	7.60749
psmd4b	ENSDARG00000023279	proteasome (prosome, macropain) 26S subunit, non-ATPase, 4b [Source:ZFIN;Acc:ZDB-GENE-050417-96]	0.0428013	0.6526	0.579217	5.82223	5.08621
syvn1	ENSDARG00000017842	synovial apoptosis inhibitor 1, synoviolin [Source:ZFIN;Acc:ZDB-GENE-030131-7166]	0.0428013	0.58516	0.531079	5.99708	5.33237
stard3	ENSDARG00000017809	StAR-related lipid transfer (START) domain containing 3 [Source:ZFIN;Acc:ZDB-GENE-001120-2]	0.0428774	0.86425	0.707011	4.73837	3.80156
FP017217.1	ENSDARG00000083837	No description	0.0428974	4.51458	0.606429	0.695851	-1.99676
taf7	ENSDARG00000019572	TAF7 RNA polymerase II, TATA box binding protein (TBP)-associated factor [Source:ZFIN;Acc:ZDB-GENE- 020419-18]	0.0429806	0.637707	0.568824	6.00699	5.31456
med19a	ENSDARG00000037392	mediator complex subunit 19a [Source:ZFIN;Acc:ZDB-GENE-060929-232]	0.043	0.648752	0.576475	5.79485	5.05325
mapkapk2b	ENSDARG00000018530	mitogen-activated protein kinase-activated protein kinase 2b [Source:ZFIN;Acc:ZDB-GENE-071018-1]	0.0431017	1.58938	0.901065	3.62657	2.07493
nifk	ENSDARG00000040666	nucleolar protein interacting with the FHA domain of MKI67 [Source:ZFIN;Acc:ZDB-GENE-021231-4]	0.0431017	0.695902	0.6081	5.40033	4.62927
banf1	ENSDARG00000037009	barrier to autointegration factor 1 [Source:ZFIN;Acc:ZDB-GENE-030131-6657]	0.0433177	0.595288	0.538332	5.92329	5.2531
si:ch211-152p11.8	ENSDARG00000095427	si:ch211-152p11.8 [Source:ZFIN;Acc:ZDB-GENE- 060503-858]	0.0433874	1.20588	0.839764	3.96399	2.63281
SNORA69	ENSDARG00000082020	Small nucleolar RNA SNORA69 [Source:RFAM;Acc:RF00265]	0.0434185	0.544367	0.500093	6.57612	5.96363
cfap20	ENSDARG00000100514	cilia and flagella associated protein 20 [Source:ZFIN;Acc:ZDB-GENE-040426-1784]	0.043549	1.32438	0.86726	3.80291	2.79783
macc1	ENSDARG00000040717	metastasis associated in colon cancer 1 [Source:ZFIN;Acc:ZDB-GENE-091006-3]	0.043549	0.976331	0.759565	4.57763	3.53384
as3mt	ENSDARG00000027572	arsenite methyltransferase [Source:ZFIN;Acc:ZDB-GENE-060312-15]	0.0435591	1.25954	0.853068	3.79691	2.42911
utp11l	ENSDARG00000039958	UTP11-like, U3 small nucleolar ribonucleoprotein (yeast) [Source:ZFIN;Acc:ZDB-GENE-030131- 8093]	0.0436854	1.23223	0.846319	3.71335	2.40832
si:ch211-117l17.6	ENSDARG00000102059	si:ch211-117l17.6 [Source:ZFIN;Acc:ZDB-GENE- 110914-213]	0.043776	2.14445	0.886111	2.37261	0.0881985
gcnt7	ENSDARG00000040608	glucosaminyl (N-acetyl) transferase family member 7 [Source:ZFIN;Acc:ZDB-GENE-120919-3]	0.0438373	0.933768	0.740146	4.71789	3.75911
fzr1a	ENSDARG00000015254	fizzy/cell division cycle 20 related 1a (Drosophila) [Source:ZFIN;Acc:ZDB-GENE-040426-712]	0.0439533	0.701419	0.611218	5.38868	4.57467
sall3b	ENSDARG00000057586	spalt-like transcription factor 3b [Source:ZFIN;Acc:ZDB-GENE-030131-9140]	0.0439994	0.743976	0.637992	5.2174	4.38908
plekhf1	ENSDARG00000102435	pleckstrin homology domain containing, family F (with FYVE domain) member 1 [Source:ZFIN;Acc:ZDB- GENE-040426-1289]	0.0440119	1.12221	0.813927	4.55525	3.33663
crygm2d13	ENSDARG00000057460	crystallin, gamma M2d13 [Source:ZFIN;Acc:ZDB- GENE-040718-105]	0.0440119	0.66842	0.589391	5.75367	5.00464
zgc:153292	ENSDARG00000070458	zgc:153292 [Source:ZFIN;Acc:ZDB-GENE-060929- 1098]	0.0440144	1.4448	0.885894	3.30785	1.83768
sox3	ENSDARG00000053569	SRY (sex determining region Y)-box 3 [Source:ZFIN;Acc:ZDB-GENE-980526-333]	0.0440144	0.777587	0.658102	5.15074	4.30238
ssr3	ENSDARG00000014165	signal sequence receptor, gamma [Source:ZFIN;Acc:ZDB-GENE-030131-9134]	0.0440144	0.698232	0.609102	5.57062	4.80592
sall4	ENSDARG00000044485	spalt-like transcription factor 4 [Source:ZFIN;Acc:ZDB-GENE-060328-2]	0.0441061	0.847259	0.696913	4.78776	3.86485
txlnbb	ENSDARG00000076241	taxilin beta b [Source:ZFIN;Acc:ZDB-GENE- 070424-77]	0.0442642	0.598721	0.540474	6.03716	5.38737
dre-mir-124-5	ENSDARG00000080174	dre-mir-124-5 [Source:miRBase;Acc:MI0001970]	0.0444075	1.56748	0.897643	3.1141	1.43378
hnrnpa1a	ENSDARG00000011020	heterogeneous nuclear ribonucleoprotein A1a [Source:ZFIN;Acc:ZDB-GENE-040426-1546]	0.044446	0.401283	0.38273	7.93659	7.64694
guca1c	ENSDARG00000030758	guanylate cyclase activator 1C [Source:ZFIN;Acc:ZDB-GENE-030829-1]	0.0446327	0.997187	0.767	4.54277	3.47385
fam174b	ENSDARG00000068709	family with sequence similarity 174, member B [Source:ZFIN;Acc:ZDB-GENE-050419-78]	0.0446926	0.9889	0.763575	4.57396	3.51216
six6a	ENSDARG00000025187	SIX homeobox 6a [Source:ZFIN;Acc:ZDB-GENE- 040426-1282]	0.0447962	1.71258	0.901908	3.07928	1.40044
si:dkey-17o15.2	ENSDARG00000103956	si:dkey-17o15.2 [Source:ZFIN;Acc:ZDB-GENE- 030131-4187]	0.0448056	0.876074	0.711227	4.71014	3.77251
ndufab1b	ENSDARG00000014915	NADH dehydrogenase (ubiquinone) 1, alpha/beta subcomplex, 1b [Source:ZFIN;Acc:ZDB-GENE-030131- 4437]	0.0448056	0.721834	0.623758	5.26847	4.49702
zgc:162999	ENSDARG00000097560	No description	0.044891	1.76777	0.901472	3.02353	1.30967
si:dkey-234h16.7	ENSDARG00000095754	si:dkey-234h16.7 [Source:ZFIN;Acc:ZDB-GENE- 060601-3]	0.044891	1.91156	0.899346	2.60393	0.603072
scpp5	ENSDARG00000078622	secretory calcium-binding phosphoprotein 5 [Source:ZFIN;Acc:ZDB-GENE-090313-256]	0.044891	1.2555	0.849334	4.53036	3.35172
prkg1a	ENSDARG00000020656	protein kinase, cGMP-dependent, type Ia [Source:ZFIN;Acc:ZDB-GENE-040426-1308]	0.044894	0.74286	0.636676	5.94499	5.14426
inpp5ka	ENSDARG00000099563	inositol polyphosphate-5-phosphatase Ka [Source:ZFIN;Acc:ZDB-GENE-070410-101]	0.0450153	0.865503	0.70565	4.84297	3.89983
mrto4	ENSDARG00000007130	mRNA turnover 4 homolog (S. cerevisiae) [Source:ZFIN;Acc:ZDB-GENE-050417-142]	0.0451947	0.93202	0.737896	4.89235	3.91681
atp5l	ENSDARG00000011841	ATP synthase, H+ transporting, mitochondrial F0 complex, subunit g [Source:ZFIN;Acc:ZDB-GENE-030131- 5177]	0.0452237	0.602119	0.542576	6.25602	5.55809
nhsl1a	ENSDARG00000054537	NHS-like 1a [Source:ZFIN;Acc:ZDB-GENE-050411- 25]	0.045231	0.664425	0.586079	5.58976	4.86664
irbpl	ENSDARG00000096519	interphotoreceptor retinoid-binding protein like [Source:ZFIN;Acc:ZDB-GENE-070301-4]	0.0453628	2.12315	0.880593	2.39299	0.580645
SNORD52	ENSDARG00000081368	Small nucleolar RNA SNORD52 [Source:RFAM;Acc:RF00276]	0.0454663	2.05717	0.885949	2.51365	0.438418
fam195b	ENSDARG00000078383	family with sequence similarity 195, member B [Source:ZFIN;Acc:ZDB-GENE-060825-259]	0.0456112	1.19093	0.831608	4.03634	2.8319
rims2b	ENSDARG00000102690	regulating synaptic membrane exocytosis 2b [Source:ZFIN;Acc:ZDB-GENE-060503-893]	0.0457338	0.506462	0.469859	7.02546	6.43631
hepacam2	ENSDARG00000061365	HEPACAM family member 2 [Source:ZFIN;Acc:ZDB- GENE-060503-135]	0.0457681	1.46149	0.88333	3.52342	1.98829
si:ch73-236c18.9	ENSDARG00000099421	No description	0.0457762	6.16484	0.381824	0.119849	-3.57277
cldn7a	ENSDARG00000036376	claudin 7a [Source:ZFIN;Acc:ZDB-GENE-040718- 29]	0.046022	1.12442	0.811565	3.94577	2.73154
yeats4	ENSDARG00000045874	YEATS domain containing 4 [Source:ZFIN;Acc:ZDB-GENE-040718-252]	0.0462605	0.894468	0.71899	5.04936	4.34229
tmem97	ENSDARG00000040553	transmembrane protein 97 [Source:ZFIN;Acc:ZDB-GENE-110627-1]	0.0464377	1.42191	0.877201	4.17112	2.64781
letm2	ENSDARG00000077515	leucine zipper-EF-hand containing transmembrane protein 2 [Source:ZFIN;Acc:ZDB-GENE-090521- 4]	0.046507	0.56813	0.517174	6.07933	5.44043
mmadhc	ENSDARG00000005870	methylmalonic aciduria (cobalamin deficiency) cblD type, with homocystinuria [Source:ZFIN;Acc:ZDB-GENE-040704-50]	0.0465771	0.918308	0.730168	4.53973	3.53409
zmp:0000001101	ENSDARG00000056519	zmp:0000001101 [Source:ZFIN;Acc:ZDB-GENE- 140106-61]	0.0466623	0.713101	0.617165	5.90221	5.13639
ribc1	ENSDARG00000055739	RIB43A domain with coiled-coils 1 [Source:ZFIN;Acc:ZDB-GENE-081031-7]	0.046697	1.78684	0.896512	3.3053	2.16194
imp4	ENSDARG00000054540	IMP4, U3 small nucleolar ribonucleoprotein, homolog (yeast) [Source:ZFIN;Acc:ZDB-GENE-040718-474]	0.0471054	1.04398	0.782268	4.24064	3.16138
dmtf1	ENSDARG00000025824	cyclin D binding myb-like transcription factor 1 [Source:ZFIN;Acc:ZDB-GENE-040718-413]	0.0471556	0.647469	0.573746	5.67336	4.93572
msi1	ENSDARG00000010710	musashi RNA-binding protein 1 [Source:ZFIN;Acc:ZDB-GENE-050320-86]	0.0471556	0.506436	0.469525	6.73121	6.14448
fam60al	ENSDARG00000095007	family with sequence similarity 60, member A, like [Source:ZFIN;Acc:ZDB-GENE-031114-2]	0.0472373	0.711324	0.615765	5.65406	4.89123
si:ch211-11c15.3	ENSDARG00000092970	si:ch211-11c15.3 [Source:ZFIN;Acc:ZDB-GENE- 070126-5]	0.0474346	1.06423	0.789289	4.07928	2.96257
nt5c3a	ENSDARG00000058597	5'-nucleotidase, cytosolic IIIA [Source:ZFIN;Acc:ZDB-GENE-030131-439]	0.0476192	0.550558	0.503618	6.26871	5.62454
arrdc1a	ENSDARG00000068148	arrestin domain containing 1a [Source:ZFIN;Acc:ZDB-GENE-030925-15]	0.0477024	0.996059	0.762971	4.39118	3.37502
id2a	ENSDARG00000055283	inhibitor of DNA binding 2, dominant negative helix-loop-helix protein, a [Source:ZFIN;Acc:ZDB- GENE-020910-1]	0.0477522	0.608716	0.546409	5.85565	5.17086
fam110b	ENSDARG00000088073	family with sequence similarity 110, member B [Source:ZFIN;Acc:ZDB-GENE-050626-70]	0.0479763	0.758594	0.644326	5.08639	4.23647
dbpa	ENSDARG00000063014	D site albumin promoter binding protein a [Source:ZFIN;Acc:ZDB-GENE-060503-802]	0.0479952	0.599702	0.539875	6.31216	5.62588
cnga3b	ENSDARG00000012297	cyclic nucleotide gated channel alpha 3b [Source:ZFIN;Acc:ZDB-GENE-090312-121]	0.0480678	1.52108	0.884173	3.23105	1.62005
ftcd	ENSDARG00000007421	formimidoyltransferase cyclodeaminase [Source:ZFIN;Acc:ZDB-GENE-030131-9643]	0.0481888	0.557757	0.508909	6.11952	5.49745
kcnj12	ENSDARG00000104965	potassium inwardly-rectifying channel, subfamily J, member 12 [Source:ZFIN;Acc:ZDB-GENE-131126- 14]	0.0481995	2.643	0.809177	1.80113	-0.8358
sncb	ENSDARG00000104945	synuclein, beta [Source:ZFIN;Acc:ZDB-GENE- 040426-1615]	0.0481995	0.577667	0.523733	6.79327	6.14786
fgb	ENSDARG00000008969	fibrinogen beta chain [Source:ZFIN;Acc:ZDB- GENE-030131-9261]	0.0482656	0.456394	0.428813	7.80433	7.28098
TULP2	ENSDARG00000062902	tubby like protein 2 [Source:HGNC Symbol;Acc:HGNC:12424]	0.0484914	1.13695	0.811546	4.16339	3.0184
gnb1a	ENSDARG00000090454	guanine nucleotide binding protein (G protein), beta polypeptide 1a [Source:ZFIN;Acc:ZDB-GENE- 030131-823]	0.0489423	0.413185	0.392416	7.76059	7.27631
si:dkey-200l5.4	ENSDARG00000095294	si:dkey-200l5.4 [Source:ZFIN;Acc:ZDB-GENE- 091204-393]	0.0489969	1.17351	0.821605	3.83108	2.61765
lrrc73	ENSDARG00000063411	leucine rich repeat containing 73 [Source:ZFIN;Acc:ZDB-GENE-111118-2]	0.0490077	0.99475	0.760922	4.73846	3.73202
tsc22d3	ENSDARG00000075666	TSC22 domain family, member 3 [Source:ZFIN;Acc:ZDB-GENE-040426-1433]	0.0490077	0.628695	0.560035	6.12998	5.40981
dnajb14	ENSDARG00000069996	DnaJ (Hsp40) homolog, subfamily B, member 14 [Source:ZFIN;Acc:ZDB-GENE-061110-138]	0.0491083	0.866051	0.702469	4.67262	3.76118
OSBP2 (1 of 2)	ENSDARG00000022772	oxysterol binding protein 2 [Source:HGNC Symbol;Acc:HGNC:8504]	0.0491772	0.563229	0.512728	6.11602	5.52309
ptpn2b	ENSDARG00000035986	protein tyrosine phosphatase, non-receptor type 2, b [Source:ZFIN;Acc:ZDB-GENE-030909-8]	0.0492759	0.538368	0.493887	6.27959	5.71997
cyth3a	ENSDARG00000007807	cytohesin 3a [Source:ZFIN;Acc:ZDB-GENE- 120612-1]	0.0493419	0.667512	0.586293	5.57967	4.83144
pde7a	ENSDARG00000045305	phosphodiesterase 7A [Source:ZFIN;Acc:ZDB- GENE-031222-10]	0.0493726	0.596068	0.536769	6.27007	5.62467
ldhbb	ENSDARG00000071076	lactate dehydrogenase Bb [Source:ZFIN;Acc:ZDB-GENE-040718-176]	0.0494328	0.913319	0.72506	4.55134	3.60575
fgf10b	ENSDARG00000100475	fibroblast growth factor 10b [Source:ZFIN;Acc:ZDB-GENE-060828-1]	0.0494423	1.68743	0.888499	3.09667	1.36036
pmaip1	ENSDARG00000089307	phorbol-12-myristate-13-acetate-induced protein 1 [Source:ZFIN;Acc:ZDB-GENE-070119-3]	0.0494423	2.40573	0.834762	2.04409	-0.474567
hddc3	ENSDARG00000020473	HD domain containing 3 [Source:ZFIN;Acc:ZDB- GENE-050417-377]	0.0494772	1.53983	0.882626	3.16181	1.52132
RNF223 (2 of 2)	ENSDARG00000098411	ring finger protein 223 [Source:HGNC Symbol;Acc:HGNC:40020]	0.0497501	3.4376	0.687285	1.32737	-2.49676
tpi1b	ENSDARG00000040988	triosephosphate isomerase 1b [Source:ZFIN;Acc:ZDB-GENE-020416-4]	0.0498621	0.419818	0.397943	8.20291	7.72904
si:ch73-15n15.3	ENSDARG00000026095	si:ch73-15n15.3 [Source:ZFIN;Acc:ZDB-GENE- 141212-295]	0.0499931	1.95032	0.880421	2.81805	0.699395

## Sheet: Table S3 GO analysis
Analysis Type:	PANTHER Overrepresentation Test (Released 20221013)
Annotation Version and Release Date:	GO Ontology database DOI: 10.5281/zenodo.6799722 Released 2022-07-01
Analyzed List:	4TU-UPRT_enriched_p0.05.txt (Danio rerio)	There are duplicate IDs in the file. The unique set of IDs will be used.
Reference List:	Danio rerio (all genes in database)
Test Type:	FISHER
Correction:	FDR
GO biological process complete	Danio rerio - REFLIST (25704)	4TU-UPRT_enriched_p0.05.txt (1675)	4TU-UPRT_enriched_p0.05.txt (expected)	4TU-UPRT_enriched_p0.05.txt (over/under)	4TU-UPRT_enriched_p0.05.txt (fold Enrichment)	4TU-UPRT_enriched_p0.05.txt (raw P-value)	4TU-UPRT_enriched_p0.05.txt (FDR)
electron transport coupled proton transport (GO:0015990)	4	4	0.26	+	15.35	0.0008	0.037
energy coupled proton transmembrane transport, against electrochemical gradient (GO:0015988)	4	4	0.26	+	15.35	0.0008	0.0369
cone photoresponse recovery (GO:0036368)	6	5	0.39	+	12.79	0.000288	0.0169
mitochondrial electron transport, ubiquinol to cytochrome c (GO:0006122)	9	7	0.59	+	11.94	2.22e-05	0.00204
intracellular sequestering of iron ion (GO:0006880)	9	6	0.59	+	10.23	0.000161	0.0106
sequestering of metal ion (GO:0051238)	9	6	0.59	+	10.23	0.000161	0.0106
sequestering of iron ion (GO:0097577)	9	6	0.59	+	10.23	0.000161	0.0105
response to cold (GO:0009409)	16	8	1.04	+	7.67	5.86e-05	0.00459
mitochondrial electron transport, NADH to ubiquinone (GO:0006120)	21	10	1.37	+	7.31	9.67e-06	0.00102
aerobic electron transport chain (GO:0019646)	49	22	3.19	+	6.89	1.2e-10	4.9e-08
ATP synthesis coupled electron transport (GO:0042773)	54	24	3.52	+	6.82	2.05e-11	1.2e-08
mitochondrial ATP synthesis coupled electron transport (GO:0042775)	51	22	3.32	+	6.62	2.2e-10	8.26e-08
proton motive force-driven ATP synthesis (GO:0015986)	21	9	1.37	+	6.58	5.19e-05	0.00417
ATP biosynthetic process (GO:0006754)	26	11	1.69	+	6.49	8.45e-06	0.000913
cell redox homeostasis (GO:0045454)	19	8	1.24	+	6.46	0.00015	0.01
apoptotic mitochondrial changes (GO:0008637)	20	8	1.3	+	6.14	0.000199	0.0125
visual perception (GO:0007601)	175	70	11.4	+	6.14	2.13e-28	2e-24
oxidative phosphorylation (GO:0006119)	66	26	4.3	+	6.05	2.6e-11	1.36e-08
sensory perception of light stimulus (GO:0050953)	180	70	11.73	+	5.97	8.27e-28	3.88e-24
purine ribonucleoside triphosphate biosynthetic process (GO:0009206)	38	14	2.48	+	5.65	1.91e-06	0.000249
purine nucleoside triphosphate biosynthetic process (GO:0009145)	38	14	2.48	+	5.65	1.91e-06	0.000245
NADH dehydrogenase complex assembly (GO:0010257)	22	8	1.43	+	5.58	0.000336	0.0188
mitochondrial respiratory chain complex I assembly (GO:0032981)	22	8	1.43	+	5.58	0.000336	0.0187
cilium-dependent cell motility (GO:0060285)	36	13	2.35	+	5.54	5.29e-06	0.000621
cilium or flagellum-dependent cell motility (GO:0001539)	36	13	2.35	+	5.54	5.29e-06	0.000614
respiratory electron transport chain (GO:0022904)	68	24	4.43	+	5.42	9.13e-10	2.86e-07
detection of mechanical stimulus involved in sensory perception (GO:0050974)	20	7	1.3	+	5.37	0.00095	0.0429
photoreceptor cell maintenance (GO:0045494)	29	10	1.89	+	5.29	8.85e-05	0.00644
sensory perception of sound (GO:0007605)	59	19	3.84	+	4.94	1.66e-07	2.99e-05
non-motile cilium assembly (GO:1905515)	25	8	1.63	+	4.91	0.000676	0.0321
electron transport chain (GO:0022900)	75	24	4.89	+	4.91	4.52e-09	1.21e-06
ribonucleoside triphosphate biosynthetic process (GO:0009201)	47	15	3.06	+	4.9	3.58e-06	0.000448
cellular iron ion homeostasis (GO:0006879)	29	9	1.89	+	4.76	0.00038	0.0205
nucleoside triphosphate biosynthetic process (GO:0009142)	58	18	3.78	+	4.76	5.47e-07	8.42e-05
camera-type eye photoreceptor cell differentiation (GO:0060219)	33	10	2.15	+	4.65	0.000213	0.0132
eye photoreceptor cell development (GO:0042462)	44	13	2.87	+	4.53	3.12e-05	0.00274
iron ion transport (GO:0006826)	34	10	2.22	+	4.51	0.000261	0.0156
response to temperature stimulus (GO:0009266)	55	16	3.58	+	4.46	4.63e-06	0.000551
inner ear receptor cell development (GO:0060119)	38	11	2.48	+	4.44	0.000146	0.00981
extracellular transport (GO:0006858)	35	10	2.28	+	4.38	0.000317	0.0183
aerobic respiration (GO:0009060)	98	28	6.39	+	4.38	2.02e-09	5.94e-07
epithelial cilium movement involved in extracellular fluid movement (GO:0003351)	35	10	2.28	+	4.38	0.000317	0.0182
sensory perception of mechanical stimulus (GO:0050954)	68	19	4.43	+	4.29	1.02e-06	0.000141
retina homeostasis (GO:0001895)	36	10	2.35	+	4.26	0.000384	0.0205
regulation of G protein-coupled receptor signaling pathway (GO:0008277)	47	13	3.06	+	4.24	5.54e-05	0.00441
maintenance of location in cell (GO:0051651)	40	11	2.61	+	4.22	0.000213	0.0131
axoneme assembly (GO:0035082)	62	17	4.04	+	4.21	4.61e-06	0.000555
phototransduction (GO:0007602)	48	13	3.13	+	4.16	6.65e-05	0.00508
eye photoreceptor cell differentiation (GO:0001754)	63	17	4.11	+	4.14	5.52e-06	0.000633
cytoplasmic translation (GO:0002181)	56	15	3.65	+	4.11	2.09e-05	0.00196
cellular response to light stimulus (GO:0071482)	60	16	3.91	+	4.09	1.17e-05	0.00117
axonemal dynein complex assembly (GO:0070286)	34	9	2.22	+	4.06	0.000997	0.0442
cilium movement (GO:0003341)	95	25	6.19	+	4.04	5.69e-08	1.27e-05
inner ear receptor cell differentiation (GO:0060113)	46	12	3	+	4	0.00017	0.0108
detection of light stimulus (GO:0009583)	58	15	3.78	+	3.97	2.96e-05	0.00262
neuromuscular process (GO:0050905)	51	13	3.32	+	3.91	0.000112	0.00786
synaptic vesicle exocytosis (GO:0016079)	51	13	3.32	+	3.91	0.000112	0.00781
purine ribonucleoside triphosphate metabolic process (GO:0009205)	91	23	5.93	+	3.88	3.51e-07	5.79e-05
purine nucleoside triphosphate metabolic process (GO:0009144)	95	24	6.19	+	3.88	1.98e-07	3.45e-05
ATP metabolic process (GO:0046034)	76	19	4.95	+	3.84	4.1e-06	0.000501
hair cell differentiation (GO:0035315)	61	15	3.98	+	3.77	4.86e-05	0.00404
lens development in camera-type eye (GO:0002088)	114	28	7.43	+	3.77	3.28e-08	7.91e-06
detection of abiotic stimulus (GO:0009582)	94	23	6.13	+	3.75	5.71e-07	8.65e-05
detection of external stimulus (GO:0009581)	94	23	6.13	+	3.75	5.71e-07	8.51e-05
mechanoreceptor differentiation (GO:0042490)	66	16	4.3	+	3.72	3.19e-05	0.00278
iron ion homeostasis (GO:0055072)	50	12	3.26	+	3.68	0.000328	0.0186
ribonucleoside triphosphate metabolic process (GO:0009199)	100	24	6.52	+	3.68	4.41e-07	7.02e-05
photoreceptor cell development (GO:0042461)	75	18	4.89	+	3.68	1.18e-05	0.00116
regulation of calcium ion transmembrane transport (GO:1903169)	46	11	3	+	3.67	0.00059	0.0289
response to oxidative stress (GO:0006979)	80	19	5.21	+	3.64	7.73e-06	0.000845
cellular respiration (GO:0045333)	118	28	7.69	+	3.64	6.13e-08	1.31e-05
photoreceptor cell differentiation (GO:0046530)	97	23	6.32	+	3.64	9.11e-07	0.000132
sensory perception (GO:0007600)	401	94	26.13	+	3.6	4.64e-23	1.45e-19
nucleoside triphosphate metabolic process (GO:0009141)	116	27	7.56	+	3.57	1.46e-07	2.7e-05
cellular response to radiation (GO:0071478)	69	16	4.5	+	3.56	5.06e-05	0.00414
neurotransmitter secretion (GO:0007269)	70	16	4.56	+	3.51	5.87e-05	0.00456
signal release from synapse (GO:0099643)	70	16	4.56	+	3.51	5.87e-05	0.00452
translational initiation (GO:0006413)	66	15	4.3	+	3.49	0.000105	0.00738
nucleoside diphosphate phosphorylation (GO:0006165)	58	13	3.78	+	3.44	0.000333	0.0187
nucleotide phosphorylation (GO:0046939)	59	13	3.84	+	3.38	0.000384	0.0204
response to light stimulus (GO:0009416)	142	31	9.25	+	3.35	6.34e-08	1.32e-05
microtubule bundle formation (GO:0001578)	79	17	5.15	+	3.3	6.7e-05	0.00503
epidermal cell differentiation (GO:0009913)	86	18	5.6	+	3.21	5.66e-05	0.00447
neurotransmitter transport (GO:0006836)	93	19	6.06	+	3.14	4.74e-05	0.00401
nervous system process (GO:0050877)	590	115	38.45	+	2.99	3.3e-22	7.75e-19
energy derivation by oxidation of organic compounds (GO:0015980)	155	30	10.1	+	2.97	9.55e-07	0.000134
epidermis development (GO:0008544)	110	21	7.17	+	2.93	4.63e-05	0.00395
cellular response to abiotic stimulus (GO:0071214)	84	16	5.47	+	2.92	0.000365	0.0199
cellular response to environmental stimulus (GO:0104004)	84	16	5.47	+	2.92	0.000365	0.0198
transition metal ion homeostasis (GO:0055076)	75	14	4.89	+	2.86	0.000986	0.0439
generation of precursor metabolites and energy (GO:0006091)	219	40	14.27	+	2.8	6.34e-08	1.3e-05
peptide biosynthetic process (GO:0043043)	325	59	21.18	+	2.79	8.82e-11	3.77e-08
cilium organization (GO:0044782)	342	62	22.29	+	2.78	2.87e-11	1.42e-08
inner ear morphogenesis (GO:0042472)	95	17	6.19	+	2.75	0.000458	0.0235
cilium assembly (GO:0060271)	319	57	20.79	+	2.74	2.67e-10	9.66e-08
cellular response to xenobiotic stimulus (GO:0071466)	84	15	5.47	+	2.74	0.000985	0.0441
ear morphogenesis (GO:0042471)	96	17	6.26	+	2.72	0.000509	0.0258
response to radiation (GO:0009314)	176	31	11.47	+	2.7	5.59e-06	0.000633
translation (GO:0006412)	318	56	20.72	+	2.7	5.68e-10	1.91e-07
signal release (GO:0023061)	91	16	5.93	+	2.7	0.000785	0.0365
purine ribonucleotide biosynthetic process (GO:0009152)	138	24	8.99	+	2.67	5.17e-05	0.00419
synaptic vesicle cycle (GO:0099504)	104	18	6.78	+	2.66	0.00045	0.0235
vesicle-mediated transport in synapse (GO:0099003)	104	18	6.78	+	2.66	0.00045	0.0233
purine nucleotide biosynthetic process (GO:0006164)	142	24	9.25	+	2.59	0.000104	0.0074
plasma membrane bounded cell projection assembly (GO:0120031)	351	59	22.87	+	2.58	9.99e-10	3.03e-07
inner ear development (GO:0048839)	179	30	11.66	+	2.57	1.38e-05	0.00134
ear development (GO:0043583)	181	30	11.79	+	2.54	1.61e-05	0.00154
amide biosynthetic process (GO:0043604)	419	68	27.3	+	2.49	1.91e-10	7.48e-08
microtubule-based movement (GO:0007018)	253	41	16.49	+	2.49	8.84e-07	0.00013
protein folding (GO:0006457)	161	26	10.49	+	2.48	8.41e-05	0.00623
camera-type eye development (GO:0043010)	471	76	30.69	+	2.48	2.46e-11	1.36e-08
ribonucleotide biosynthetic process (GO:0009260)	155	25	10.1	+	2.48	0.000118	0.00814
cell projection assembly (GO:0030031)	372	60	24.24	+	2.48	3e-09	8.29e-07
eye development (GO:0001654)	548	88	35.71	+	2.46	9.17e-13	7.83e-10
visual system development (GO:0150063)	548	88	35.71	+	2.46	9.17e-13	7.18e-10
purine-containing compound biosynthetic process (GO:0072522)	150	24	9.77	+	2.46	0.000178	0.0113
response to abiotic stimulus (GO:0009628)	389	62	25.35	+	2.45	2.2e-09	6.27e-07
peptide metabolic process (GO:0006518)	427	68	27.83	+	2.44	4.8e-10	1.67e-07
sensory system development (GO:0048880)	658	103	42.88	+	2.4	2.71e-14	4.24e-11
ribose phosphate biosynthetic process (GO:0046390)	160	25	10.43	+	2.4	0.000272	0.0162
sensory organ development (GO:0007423)	732	111	47.7	+	2.33	2.56e-14	4.82e-11
nucleoside phosphate biosynthetic process (GO:1901293)	200	28	13.03	+	2.15	0.000423	0.0222
mitochondrion organization (GO:0007005)	253	35	16.49	+	2.12	0.000102	0.00733
sensory organ morphogenesis (GO:0090596)	312	42	20.33	+	2.07	4.41e-05	0.0038
system process (GO:0003008)	945	127	61.58	+	2.06	6.4e-13	6.68e-10
cellular nitrogen compound biosynthetic process (GO:0044271)	928	123	60.47	+	2.03	4.27e-12	2.87e-09
organelle assembly (GO:0070925)	629	83	40.99	+	2.02	1.83e-08	4.64e-06
retina development in camera-type eye (GO:0060041)	276	36	17.99	+	2	0.000294	0.0171
purine nucleotide metabolic process (GO:0006163)	261	34	17.01	+	2	0.000353	0.0195
purine ribonucleotide metabolic process (GO:0009150)	246	32	16.03	+	2	0.000579	0.0286
cellular amide metabolic process (GO:0043603)	618	80	40.27	+	1.99	5.95e-08	1.3e-05
purine-containing compound metabolic process (GO:0072521)	287	36	18.7	+	1.92	0.000594	0.0289
ribonucleotide metabolic process (GO:0009259)	266	33	17.33	+	1.9	0.000962	0.0433
protein-containing complex assembly (GO:0065003)	652	80	42.49	+	1.88	4.47e-07	7e-05
protein-containing complex organization (GO:0043933)	746	90	48.61	+	1.85	2.16e-07	3.62e-05
microtubule-based process (GO:0007017)	585	70	38.12	+	1.84	6.69e-06	0.00074
ribonucleoprotein complex biogenesis (GO:0022613)	337	40	21.96	+	1.82	0.000709	0.0335
nucleotide metabolic process (GO:0009117)	350	41	22.81	+	1.8	0.000869	0.0396
cellular component assembly (GO:0022607)	1538	176	100.22	+	1.76	8.71e-12	5.45e-09
nucleobase-containing small molecule metabolic process (GO:0055086)	423	48	27.56	+	1.74	0.000613	0.0296
cellular component biogenesis (GO:0044085)	1728	196	112.61	+	1.74	8.04e-13	7.55e-10
cell projection organization (GO:0030030)	978	110	63.73	+	1.73	1.98e-07	3.39e-05
plasma membrane bounded cell projection organization (GO:0120036)	955	107	62.23	+	1.72	4.01e-07	6.5e-05
organonitrogen compound biosynthetic process (GO:1901566)	1103	123	71.88	+	1.71	6.4e-08	1.28e-05
ion transmembrane transport (GO:0034220)	675	75	43.99	+	1.71	2.72e-05	0.00243
cation transmembrane transport (GO:0098655)	508	56	33.1	+	1.69	0.000355	0.0195
cellular macromolecule biosynthetic process (GO:0034645)	697	76	45.42	+	1.67	4.84e-05	0.00406
homeostatic process (GO:0042592)	693	74	45.16	+	1.64	0.00012	0.00822
cation transport (GO:0006812)	666	71	43.4	+	1.64	0.000167	0.0108
establishment of localization in cell (GO:0051649)	1154	119	75.2	+	1.58	3.6e-06	0.000446
organic cyclic compound biosynthetic process (GO:1901362)	612	63	39.88	+	1.58	0.000822	0.0377
macromolecule biosynthetic process (GO:0009059)	936	96	60.99	+	1.57	4.89e-05	0.00403
organic substance biosynthetic process (GO:1901576)	1727	177	112.54	+	1.57	1.79e-08	4.66e-06
cellular localization (GO:0051641)	1663	170	108.37	+	1.57	4.31e-08	1.01e-05
cellular biosynthetic process (GO:0044249)	1665	170	108.5	+	1.57	4.4e-08	1.01e-05
establishment of protein localization (GO:0045184)	791	80	51.55	+	1.55	0.000306	0.0177
intracellular transport (GO:0046907)	970	97	63.21	+	1.53	8.79e-05	0.00646
biosynthetic process (GO:0009058)	1773	177	115.54	+	1.53	1.04e-07	1.99e-05
protein transport (GO:0015031)	764	76	49.79	+	1.53	0.000724	0.0339
transport (GO:0006810)	3107	309	202.47	+	1.53	4.34e-13	5.1e-10
establishment of localization (GO:0051234)	3179	316	207.16	+	1.53	2.35e-13	3.15e-10
ion transport (GO:0006811)	1048	104	68.29	+	1.52	7.06e-05	0.00526
macromolecule localization (GO:0033036)	1441	141	93.9	+	1.5	6.65e-06	0.000744
organic substance transport (GO:0071702)	1353	131	88.17	+	1.49	2.16e-05	0.00201
transmembrane transport (GO:0055085)	1106	107	72.07	+	1.48	0.000137	0.00927
nitrogen compound transport (GO:0071705)	1008	97	65.69	+	1.48	0.000322	0.0183
localization (GO:0051179)	3502	336	228.21	+	1.47	2.5e-12	1.81e-09
organelle organization (GO:0006996)	2218	210	144.54	+	1.45	1.95e-07	3.45e-05
protein localization (GO:0008104)	1126	105	73.38	+	1.43	0.000628	0.0301
cellular macromolecule localization (GO:0070727)	1128	105	73.51	+	1.43	0.000635	0.0303
gene expression (GO:0010467)	1416	128	92.27	+	1.39	0.000452	0.0233
cellular nitrogen compound metabolic process (GO:0034641)	2474	216	161.22	+	1.34	2.65e-05	0.00239
multicellular organismal process (GO:0032501)	5021	434	327.19	+	1.33	8.33e-10	2.7e-07
regulation of biological quality (GO:0065008)	1945	167	126.75	+	1.32	0.00055	0.0275
cellular component organization or biogenesis (GO:0071840)	4184	358	272.65	+	1.31	1.41e-07	2.64e-05
animal organ development (GO:0048513)	2727	232	177.7	+	1.31	6.68e-05	0.00506
cellular component organization (GO:0016043)	4005	339	260.99	+	1.3	9.17e-07	0.000131
system development (GO:0048731)	3449	289	224.75	+	1.29	1.69e-05	0.0016
multicellular organism development (GO:0007275)	4061	334	264.63	+	1.26	1.26e-05	0.00123
cellular metabolic process (GO:0044237)	5741	458	374.11	+	1.22	3.39e-06	0.000431
anatomical structure development (GO:0048856)	4629	359	301.65	+	1.19	0.000532	0.0269
developmental process (GO:0032502)	4819	372	314.03	+	1.18	0.000574	0.0285
metabolic process (GO:0008152)	7262	545	473.23	+	1.15	0.000202	0.0126
cellular process (GO:0009987)	15071	1093	982.1	+	1.11	8.09e-08	1.58e-05
biological_process (GO:0008150)	20346	1434	1325.85	+	1.08	4.67e-11	2.09e-08
regulation of biological process (GO:0050789)	10373	599	675.96	-	0.89	0.00019	0.012
regulation of cellular process (GO:0050794)	9827	565	640.38	-	0.88	0.000223	0.0135
cellular response to stimulus (GO:0051716)	4916	257	320.35	-	0.8	9.61e-05	0.00695
regulation of gene expression (GO:0010468)	3534	178	230.29	-	0.77	0.000227	0.0137
regulation of biosynthetic process (GO:0009889)	3200	161	208.53	-	0.77	0.000466	0.0238
regulation of cellular biosynthetic process (GO:0031326)	3177	158	207.03	-	0.76	0.000286	0.0169
regulation of nucleobase-containing compound metabolic process (GO:0019219)	3263	162	212.63	-	0.76	0.000214	0.0131
cell communication (GO:0007154)	4416	219	287.77	-	0.76	8.83e-06	0.000942
regulation of macromolecule biosynthetic process (GO:0010556)	3136	154	204.36	-	0.75	0.000167	0.0108
regulation of RNA metabolic process (GO:0051252)	3142	153	204.75	-	0.75	0.000122	0.00829
signaling (GO:0023052)	4373	211	284.97	-	0.74	1.55e-06	0.000209
regulation of transcription by RNA polymerase II (GO:0006357)	2239	107	145.9	-	0.73	0.00072	0.0338
regulation of DNA-templated transcription (GO:0006355)	2913	133	189.83	-	0.7	9.88e-06	0.00103
regulation of nucleic acid-templated transcription (GO:1903506)	2914	133	189.89	-	0.7	9.89e-06	0.00102
regulation of RNA biosynthetic process (GO:2001141)	2916	133	190.02	-	0.7	9.93e-06	0.00101
Unclassified (UNCLASSIFIED)	5358	241	349.15	-	0.69	4.67e-11	2.2e-08
signal transduction (GO:0007165)	4075	183	265.55	-	0.69	2.39e-08	5.92e-06
cell surface receptor signaling pathway (GO:0007166)	1350	46	87.97	-	0.52	1.32e-06	0.00018
DNA metabolic process (GO:0006259)	483	14	31.47	-	0.44	0.000896	0.0407
cell adhesion (GO:0007155)	690	18	44.96	-	0.4	1.07e-05	0.00108
immune response (GO:0006955)	591	12	38.51	-	0.31	1.75e-06	0.000231
regulation of immune response (GO:0050776)	308	6	20.07	-	0.3	0.000538	0.027
protein autophosphorylation (GO:0046777)	293	3	19.09	-	0.16	2.29e-05	0.00209
positive regulation of immune response (GO:0050778)	206	2	13.42	-	0.15	0.000385	0.0203
DNA recombination (GO:0006310)	152	1	9.91	-	0.1	0.00112	0.0492
activation of immune response (GO:0002253)	176	1	11.47	-	0.09	0.000381	0.0205
immune response-activating cell surface receptor signaling pathway (GO:0002429)	126	0	8.21	-	< 0.01	0.000582	0.0286
immune response-activating signal transduction (GO:0002757)	128	0	8.34	-	< 0.01	0.000596	0.0289

## Sheet: Table S4 Microtubule genes
4TU-UPRT enriched genes mapped to microtubule-associated GO terms GO:0001539, GO:0001578, GO:0003341, GO:0003351, GO:0007017, GO:0007018, GO:0035082, GO:0044782, GO:0060271, GO:0060285, GO:0070286, GO:1905515
Gene ID	Mapped IDs	Gene Name; Gene Symbol. Persistent id; Orthologs	PANTHER Family/Subfamily	PANTHER Protein Class
DANRE|ZFIN=ZDB-GENE-010717-1|UniProtKB=Q90ZE2	ZDB-GENE-010717-1	Zinc finger protein 703;znf703;PTN000282362;orthologs	ZINC FINGER PROTEIN 703 (PTHR12522:SF2)
DANRE|ZFIN=ZDB-GENE-030131-1531|UniProtKB=Q6PGV1	ZDB-GENE-030131-1531	V-type proton ATPase subunit d 1;atp6v0d1;PTN000112005;orthologs	V-TYPE PROTON ATPASE SUBUNIT D 1 (PTHR11028:SF0)	ATP synthase(PC00002)
DANRE|ZFIN=ZDB-GENE-030131-1980|UniProtKB=F1QNW4	ZDB-GENE-030131-1980	Dynein regulatory complex subunit 4;gas8;PTN000774894;orthologs	DYNEIN REGULATORY COMPLEX SUBUNIT 4 (PTHR31543:SF0)	microtubule or microtubule-binding cytoskeletal protein(PC00157)
DANRE|ZFIN=ZDB-GENE-030131-215|UniProtKB=Q6TH32	ZDB-GENE-030131-215	Cofilin 1;cfl1;PTN000227349;orthologs	COFILIN 1-RELATED (PTHR11913:SF53)	non-motor actin binding protein(PC00165)
DANRE|ZFIN=ZDB-GENE-030131-574|UniProtKB=F1QVN7	ZDB-GENE-030131-574	Intraflagellar transport 88 homolog;ift88;PTN000555546;orthologs	INTRAFLAGELLAR TRANSPORT PROTEIN 88 HOMOLOG (PTHR44117:SF1)
DANRE|ZFIN=ZDB-GENE-030131-7279|UniProtKB=F1QUT2	ZDB-GENE-030131-7279	Male germ cell-associated kinase;mak;PTN000622225;orthologs	SERINE/THREONINE-PROTEIN KINASE MAK (PTHR24055:SF194)	non-receptor serine/threonine protein kinase(PC00167)
DANRE|ZFIN=ZDB-GENE-030131-825|UniProtKB=Q7T2E3	ZDB-GENE-030131-825	Casein kinase I isoform delta-A;csnk1da;PTN000226328;orthologs	CASEIN KINASE I ISOFORM EPSILON (PTHR11909:SF428)	non-receptor serine/threonine protein kinase(PC00167)
DANRE|ZFIN=ZDB-GENE-030131-8783|UniProtKB=Q52WY2	ZDB-GENE-030131-8783	Cell division control protein 42 homolog;cdc42;PTN000633109;orthologs	CELL DIVISION CONTROL PROTEIN 42 HOMOLOG (PTHR24072:SF337)	small GTPase(PC00208)
DANRE|ZFIN=ZDB-GENE-030219-90|UniProtKB=F1Q6W8	ZDB-GENE-030219-90	Bardet-Biedl syndrome 7 protein homolog;bbs7;PTN000783658;orthologs	BARDET-BIEDL SYNDROME 7 PROTEIN (PTHR16074:SF4)
DANRE|ZFIN=ZDB-GENE-030429-30|UniProtKB=Q1LU98	ZDB-GENE-030429-30	Geminin DNA replication inhibitor;gmnn;PTN000332513;orthologs	GEMININ (PTHR13372:SF4)
DANRE|ZFIN=ZDB-GENE-030521-42|UniProtKB=Q6PBA8	ZDB-GENE-030521-42	Meiosis-specific nuclear structural protein 1;mns1;PTN000443904;orthologs	MEIOSIS-SPECIFIC NUCLEAR STRUCTURAL PROTEIN 1 (PTHR19265:SF0)	structural protein(PC00211)
DANRE|ZFIN=ZDB-GENE-030616-3|UniProtKB=Q5ICW6	ZDB-GENE-030616-3	Protocadherin 15a;pcdh15a;PTN000618113;orthologs	PROTOCADHERIN 15A (PTHR24028:SF297)	cadherin(PC00057)
DANRE|ZFIN=ZDB-GENE-030616-623|UniProtKB=F1Q6J7	ZDB-GENE-030616-623	Dynein, axonemal, heavy chain 6;dnah6;PTN000840103;orthologs	DYNEIN AXONEMAL HEAVY CHAIN 6 (PTHR10676:SF339)	microtubule binding motor protein(PC00156)
DANRE|ZFIN=ZDB-GENE-030826-21|UniProtKB=F1R789	ZDB-GENE-030826-21	Centrin 4;cetn4;PTN000549784;orthologs	CENTRIN 4 (PTHR23050:SF500)	calmodulin-related(PC00061)
DANRE|ZFIN=ZDB-GENE-031001-10|UniProtKB=Q32TF8	ZDB-GENE-031001-10	EF-hand domain-containing family member C2;efhc2;PTN000250081;orthologs	EF-HAND DOMAIN-CONTAINING FAMILY MEMBER C2 (PTHR12086:SF11)	calmodulin-related(PC00061)
DANRE|ZFIN=ZDB-GENE-040113-1|UniProtKB=Q1L952	ZDB-GENE-040113-1	Tektin;tekt2;PTN000462331;orthologs	TEKTIN (PTHR19960:SF7)	non-motor microtubule binding protein(PC00166)
DANRE|ZFIN=ZDB-GENE-040322-2|UniProtKB=Q6DHM9	ZDB-GENE-040322-2	Rho-related GTP-binding protein RhoA-B;rhoab;PTN001938681;orthologs	RHO-RELATED GTP-BINDING PROTEIN RHOA-B (PTHR24072:SF369)	small GTPase(PC00208)
DANRE|ZFIN=ZDB-GENE-040426-1169|UniProtKB=F1R646	ZDB-GENE-040426-1169	G protein-signaling modulator 2;gpsm2;PTN000009995;orthologs	G-PROTEIN-SIGNALING MODULATOR 2 (PTHR45954:SF3)
DANRE|ZFIN=ZDB-GENE-040426-1214|UniProtKB=A8DZH6	ZDB-GENE-040426-1214	Cell division cycle 14Aa;cdc14aa;PTN000597026;orthologs	CELL DIVISION CYCLE 14AA-RELATED (PTHR23339:SF121)	protein phosphatase(PC00195)
DANRE|ZFIN=ZDB-GENE-040426-1300|UniProtKB=F1Q8A4	ZDB-GENE-040426-1300	EF-hand domain (C-terminal)-containing 1;efhc1;PTN000250118;orthologs	EF-HAND DOMAIN-CONTAINING PROTEIN 1 (PTHR12086:SF9)	calmodulin-related(PC00061)
DANRE|ZFIN=ZDB-GENE-040426-1494|UniProtKB=Q6PE45	ZDB-GENE-040426-1494	Protein RER1;rer1;PTN002243170;orthologs	PROTEIN RER1 (PTHR10743:SF0)
DANRE|ZFIN=ZDB-GENE-040426-1784|UniProtKB=Q6PBJ2	ZDB-GENE-040426-1784	Cilia- and flagella-associated protein 20;cfap20;PTN000279063;orthologs	CILIA- AND FLAGELLA-ASSOCIATED PROTEIN 20 (PTHR12458:SF8)
DANRE|ZFIN=ZDB-GENE-040426-1790|UniProtKB=F1QKW5	ZDB-GENE-040426-1790	ADP-ribosylation factor-like 13A;arl13a;PTN000196277;orthologs	ADP-RIBOSYLATION FACTOR-LIKE PROTEIN 13A (PTHR46090:SF1)
DANRE|ZFIN=ZDB-GENE-040426-1867|UniProtKB=Q1L9G1	ZDB-GENE-040426-1867	Zgc:77752;zgc:77752;PTN000597086;orthologs	TYR_PHOSPHATASE_2 DOMAIN-CONTAINING PROTEIN-RELATED (PTHR23339:SF93)	protein phosphatase(PC00195)
DANRE|ZFIN=ZDB-GENE-040426-1943|UniProtKB=Q7ZVC2	ZDB-GENE-040426-1943	Clusterin-associated protein 1 homolog;cluap1;PTN000489158;orthologs	CLUSTERIN-ASSOCIATED PROTEIN 1 (PTHR21547:SF0)
DANRE|ZFIN=ZDB-GENE-040426-2385|UniProtKB=Q6P3K7	ZDB-GENE-040426-2385	Casein kinase I isoform delta-B;csnk1db;PTN000226327;orthologs	CASEIN KINASE I ISOFORM DELTA (PTHR11909:SF18)	non-receptor serine/threonine protein kinase(PC00167)
DANRE|ZFIN=ZDB-GENE-040426-2732|UniProtKB=Q5RIC7	ZDB-GENE-040426-2732	Stathmin;stmn4;PTN000010237;orthologs	STATHMIN-4 (PTHR10104:SF6)	non-motor microtubule binding protein(PC00166)
DANRE|ZFIN=ZDB-GENE-040426-2879|UniProtKB=Q6IQJ2	ZDB-GENE-040426-2879	Tubulin beta chain;zgc:55461;PTN000172796;orthologs	TUBULIN BETA-4A CHAIN (PTHR11588:SF253)	tubulin(PC00228)
DANRE|ZFIN=ZDB-GENE-040426-899|UniProtKB=Q6NV13	ZDB-GENE-040426-899	Nuclear distribution protein C homolog;nudc;PTN000270307;orthologs	NUCLEAR MIGRATION PROTEIN NUDC (PTHR12356:SF3)	microtubule or microtubule-binding cytoskeletal protein(PC00157)
DANRE|ZFIN=ZDB-GENE-040426-989|UniProtKB=Q7ZUX8	ZDB-GENE-040426-989	Dynein light chain roadblock;dynlrb1;PTN000081563;orthologs	DYNEIN LIGHT CHAIN ROADBLOCK-TYPE 1 (PTHR10779:SF17)	microtubule or microtubule-binding cytoskeletal protein(PC00157)
DANRE|ZFIN=ZDB-GENE-040614-1|UniProtKB=Q6IVW0	ZDB-GENE-040614-1	Intraflagellar transport protein 57 homolog;ift57;PTN000410721;orthologs	INTRAFLAGELLAR TRANSPORT PROTEIN 57 HOMOLOG (PTHR16011:SF0)	structural protein(PC00211)
DANRE|ZFIN=ZDB-GENE-040614-2|UniProtKB=Q66I67	ZDB-GENE-040614-2	Intraflagellar transport protein 20 homolog;ift20;PTN000780947;orthologs	INTRAFLAGELLAR TRANSPORT PROTEIN 20 HOMOLOG (PTHR31978:SF1)
DANRE|ZFIN=ZDB-GENE-040614-3|UniProtKB=A8DZG0	ZDB-GENE-040614-3	Intraflagellar transport 52 homolog (Chlamydomonas);ift52;PTN000311774;orthologs	INTRAFLAGELLAR TRANSPORT PROTEIN 52 HOMOLOG (PTHR12969:SF7)
DANRE|ZFIN=ZDB-GENE-040722-2|UniProtKB=A0A2R8QDB5	ZDB-GENE-040722-2	PIH1 domain containing 3;dnaaf6;PTN000472368;orthologs	DYNEIN AXONEMAL ASSEMBLY FACTOR 6 (PTHR21083:SF0)
DANRE|ZFIN=ZDB-GENE-040724-165|UniProtKB=F1QG20	ZDB-GENE-040724-165	Intraflagellar transport 140 homolog (Chlamydomonas);ift140;PTN000404390;orthologs	INTRAFLAGELLAR TRANSPORT PROTEIN 140 HOMOLOG (PTHR15722:SF7)	structural protein(PC00211)
DANRE|ZFIN=ZDB-GENE-040801-178|UniProtKB=Q6DHB1	ZDB-GENE-040801-178	Dynein axonemal light chain 1;dnal1;PTN002392342;orthologs	DYNEIN AXONEMAL LIGHT CHAIN 1 (PTHR15454:SF7)	scaffold/adaptor protein(PC00226)
DANRE|ZFIN=ZDB-GENE-040827-1|UniProtKB=Q5RHH4	ZDB-GENE-040827-1	Intraflagellar transport protein 172 homolog;ift172;PTN000404439;orthologs	INTRAFLAGELLAR TRANSPORT PROTEIN 172 HOMOLOG (PTHR15722:SF2)	structural protein(PC00211)
DANRE|ZFIN=ZDB-GENE-040930-8|UniProtKB=Q6DRC3	ZDB-GENE-040930-8	Cilia- and flagella-associated protein 298;cfap298;PTN000326275;orthologs	CILIA- AND FLAGELLA-ASSOCIATED PROTEIN 298 (PTHR13238:SF0)
DANRE|ZFIN=ZDB-GENE-041001-218|UniProtKB=F1QRC1	ZDB-GENE-041001-218	Dynein regulatory complex protein 1;drc1;PTN000492874;orthologs	DYNEIN REGULATORY COMPLEX PROTEIN 1 (PTHR21625:SF1)
DANRE|ZFIN=ZDB-GENE-041010-153|UniProtKB=B7ZDB1	ZDB-GENE-041010-153	Leucine-rich repeat-containing 23;lrrc23;PTN002546712;orthologs	LEUCINE-RICH REPEAT-CONTAINING PROTEIN 23 (PTHR15454:SF47)	scaffold/adaptor protein(PC00226)
DANRE|ZFIN=ZDB-GENE-041010-163|UniProtKB=Q5XJN6	ZDB-GENE-041010-163	Coiled-coil domain-containing protein 113;ccdc113;PTN000402251;orthologs	COILED-COIL DOMAIN-CONTAINING PROTEIN 113 (PTHR15654:SF2)
DANRE|ZFIN=ZDB-GENE-041010-85|UniProtKB=E7FE68	ZDB-GENE-041010-85	Stathmin;stmn2a;PTN000010267;orthologs	STATHMIN-2 (PTHR10104:SF18)	non-motor microtubule binding protein(PC00166)
DANRE|ZFIN=ZDB-GENE-041014-337|UniProtKB=A0A2R9YJL3	ZDB-GENE-041014-337	Cilia- and flagella-associated protein 206;ak9;PTN000599864;orthologs	CILIA- AND FLAGELLA-ASSOCIATED PROTEIN 206 (PTHR23359:SF247)	nucleotide kinase(PC00172)
DANRE|ZFIN=ZDB-GENE-041111-243|UniProtKB=P85001	ZDB-GENE-041111-243	Centrosomal protein of 290 kDa;cep290;PTN000430146;orthologs	CENTROSOMAL PROTEIN OF 290 KDA (PTHR18879:SF20)
DANRE|ZFIN=ZDB-GENE-041114-110|UniProtKB=F1QW87	ZDB-GENE-041114-110	Coiled-coil domain containing 114;odad1;PTN000495757;orthologs	OUTER DYNEIN ARM-DOCKING COMPLEX SUBUNIT 1 (PTHR21694:SF35)
DANRE|ZFIN=ZDB-GENE-041114-99|UniProtKB=A0A0R4IRF0	ZDB-GENE-041114-99	Tektin;tekt1;PTN000462294;orthologs	TEKTIN-1 (PTHR19960:SF25)	non-motor microtubule binding protein(PC00166)
DANRE|ZFIN=ZDB-GENE-041210-152|UniProtKB=Q5RHB5	ZDB-GENE-041210-152	Inositol 1,4,5-triphosphate receptor associated 2;irag2;PTN000394523;orthologs	INOSITOL 1,4,5-TRIPHOSPHATE RECEPTOR ASSOCIATED 2 (PTHR15352:SF3)	scaffold/adaptor protein(PC00226)
DANRE|ZFIN=ZDB-GENE-041212-76|UniProtKB=F1R8Z9	ZDB-GENE-041212-76	Forkhead box protein J1-B;foxj1b;PTN000215373;orthologs	FORKHEAD BOX PROTEIN J1-B (PTHR46805:SF3)
DANRE|ZFIN=ZDB-GENE-050119-3|UniProtKB=F1QN54	ZDB-GENE-050119-3	Kinesin-like protein KIF3B;kif3b;PTN000650177;orthologs	KINESIN-LIKE PROTEIN KIF3B (PTHR24115:SF744)	microtubule binding motor protein(PC00156)
DANRE|ZFIN=ZDB-GENE-050208-417|UniProtKB=F1R6J1	ZDB-GENE-050208-417	Si:dkey-121a11.3;si:dkey-121a11.3;PTN000364014;orthologs	CDNA SEQUENCE BC034090 (PTHR14102:SF12)	tight junction(PC00214)
DANRE|ZFIN=ZDB-GENE-050320-39|UniProtKB=Q5BJJ7	ZDB-GENE-050320-39	Protein BCCIP homolog;bccip;PTN000327485;orthologs	BRCA2 AND CDKN1A-INTERACTING PROTEIN (PTHR13261:SF0)
DANRE|ZFIN=ZDB-GENE-050417-451|UniProtKB=Q567Z6	ZDB-GENE-050417-451	Cysteine-rich PDZ-binding protein;cript;PTN001720581;orthologs	CYSTEINE-RICH PDZ-BINDING PROTEIN (PTHR11805:SF1)
DANRE|ZFIN=ZDB-GENE-050419-109|UniProtKB=A3KQH2	ZDB-GENE-050419-109	Dynein regulatory complex protein 9;iqcg;PTN001028588;orthologs	DYNEIN REGULATORY COMPLEX PROTEIN 9 (PTHR14871:SF1)	microtubule or microtubule-binding cytoskeletal protein(PC00157)
DANRE|ZFIN=ZDB-GENE-050419-219|UniProtKB=F1R516	ZDB-GENE-050419-219	HYDIN axonemal central pair apparatus protein;hydin;PTN001127984;orthologs	HYDROCEPHALUS-INDUCING PROTEIN HOMOLOG (PTHR23053:SF0)
DANRE|ZFIN=ZDB-GENE-050419-255|UniProtKB=Q1LV15	ZDB-GENE-050419-255	Dynein assembly factor with WDR repeat domains 1;daw1;PTN000521971;orthologs	DYNEIN ASSEMBLY FACTOR WITH WDR REPEAT DOMAINS 1 (PTHR44156:SF1)
DANRE|ZFIN=ZDB-GENE-050506-1|UniProtKB=A0A2R8RQB1	ZDB-GENE-050506-1	Dynein, axonemal, heavy polypeptide 9-like;dnah9l;PTN000840179;orthologs	DYNEIN AXONEMAL HEAVY CHAIN 9 (PTHR10676:SF257)	microtubule binding motor protein(PC00156)
DANRE|ZFIN=ZDB-GENE-050522-296|UniProtKB=A0A2R8RKB7	ZDB-GENE-050522-296	Cilia and flagella-associated protein 52;cfap52;PTN000346968;orthologs	CILIA- AND FLAGELLA-ASSOCIATED PROTEIN 52 (PTHR13720:SF14)	microtubule or microtubule-binding cytoskeletal protein(PC00157)
DANRE|ZFIN=ZDB-GENE-050522-322|UniProtKB=F1QHZ6	ZDB-GENE-050522-322	Dynein axonemal intermediate chain 4;dnai4;PTN000277939;orthologs	DYNEIN AXONEMAL INTERMEDIATE CHAIN 4 (PTHR12442:SF12)	microtubule or microtubule-binding cytoskeletal protein(PC00157)
DANRE|ZFIN=ZDB-GENE-050706-71|UniProtKB=A0A2R8Q696	ZDB-GENE-050706-71	EMAP-like 2;eml2;PTN000347202;orthologs	ECHINODERM MICROTUBULE-ASSOCIATED PROTEIN-LIKE 2 (PTHR13720:SF50)	microtubule or microtubule-binding cytoskeletal protein(PC00157)
DANRE|ZFIN=ZDB-GENE-050809-44|UniProtKB=F1Q506	ZDB-GENE-050809-44	Sorting nexin-10A;snx10a;PTN000831019;orthologs	SORTING NEXIN-10 (PTHR46209:SF2)
DANRE|ZFIN=ZDB-GENE-060503-471|UniProtKB=F1QES5	ZDB-GENE-060503-471	Junctional cadherin complex regulator;jhy;PTN001027708;orthologs	JHY PROTEIN HOMOLOG (PTHR14726:SF1)
DANRE|ZFIN=ZDB-GENE-060526-350|UniProtKB=A0A0R4IGG0	ZDB-GENE-060526-350	Kinesin-like protein;si:dkey-96l17.6;PTN002516256;orthologs	KINESIN-LIKE PROTEIN (PTHR24115:SF162)	microtubule binding motor protein(PC00156)
DANRE|ZFIN=ZDB-GENE-061013-787|UniProtKB=A0A2R8RI11	ZDB-GENE-061013-787	Coiled-coil domain containing 151;odad3;PTN000495692;orthologs	OUTER DYNEIN ARM-DOCKING COMPLEX SUBUNIT 3 (PTHR46518:SF1)
DANRE|ZFIN=ZDB-GENE-061027-130|UniProtKB=E7FFQ3	ZDB-GENE-061027-130	Kinesin-like protein;kif6;PTN001189700;orthologs	KINESIN-LIKE PROTEIN KIF6 (PTHR24115:SF194)	microtubule binding motor protein(PC00156)
DANRE|ZFIN=ZDB-GENE-061027-337|UniProtKB=F1QK17	ZDB-GENE-061027-337	Sperm autoantigenic protein 17;spa17;PTN000471975;orthologs	SPERM SURFACE PROTEIN SP17 (PTHR10699:SF16)
DANRE|ZFIN=ZDB-GENE-061207-4|UniProtKB=F1QJB0	ZDB-GENE-061207-4	Si:ch211-13f8.1;si:ch211-13f8.1;PTN001048425;orthologs	SI:CH211-13F8.1 (PTHR14102:SF15)	tight junction(PC00214)
DANRE|ZFIN=ZDB-GENE-061215-15|UniProtKB=A2BIN6	ZDB-GENE-061215-15	Zgc:158640;zgc:158640;PTN002141763;orthologs	INTRAFLAGELLAR TRANSPORT PROTEIN 25 HOMOLOG (PTHR33906:SF1)
DANRE|ZFIN=ZDB-GENE-070112-632|UniProtKB=A1L1R5	ZDB-GENE-070112-632	Protein tyrosine phosphatase domain-containing protein 1;ptpdc1;PTN000597091;orthologs	PROTEIN TYROSINE PHOSPHATASE DOMAIN-CONTAINING 1B-RELATED (PTHR23339:SF113)	protein phosphatase(PC00195)
DANRE|ZFIN=ZDB-GENE-070127-4|UniProtKB=Q0H0R9	ZDB-GENE-070127-4	Leukocyte cell-derived chemotaxin 2;lect2.1;PTN000140556;orthologs	LEUKOCYTE CELL-DERIVED CHEMOTAXIN 2-RELATED (PTHR11329:SF2)	chemokine(PC00074)
DANRE|Ensembl=ENSDARG00000041735|UniProtKB=F1Q930	ZDB-GENE-070402-3	Transmembrane protein 237A;tmem237a;PTN002002315;orthologs	TRANSMEMBRANE PROTEIN 237 (PTHR28388:SF1)
DANRE|ZFIN=ZDB-GENE-070705-215|UniProtKB=A0A2R8Q7H2	ZDB-GENE-070705-215	Par-6 family cell polarity regulator alpha;pard6a;PTN001019972;orthologs	PARTITIONING DEFECTIVE 6 HOMOLOG ALPHA (PTHR14102:SF9)	tight junction(PC00214)
DANRE|ZFIN=ZDB-GENE-080107-1|UniProtKB=A8CVX7	ZDB-GENE-080107-1	Tubulin polyglutamylase ttll6;ttll6;PTN000956223;orthologs	TUBULIN POLYGLUTAMYLASE TTLL6 (PTHR12241:SF161)	microtubule or microtubule-binding cytoskeletal protein(PC00157)
DANRE|ZFIN=ZDB-GENE-080130-2|UniProtKB=E7F7G5	ZDB-GENE-080130-2	Tektin;tekt3;PTN001072110;orthologs	TEKTIN (PTHR19960:SF11)	non-motor microtubule binding protein(PC00166)
DANRE|ZFIN=ZDB-GENE-080204-2|UniProtKB=A0A0R4IFH3	ZDB-GENE-080204-2	Organic solute carrier partner 1a;oscp1a;PTN001086812;orthologs	PROTEIN OSCP1 (PTHR21439:SF0)
DANRE|ZFIN=ZDB-GENE-080815-3|UniProtKB=F1QEM0	ZDB-GENE-080815-3	Cilia- and flagella-associated protein 43 (Fragment);cfap43;PTN001028714;orthologs	CILIA- AND FLAGELLA-ASSOCIATED PROTEIN 43 (PTHR14885:SF1)
DANRE|ZFIN=ZDB-GENE-081015-2|UniProtKB=F1QM29	ZDB-GENE-081015-2	Retinitis pigmentosa GTPase regulator b;rpgrb;PTN001110867;orthologs	RETINITIS PIGMENTOSA GTPASE REGULATOR A-RELATED (PTHR22870:SF440)	guanyl-nucleotide exchange factor(PC00113)
DANRE|ZFIN=ZDB-GENE-090311-9|UniProtKB=E9QBH9	ZDB-GENE-090311-9	Dynein, axonemal, heavy chain 12;dnah12;PTN000839974;orthologs	DYNEIN AXONEMAL HEAVY CHAIN 12 (PTHR10676:SF255)	microtubule binding motor protein(PC00156)
DANRE|ZFIN=ZDB-GENE-090312-134|UniProtKB=E9QC56	ZDB-GENE-090312-134	Si:dkey-26i13.8;si:dkey-26i13.8;PTN001190093;orthologs	KINESIN-LIKE PROTEIN (PTHR24115:SF549)	microtubule binding motor protein(PC00156)
DANRE|ZFIN=ZDB-GENE-090313-354|UniProtKB=A0A0R4IFC6	ZDB-GENE-090313-354	Si:dkey-92j12.5;si:dkey-92j12.5;PTN002500766;orthologs	MULTIPLE PDZ DOMAIN PROTEIN (PTHR19964:SF10)	scaffold/adaptor protein(PC00226)
DANRE|ZFIN=ZDB-GENE-090417-1|UniProtKB=Q6IQF6	ZDB-GENE-090417-1	Chemokine (C-C motif) receptor 6a;cep43;PTN002693097;orthologs	CENTROSOMAL PROTEIN 43 (PTHR15431:SF9)
DANRE|ZFIN=ZDB-GENE-091112-7|UniProtKB=A0A2R8QK00	ZDB-GENE-091112-7	Dynein axonemal heavy chain 3;dnah3;;orthologs
DANRE|ZFIN=ZDB-GENE-091204-394|UniProtKB=E9QHV7	ZDB-GENE-091204-394	RPGR-interacting protein 1;rpgrip1;PTN001023013;orthologs	RPGR-INTERACTING PROTEIN 1-RELATED (PTHR14240:SF1)	scaffold/adaptor protein(PC00226)
DANRE|ZFIN=ZDB-GENE-091204-67|UniProtKB=E7F542	ZDB-GENE-091204-67	Rp1-like 1b;rp1l1b;PTN001493311;orthologs	RP1-LIKE 1B (PTHR23005:SF6)
DANRE|ZFIN=ZDB-GENE-100701-2|UniProtKB=E7FGH9	ZDB-GENE-100701-2	Coiled-coil domain-containing 88Aa;ccdc88aa;PTN001055576;orthologs	GIRDIN (PTHR18947:SF30)	membrane traffic protein(PC00150)
DANRE|Ensembl=ENSDARG00000089742|UniProtKB=E7F9W4	ZDB-GENE-110310-1	FAM161 centrosomal protein A;fam161a;PTN001088579;orthologs	PROTEIN FAM161A (PTHR21501:SF3)
DANRE|ZFIN=ZDB-GENE-110411-177|UniProtKB=E7F170	ZDB-GENE-110411-177	Dynein, axonemal, heavy chain 5;dnah5;PTN000840544;orthologs	DYNEIN AXONEMAL HEAVY CHAIN 5 (PTHR10676:SF344)	microtubule binding motor protein(PC00156)
DANRE|ZFIN=ZDB-GENE-110603-1|UniProtKB=P0CK98	ZDB-GENE-110603-1	Coiled-coil domain-containing protein 39;ccdc39;PTN001825846;orthologs	COILED-COIL DOMAIN-CONTAINING PROTEIN 39 (PTHR18962:SF0)
DANRE|ZFIN=ZDB-GENE-120214-26|UniProtKB=E7F244	ZDB-GENE-120214-26	Tubulin alpha chain;si:ch211-114n24.6;PTN000173291;orthologs	TUBULIN ALPHA CHAIN (PTHR11588:SF75)	tubulin(PC00228)
DANRE|ZFIN=ZDB-GENE-120411-6|UniProtKB=E7FDU7	ZDB-GENE-120411-6	Transmembrane channel-like protein;tmc5;PTN000591994;orthologs	TRANSMEMBRANE CHANNEL-LIKE PROTEIN 5 (PTHR23302:SF5)	ion channel(PC00133)
DANRE|ZFIN=ZDB-GENE-120711-1|UniProtKB=E7F630	ZDB-GENE-120711-1	Rp1-like 1a;rp1l1a;PTN001124082;orthologs	RETINITIS PIGMENTOSA 1-LIKE 1 PROTEIN (PTHR23005:SF3)
DANRE|ZFIN=ZDB-GENE-130530-1027|UniProtKB=X1WEK9	ZDB-GENE-130530-1027	Kinesin family member 28 (Fragment);kif28;;orthologs
DANRE|Ensembl=ENSDARG00000087352|UniProtKB=A0A1D5NT12	ZDB-GENE-130530-910	Dynein, axonemal, heavy chain 2;dnah2;PTN000840377;orthologs	DYNEIN AXONEMAL HEAVY CHAIN 2 (PTHR10676:SF183)	microtubule binding motor protein(PC00156)
DANRE|Ensembl=ENSDARG00000074508|UniProtKB=E7FGK6	ZDB-GENE-141215-28	Si:dkey-28e7.3;hap1;PTN001039695;orthologs	HUNTINGTIN-ASSOCIATED PROTEIN 1 (PTHR15751:SF14)	membrane traffic protein(PC00150)
DANRE|ZFIN=ZDB-GENE-141222-88|UniProtKB=A0A0R4IGZ6	ZDB-GENE-141222-88	Si:dkey-23f9.4;si:dkey-23f9.4;PTN002531596;orthologs	HYDROLETHALUS SYNDROME PROTEIN 1 (PTHR34174:SF1)
DANRE|Ensembl=ENSDARG00000031693|UniProtKB=F1QYE9	ZDB-GENE-160728-129	Kinesin-like protein;kif9;PTN000650325;orthologs	KINESIN-LIKE PROTEIN KIF9 (PTHR24115:SF191)	microtubule binding motor protein(PC00156)
